# Supplementary material for: Actinospongicola halichondriae gen. nov. sp. nov., the first sponge-derived cultivated representative of a new genus within the class Acidimicrobiia
Source: Research Square preprint supplement (doi:10.21203/rs.3.rs-5934688/v1), 2025-03-12
Supplement: Supplementary file 1 [file 0eea08c359949e98869c2a05.docx]

**Table 2** Differential characteristics of strain Hal370T and phylogenetically related type strains derived from the comparative genome analysis

| **Cluster** | **Description** | **1** | **2** | **3** | **4** | **5** | **6** | **7** |
| --- | --- | --- | --- | --- | --- | --- | --- | --- |
| K03119 | *tauD*; taurine dioxygenase [EC:1.14.11.17] | + | - | + | + | + | + | - |
| K03791 | Putative chitinase | + | - | - | - | - | + | - |
| K01428 | *ureC*; urease subunit alpha [EC:3.5.1.5] | + | - | - | + | - | - | - |
| K01429 | *ureB*; urease subunit beta [EC:3.5.1.5] | + | - | - | + | - | - | - |
| K01430 | *ureA*;urease subunit gamma [EC:3.5.1.5] | + | - | - | + | - | - | - |
| K00836 | *ectB*, *dat*; diaminobutyrate-2-oxoglutarate transaminase [EC:2.6.1.76] | + | + | - | - | + | + | - |
| K06720 | *ectC*; L-ectoine synthase [EC:4.2.1.108] | + | + | - | - | + | + | - |
| K07746 | parD1_3_4; antitoxin ParD1/3/4 | + | - | - | + | - | + | - |
| K19092 | parE1_3_4; antitoxin ParE1/3/4 | + | - | - | - | - | + | - |
| K07116 | *pvdQ*, *quiP*; acyl-homoserine-lactone acylase [EC:3.5.1.97] | + | - | + | - | - | - | + |
| K13075 | *ahlD*, *aiiA*, *attM*, *blcC*;N-acyl homoserine lactone hydrolase [EC:3.1.1.81] | + | - | - | + | - | - | - |
| K07657 | *phoB*; two-component system, OmpR family, phosphate regulon response regulator PhoB | + | - | - | - | - | - | - |
| KO6193 | *phnA*; protein PhnA | + | - | - | - | - | - | - |
| K02041 | *phnC*; phosphonate transport system ATP-binding protein [EC:7.3.2.2] | + | - | - | - | - | - | - |
| K02042 | *phnE*; phosphonate transport system permease protein | + | - | - | - | - | - | - |
| K02044 | *phnD*; phosphonate transport system substrate-binding protein | + | - | - | - | - | - | - |
| K10005 | *gluB*; glutamate transport system substrate-binding protein | + | - | - | - | - | - | - |
| K10006 | *gluC*; glutamate transport system permease protein | + | - | - | - | - | - | - |
| K10007 | *gluD*; glutamate transport system permease protein | + | - | - | - | - | - | - |
| K00064 | D-threo-aldose 1-dehydrogenase [EC:1.1.1.122] | + | - | - | - | - | - | - |
| K18334 | *fucD*; L-fuconate dehydratase [EC:4.2.1.68] | + | - | - | - | - | - | - |
| K07046 | L-fucono-1,5-lactonase [EC:3.1.1.120] | + | - | - | - | - | - | - |
| K13274 | *wprA*; cell wall-associated protease [EC:3.4.21.-] | + | - | - | - | - | - | - |
| K13277 | *epr*; minor extracellular protease Epr [EC:3.4.21.-] | + | - | - | - | - | - | - |

Strains: 1, Hal317T (CP107030, this study); 2, *Actinomarinicola tropica* SCSIO 58843T (GCA_009650215.1); 3, *Aquihabitans daechungensis* CH22-21T (CP172265, this study); 4, *Dermatobacter hominis* Kera-3T (GCA_020715685.1); 5, *Iamia majanohamensis* F12T (GCA_028532485.1); 6, *Rhabdothermincola salaria* EGI L10124T (GCA_021246445.1); 7, *Rhabdothermincola sediminis* SYSU G02662T (GCA_014805525.1); +, present; -, absent
