# Supplementary material for: Actinospongicola halichondriae gen. nov. sp. nov., the first sponge-derived cultivated representative of a new genus within the class Acidimicrobiia
Source: Research Square preprint supplement (doi:10.21203/rs.3.rs-5934688/v1), 2025-03-12
Supplement: Supplementary file 2 [file 222d241883095bdb3ab328f2.docx]

**Supplement**

***Actinospongicola halichondriae* gen. nov. sp. nov., the first sponge-derived cultivated representative of a new genus within the class *Acidimicrobiia***

Jing Huang, Jutta Wiese, Leon X. Steiner, Tanja Rahn, Erik Borchert, Ute Hentschel

**Figure S1** Polar lipids profile of strain Hal317T


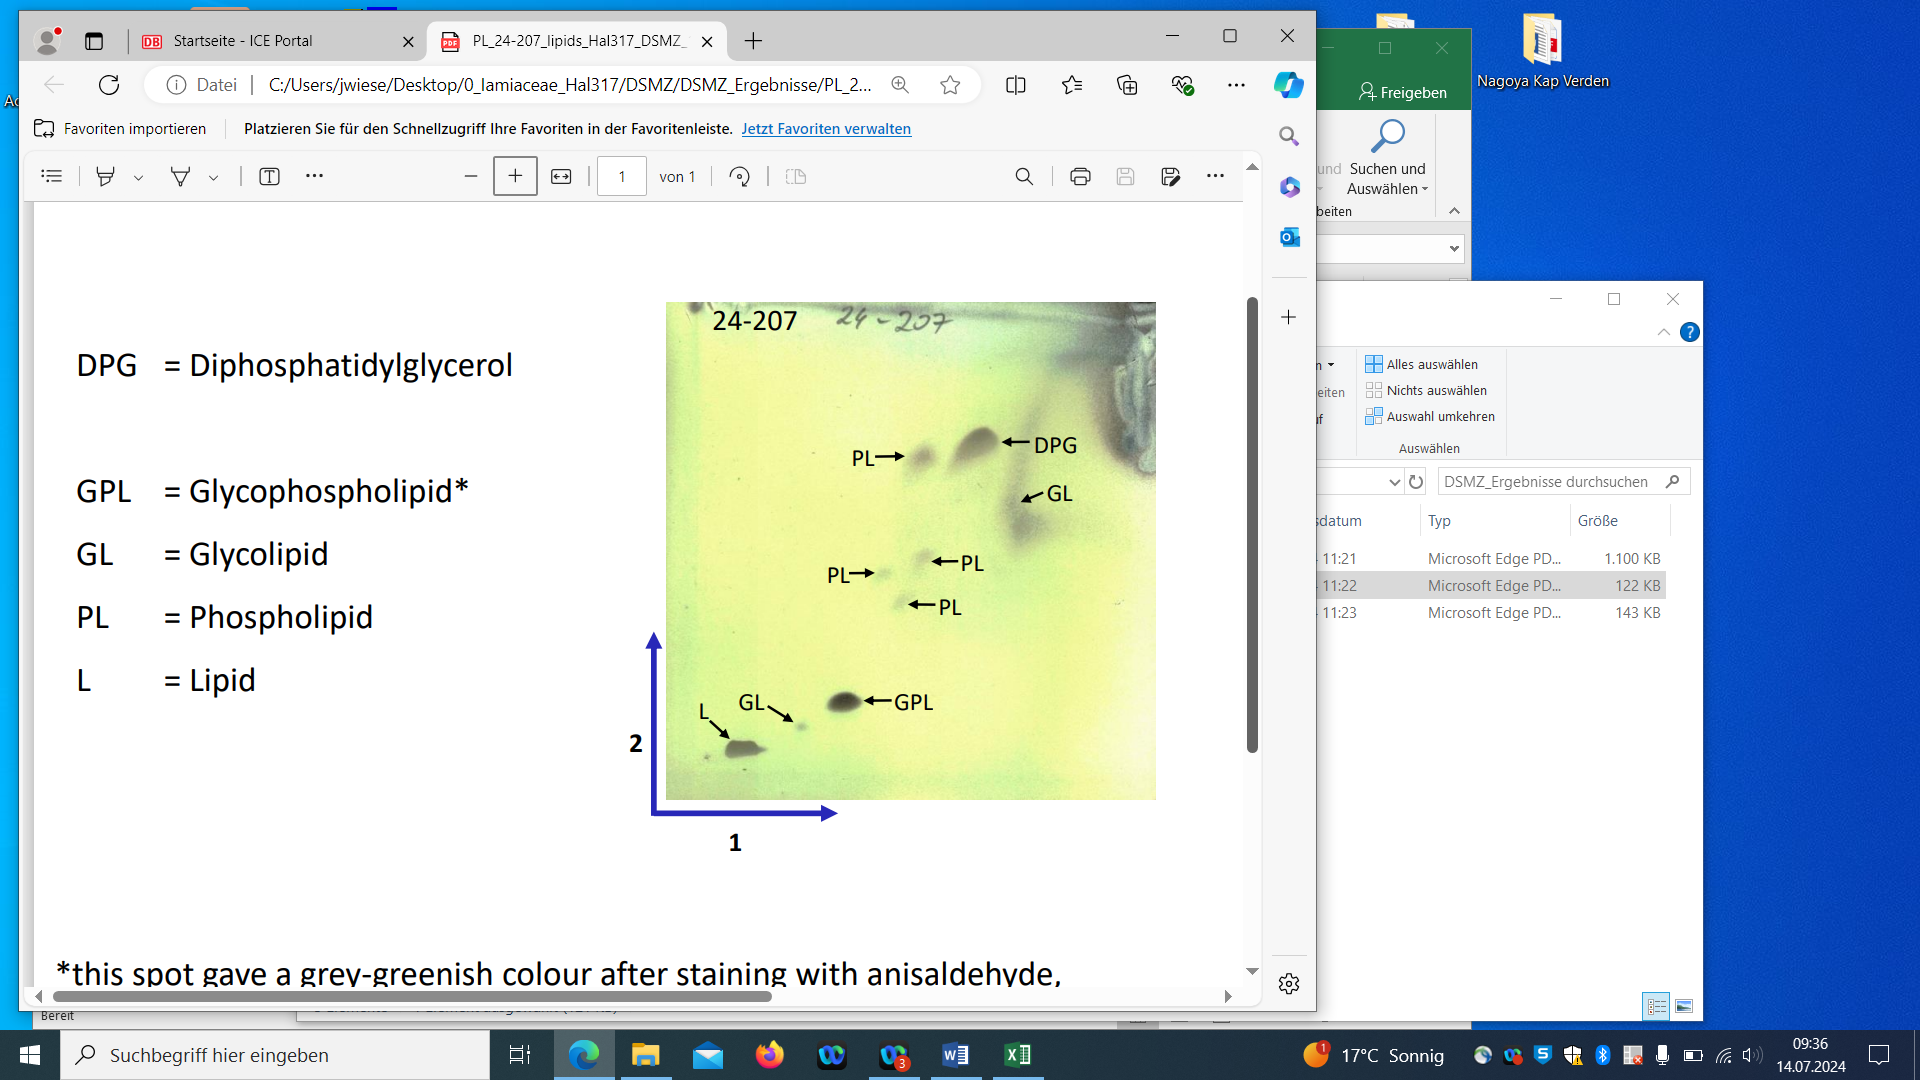


Legend: DPG, diphosphatidylglycerol; GL, glycolipid; GPL, glycophosholipid; L, lipid; PL, phospholipid
