# Supplementary material for: Actinospongicola halichondriae gen. nov. sp. nov., the first sponge-derived cultivated representative of a new genus within the class Acidimicrobiia
Source: Research Square preprint supplement (doi:10.21203/rs.3.rs-5934688/v1), 2025-03-12
Supplement: Supplementary file 3 [file 2d6f903b1fa056c38605f6aa.docx]

| Genome feature | 1 | 2 | 3 | 4 | 5 | 6 | 7 |
| --- | --- | --- | --- | --- | --- | --- | --- |
| Size (Mb) | 4.08 | 3.72 | 4.16 | 4.66 | 4.58 | 3.91 | 3.29 |
| Number of contigs (>1000 bp) | 1 | 1 | 1 | 1 | 1 | 7 | 49 |
| N50 (bp) | 4,081,508 | 3,715,454 | 4,162,068 | 4,661,060 | 4,576,919 | 2,005,197 | 175,816 |
| G+C content (%) | 69 | 73 | 71 | 73 | 75 | 72 | 71 |
| Completeness (%) | 97.56 | 98.84 | 91.24 | 95.78 | 99.44 | 97.83 | 100.00 |
| Contamination (%) | 1.15 | 1.29 | 1.57 | 0.13 | 0.67 | 0.25 | 0.42 |
| Coding sequences | 3986 | 3658 | 4087 | 4288 | 4304 | 3579 | 3199 |
| Coding density | 0.938 | 0.933 | 0.897 | 0.918 | 0.912 | 0.911 | 0.924 |
| Pseudogenes | 1 | 0 | 31 | 0 | 1 | 0 | 0 |
| tRNA | 48 | 49 | 47 | 46 | 51 | 47 | 47 |
| rRNA | 3 | 3 | 3 | 3 | 3 | 3 | 3 |

**Table 1** Comparison of the general genomic features of strain Hal317T and the other type strains of the family *Iamiaceae*

Strains: 1, Hal317T (CP107030, this study); 2, *Actinomarinicola tropica* SCSIO 58843T (GCA_009650215.1); 3, *Aquihabitans daechungensis* CH22-21T (CP172265, this study); 4, *Dermatobacter hominis* Kera-3T (GCA_020715685.1); 5, *Iamia majanohamensis* F12T (GCA_028532485.1); 6, *Rhabdothermincola salaria* EGI L10124T (GCA_021246445.1); 7, *Rhabdothermincola sediminis* SYSU G02662T (GCA_014805525.1).
