# Supplementary material for: Actinospongicola halichondriae gen. nov. sp. nov., the first sponge-derived cultivated representative of a new genus within the class Acidimicrobiia
Source: Research Square preprint supplement (doi:10.21203/rs.3.rs-5934688/v1), 2025-03-12
Supplement: Supplementary file 4 [file a2d19a0f3b887dd5a88b4528.xlsx]

## Sheet: Table S1
Supplement
Actinospongicola halichondriae gen. nov. sp. nov., the first sponge-derived cultivated representative of a new genus within the class Acidimicrobiia
Jing Huang, Jutta Wiese, Leon X. Steiner, Tanja Rahn, Erik Borchert, Ute Hentschel
Table S1 Genome-wide annotation of strain Hal317T and type strains of the family Iamiaceae using eggNOG -mapper
KO_id	Description	Hal317T (CP107030, this study)	Iamia majanohamensis F12T (GCA_028532485.1)	Aquihabitans daechungensis CH22-21T (CP172265, this study)	Rhabdothermincola sediminis SYSU G02662T (GCA_014805525.1)	Actinomarinicola tropica SCSIO 58843T (GCA_009650215.1)	Dermatobacter hominis Kera-3T (GCA_020715685.1)	Rhabdothermincola salaria EGI L10124T (GCA_021246445.1)
K00001	E1.1.1.1, adh; alcohol dehydrogenase [EC:1.1.1.1]	3	2	1	0	3	2	2
K00003	hom; homoserine dehydrogenase [EC:1.1.1.3]	1	1	1	1	1	1	1
K00004	BDH, butB; (R,R)-butanediol dehydrogenase / meso-butanediol dehydrogenase / diacetyl reductase [EC:1.1.1.4 1.1.1.- 1.1.1.303]	0	0	1	1	0	0	0
K00008	SORD, gutB; L-iditol 2-dehydrogenase [EC:1.1.1.14]	0	0	0	0	0	1	1
K00010	iolG; myo-inositol 2-dehydrogenase / D-chiro-inositol 1-dehydrogenase [EC:1.1.1.18 1.1.1.369]	0	1	0	0	0	0	0
K00012	UGDH, ugd; UDPglucose 6-dehydrogenase [EC:1.1.1.22]	1	1	1	1	1	1	1
K00013	hisD; histidinol dehydrogenase [EC:1.1.1.23]	1	1	1	1	1	1	1
K00014	aroE; shikimate dehydrogenase [EC:1.1.1.25]	1	1	1	1	1	1	1
K00015	gyaR, GOR1; glyoxylate reductase [EC:1.1.1.26]	0	1	0	1	0	0	1
K00020	HIBADH, mmsB; 3-hydroxyisobutyrate dehydrogenase [EC:1.1.1.31]	1	1	1	0	0	1	1
K00024	mdh; malate dehydrogenase [EC:1.1.1.37]	1	2	1	1	1	1	1
K00027	ME2, sfcA, maeA; malate dehydrogenase (oxaloacetate-decarboxylating) [EC:1.1.1.38]	1	2	1	1	1	1	1
K00031	IDH1, IDH2, icd; isocitrate dehydrogenase [EC:1.1.1.42]	0	1	1	1	1	1	1
K00033	PGD, gnd, gntZ; 6-phosphogluconate dehydrogenase [EC:1.1.1.44 1.1.1.343]	1	1	1	1	1	1	1
K00034	gdh; glucose 1-dehydrogenase [EC:1.1.1.47]	0	1	0	0	0	0	0
K00036	G6PD, zwf; glucose-6-phosphate 1-dehydrogenase [EC:1.1.1.49 1.1.1.363]	1	1	1	1	1	1	2
K00038	E1.1.1.53; 3alpha(or 20beta)-hydroxysteroid dehydrogenase [EC:1.1.1.53]	0	2	0	1	1	1	4
K00046	idnO; gluconate 5-dehydrogenase [EC:1.1.1.69]	2	2	2	2	3	1	2
K00052	leuB, IMDH; 3-isopropylmalate dehydrogenase [EC:1.1.1.85]	1	1	1	1	1	1	1
K00053	ilvC; ketol-acid reductoisomerase [EC:1.1.1.86]	1	1	2	2	1	1	1
K00055	E1.1.1.90; aryl-alcohol dehydrogenase [EC:1.1.1.90]	0	1	1	1	0	0	0
K00057	gpsA; glycerol-3-phosphate dehydrogenase (NAD(P)+) [EC:1.1.1.94]	1	0	1	1	1	1	1
K00058	serA, PHGDH; D-3-phosphoglycerate dehydrogenase / 2-oxoglutarate reductase [EC:1.1.1.95 1.1.1.399]	2	1	1	2	1	2	1
K00059	fabG, OAR1; 3-oxoacyl-[acyl-carrier protein] reductase [EC:1.1.1.100]	4	5	5	7	3	11	17
K00064	E1.1.1.122; D-threo-aldose 1-dehydrogenase [EC:1.1.1.122]	1	0	0	0	0	0	0
K00067	rfbD, rmlD; dTDP-4-dehydrorhamnose reductase [EC:1.1.1.133]	2	2	1	2	3	3	2
K00068	srlD; sorbitol-6-phosphate 2-dehydrogenase [EC:1.1.1.140]	0	1	0	0	0	0	0
K00074	paaH, hbd, fadB, mmgB; 3-hydroxybutyryl-CoA dehydrogenase [EC:1.1.1.157]	1	1	1	1	1	1	1
K00075	murB; UDP-N-acetylmuramate dehydrogenase [EC:1.3.1.98]	1	1	2	1	1	1	1
K00076	hdhA; 7-alpha-hydroxysteroid dehydrogenase [EC:1.1.1.159]	1	0	1	1	0	1	1
K00077	panE, apbA; 2-dehydropantoate 2-reductase [EC:1.1.1.169]	2	1	0	1	1	2	0
K00082	ribD2; 5-amino-6-(5-phosphoribosylamino)uracil reductase [EC:1.1.1.193]	1	1	2	0	1	1	1
K00087	ygeS, xdhA; xanthine dehydrogenase molybdenum-binding subunit [EC:1.17.1.4]	1	1	1	1	1	0	1
K00088	IMPDH, guaB; IMP dehydrogenase [EC:1.1.1.205]	2	2	3	1	2	2	1
K00099	dxr; 1-deoxy-D-xylulose-5-phosphate reductoisomerase [EC:1.1.1.267]	1	1	1	1	1	1	1
K00101	lldD; L-lactate dehydrogenase (cytochrome) [EC:1.1.2.3]	1	1	0	0	1	1	1
K00102	LDHD, dld; D-lactate dehydrogenase (cytochrome) [EC:1.1.2.4]	1	0	0	1	1	0	0
K00103	GULO; L-gulonolactone oxidase [EC:1.1.3.8]	0	0	0	1	0	1	0
K00104	glcD; glycolate oxidase [EC:1.1.3.15]	0	1	1	1	1	1	1
K00108	betA, CHDH; choline dehydrogenase [EC:1.1.99.1]	0	2	0	0	0	0	0
K00111	glpA, glpD; glycerol-3-phosphate dehydrogenase [EC:1.1.5.3]	2	1	1	1	1	2	3
K00121	frmA, ADH5, adhC; S-(hydroxymethyl)glutathione dehydrogenase / alcohol dehydrogenase [EC:1.1.1.284 1.1.1.1]	3	2	3	2	0	4	3
K00122	FDH; formate dehydrogenase [EC:1.17.1.9]	0	0	0	0	0	1	0
K00123	fdoG, fdhF, fdwA; formate dehydrogenase major subunit [EC:1.17.1.9]	0	1	1	0	0	0	0
K00127	fdoI, fdsG; formate dehydrogenase subunit gamma	1	0	0	0	0	0	0
K00128	ALDH; aldehyde dehydrogenase (NAD+) [EC:1.2.1.3]	4	5	6	4	4	5	1
K00130	betB, gbsA; betaine-aldehyde dehydrogenase [EC:1.2.1.8]	1	1	2	1	0	1	0
K00133	asd; aspartate-semialdehyde dehydrogenase [EC:1.2.1.11]	1	1	1	1	1	1	1
K00134	GAPDH, gapA; glyceraldehyde 3-phosphate dehydrogenase [EC:1.2.1.12]	1	1	1	1	4	1	1
K00135	gabD; succinate-semialdehyde dehydrogenase / glutarate-semialdehyde dehydrogenase [EC:1.2.1.16 1.2.1.79 1.2.1.20]	3	1	1	1	0	1	1
K00137	prr; aminobutyraldehyde dehydrogenase [EC:1.2.1.19]	1	0	1	0	0	1	0
K00140	mmsA, iolA, ALDH6A1; malonate-semialdehyde dehydrogenase (acetylating) / methylmalonate-semialdehyde dehydrogenase [EC:1.2.1.18 1.2.1.27]	1	0	1	0	0	1	0
K00145	argC; N-acetyl-gamma-glutamyl-phosphate reductase [EC:1.2.1.38]	1	1	1	1	1	1	1
K00147	proA; glutamate-5-semialdehyde dehydrogenase [EC:1.2.1.41]	1	1	1	1	1	1	1
K00153	E1.1.1.306; S-(hydroxymethyl)mycothiol dehydrogenase [EC:1.1.1.306]	1	1	1	0	0	1	1
K00156	poxB; pyruvate dehydrogenase (quinone) [EC:1.2.5.1]	1	1	0	0	0	0	0
K00161	PDHA, pdhA; pyruvate dehydrogenase E1 component alpha subunit [EC:1.2.4.1]	0	0	0	0	1	0	0
K00162	PDHB, pdhB; pyruvate dehydrogenase E1 component beta subunit [EC:1.2.4.1]	0	0	0	0	1	0	0
K00163	aceE; pyruvate dehydrogenase E1 component [EC:1.2.4.1]	1	1	1	1	1	1	1
K00164	OGDH, sucA; 2-oxoglutarate dehydrogenase E1 component [EC:1.2.4.2]	1	1	1	1	1	1	1
K00174	korA, oorA, oforA; 2-oxoglutarate/2-oxoacid ferredoxin oxidoreductase subunit alpha [EC:1.2.7.3 1.2.7.11]	1	1	1	1	1	1	1
K00175	korB, oorB, oforB; 2-oxoglutarate/2-oxoacid ferredoxin oxidoreductase subunit beta [EC:1.2.7.3 1.2.7.11]	1	1	0	1	1	1	1
K00184	dmsB; dimethyl sulfoxide reductase iron-sulfur subunit	0	0	0	1	0	0	0
K00185	dmsC; dimethyl sulfoxide reductase membrane subunit	0	0	0	1	0	0	0
K00208	fabI; enoyl-[acyl-carrier protein] reductase I [EC:1.3.1.9 1.3.1.10]	1	1	2	1	1	1	1
K00210	#N/A	1	1	1	1	1	1	1
K00215	dapB; 4-hydroxy-tetrahydrodipicolinate reductase [EC:1.17.1.8]	1	1	1	1	1	2	1
K00216	entA; 2,3-dihydro-2,3-dihydroxybenzoate dehydrogenase [EC:1.3.1.28]	0	0	0	0	0	0	1
K00218	por; protochlorophyllide reductase [EC:1.3.1.33]	0	1	0	0	0	0	0
K00219	fadH; 2,4-dienoyl-CoA reductase (NADPH2) [EC:1.3.1.34]	0	1	1	1	1	2	3
K00226	pyrD; dihydroorotate dehydrogenase (fumarate) [EC:1.3.98.1]	0	0	0	1	1	0	1
K00230	hemG; menaquinone-dependent protoporphyrinogen oxidase [EC:1.3.5.3]	0	0	1	0	0	0	0
K00231	PPOX, hemY; protoporphyrinogen/coproporphyrinogen III oxidase [EC:1.3.3.4 1.3.3.15]	1	1	1	1	1	1	1
K00239	sdhA, frdA; succinate dehydrogenase / fumarate reductase, flavoprotein subunit [EC:1.3.5.1 1.3.5.4]	1	1	1	1	1	1	1
K00240	sdhB, frdB; succinate dehydrogenase / fumarate reductase, iron-sulfur subunit [EC:1.3.5.1 1.3.5.4]	1	1	0	1	1	1	1
K00241	sdhC, frdC; succinate dehydrogenase / fumarate reductase, cytochrome b subunit	1	1	1	1	1	1	1
K00248	ACADS, bcd; butyryl-CoA dehydrogenase [EC:1.3.8.1]	1	2	2	2	2	2	2
K00249	ACADM, acd; acyl-CoA dehydrogenase [EC:1.3.8.7]	9	12	8	9	7	7	6
K00257	mbtN, fadE14; acyl-ACP dehydrogenase [EC:1.3.99.-]	1	1	1	1	1	1	0
K00259	ald; alanine dehydrogenase [EC:1.4.1.1]	2	0	1	1	1	1	1
K00261	GLUD1_2, gdhA; glutamate dehydrogenase (NAD(P)+) [EC:1.4.1.3]	3	1	0	0	0	0	0
K00262	E1.4.1.4, gdhA; glutamate dehydrogenase (NADP+) [EC:1.4.1.4]	1	0	1	0	1	1	1
K00263	E1.4.1.9; leucine dehydrogenase [EC:1.4.1.9]	1	0	0	0	1	0	0
K00265	gltB; glutamate synthase (NADPH) large chain [EC:1.4.1.13]	1	1	1	2	1	1	1
K00266	gltD; glutamate synthase (NADPH) small chain [EC:1.4.1.13]	1	1	1	1	0	1	1
K00271	vdh; valine dehydrogenase (NAD+) [EC:1.4.1.23]	0	1	0	0	0	0	0
K00274	MAO, aofH; monoamine oxidase [EC:1.4.3.4]	0	1	2	1	0	1	1
K00275	pdxH, PNPO; pyridoxamine 5'-phosphate oxidase [EC:1.4.3.5]	1	1	2	0	1	1	1
K00276	AOC3, AOC2, tynA; primary-amine oxidase [EC:1.4.3.21]	0	0	0	1	0	1	0
K00278	nadB; L-aspartate oxidase [EC:1.4.3.16]	1	1	2	1	1	1	1
K00281	GLDC, gcvP; glycine dehydrogenase [EC:1.4.4.2]	1	1	2	1	1	1	1
K00284	GLU, gltS; glutamate synthase (ferredoxin) [EC:1.4.7.1]	0	0	0	1	1	0	2
K00286	proC; pyrroline-5-carboxylate reductase [EC:1.5.1.2]	1	1	1	1	1	1	1
K00287	DHFR, folA; dihydrofolate reductase [EC:1.5.1.3]	0	1	0	0	0	0	0
K00290	LYS1; saccharopine dehydrogenase (NAD+, L-lysine forming) [EC:1.5.1.7]	0	0	1	0	0	1	0
K00297	metF, MTHFR; methylenetetrahydrofolate reductase (NADPH) [EC:1.5.1.20]	1	1	1	1	1	1	1
K00299	ssuE; FMN reductase [EC:1.5.1.38]	0	0	0	0	0	1	0
K00301	E1.5.3.1; sarcosine oxidase [EC:1.5.3.1]	0	0	0	0	0	1	0
K00313	fixC; electron transfer flavoprotein-quinone oxidoreductase [EC:1.5.5.-]	0	0	0	0	0	1	1
K00317	dmd-tmd; dimethylamine/trimethylamine dehydrogenase [EC:1.5.8.1 1.5.8.2]	0	0	0	0	0	0	1
K00320	mer; 5,10-methylenetetrahydromethanopterin reductase [EC:1.5.98.2]	0	1	0	0	0	0	0
K00329	#N/A	0	0	0	1	0	0	0
K00330	nuoA; NADH-quinone oxidoreductase subunit A [EC:7.1.1.2]	2	2	1	2	4	2	2
K00331	nuoB; NADH-quinone oxidoreductase subunit B [EC:7.1.1.2]	2	2	2	2	2	2	2
K00332	nuoC; NADH-quinone oxidoreductase subunit C [EC:7.1.1.2]	2	2	2	2	2	2	2
K00333	nuoD; NADH-quinone oxidoreductase subunit D [EC:7.1.1.2]	2	2	2	2	2	2	2
K00334	nuoE; NADH-quinone oxidoreductase subunit E [EC:7.1.1.2]	1	1	2	1	1	1	1
K00335	nuoF; NADH-quinone oxidoreductase subunit F [EC:7.1.1.2]	1	1	1	1	1	1	1
K00336	nuoG; NADH-quinone oxidoreductase subunit G [EC:7.1.1.2]	1	1	1	1	1	1	1
K00337	nuoH; NADH-quinone oxidoreductase subunit H [EC:7.1.1.2]	2	3	2	2	3	2	2
K00338	nuoI; NADH-quinone oxidoreductase subunit I [EC:7.1.1.2]	2	2	2	2	2	2	2
K00339	nuoJ; NADH-quinone oxidoreductase subunit J [EC:7.1.1.2]	2	2	2	2	2	2	2
K00340	nuoK; NADH-quinone oxidoreductase subunit K [EC:7.1.1.2]	2	2	2	2	2	2	2
K00341	nuoL; NADH-quinone oxidoreductase subunit L [EC:7.1.1.2]	3	2	2	2	2	3	3
K00342	nuoM; NADH-quinone oxidoreductase subunit M [EC:7.1.1.2]	2	3	2	2	4	2	2
K00343	nuoN; NADH-quinone oxidoreductase subunit N [EC:7.1.1.2]	2	3	2	2	4	2	2
K00344	qor, CRYZ; NADPH:quinone reductase [EC:1.6.5.5]	1	4	2	2	1	3	3
K00347	nqrB; Na+-transporting NADH:ubiquinone oxidoreductase subunit B [EC:7.2.1.1]	0	0	0	1	0	1	0
K00360	nasB; assimilatory nitrate reductase electron transfer subunit [EC:1.7.99.-]	0	0	1	0	0	0	1
K00363	nirD; nitrite reductase (NADH) small subunit [EC:1.7.1.15]	0	0	1	1	1	1	0
K00365	uaZ; urate oxidase [EC:1.7.3.3]	0	0	0	0	0	1	0
K00367	narB; ferredoxin-nitrate reductase [EC:1.7.7.2]	0	0	0	1	0	1	0
K00368	nirK; nitrite reductase (NO-forming) [EC:1.7.2.1]	2	1	1	1	1	1	2
K00372	nasA; assimilatory nitrate reductase catalytic subunit [EC:1.7.99.-]	0	0	2	0	2	0	0
K00375	K00375; GntR family transcriptional regulator / MocR family aminotransferase	0	0	0	0	0	1	0
K00381	cysI; sulfite reductase (NADPH) hemoprotein beta-component [EC:1.8.1.2]	1	1	1	1	1	1	1
K00382	DLD, lpd, pdhD; dihydrolipoamide dehydrogenase [EC:1.8.1.4]	2	2	2	2	2	2	2
K00383	GSR, gor; glutathione reductase (NADPH) [EC:1.8.1.7]	0	1	0	0	1	0	0
K00384	trxB, TRR; thioredoxin reductase (NADPH) [EC:1.8.1.9]	2	1	3	2	3	8	3
K00389	yidH; putative membrane protein	0	1	1	0	0	0	0
K00390	cysH; phosphoadenosine phosphosulfate reductase [EC:1.8.4.8 1.8.4.10]	1	1	1	1	1	1	1
K00412	CYTB, petB; ubiquinol-cytochrome c reductase cytochrome b subunit	0	0	0	0	1	0	0
K00425	cydA; cytochrome bd ubiquinol oxidase subunit I [EC:7.1.1.7]	0	2	1	0	2	1	1
K00426	cydB; cytochrome bd ubiquinol oxidase subunit II [EC:7.1.1.7]	0	2	1	0	1	1	1
K00432	gpx, btuE, bsaA; glutathione peroxidase [EC:1.11.1.9]	1	2	2	1	1	2	1
K00433	cpo; non-heme chloroperoxidase [EC:1.11.1.10]	1	2	0	0	0	1	0
K00435	hemQ; hydrogen peroxide-dependent heme synthase [EC:1.3.98.5]	1	1	1	1	1	1	1
K00436	hoxH; NAD-reducing hydrogenase large subunit [EC:1.12.1.2]	0	0	0	1	0	0	0
K00441	frhB; coenzyme F420 hydrogenase subunit beta [EC:1.12.98.1]	1	1	1	1	1	1	1
K00451	HGD, hmgA; homogentisate 1,2-dioxygenase [EC:1.13.11.5]	1	1	0	0	1	0	0
K00457	HPD, hppD; 4-hydroxyphenylpyruvate dioxygenase [EC:1.13.11.27]	1	1	0	0	1	0	0
K00459	ncd2, npd; nitronate monooxygenase [EC:1.13.12.16]	1	1	1	0	0	1	1
K00467	E1.13.12.4; lactate 2-monooxygenase [EC:1.13.12.4]	0	0	2	0	0	1	0
K00471	BBOX1; gamma-butyrobetaine dioxygenase [EC:1.14.11.1]	1	0	0	0	0	0	0
K00477	PHYH; phytanoyl-CoA hydroxylase [EC:1.14.11.18]	0	1	1	0	1	0	0
K00479	gbcA; glycine betaine catabolism A	0	0	0	0	1	0	0
K00480	E1.14.13.1; salicylate hydroxylase [EC:1.14.13.1]	0	0	0	0	0	1	0
K00493	XANG; xanthocillin biosynthesis cytochrome P450 monooxygenase [EC:1.14.-.-]	0	0	0	0	1	0	0
K00496	alkB1_2, alkM; alkane 1-monooxygenase [EC:1.14.15.3]	1	0	0	1	0	0	0
K00500	phhA, PAH; phenylalanine-4-hydroxylase [EC:1.14.16.1]	1	1	0	0	1	0	0
K00507	SCD, desC; stearoyl-CoA desaturase (Delta-9 desaturase) [EC:1.14.19.1]	1	1	1	1	0	2	1
K00508	E1.14.19.3; linoleoyl-CoA desaturase [EC:1.14.19.3]	1	0	1	0	0	1	2
K00518	sodN; nickel superoxide dismutase [EC:1.15.1.1]	1	1	0	0	0	0	0
K00520	merA; mercuric reductase [EC:1.16.1.1]	0	0	0	1	0	0	0
K00523	ascD, ddhD, rfbI; CDP-4-dehydro-6-deoxyglucose reductase, E3 [EC:1.17.1.1]	0	0	0	1	0	0	0
K00525	E1.17.4.1A, nrdA, nrdE; ribonucleoside-diphosphate reductase alpha chain [EC:1.17.4.1]	1	1	1	2	1	2	1
K00526	E1.17.4.1B, nrdB, nrdF; ribonucleoside-diphosphate reductase beta chain [EC:1.17.4.1]	0	0	0	0	0	1	0
K00528	fpr; ferredoxin/flavodoxin---NADP+ reductase [EC:1.18.1.2 1.19.1.1]	0	1	0	0	0	0	0
K00529	hcaD; 3-phenylpropionate/trans-cinnamate dioxygenase ferredoxin reductase component [EC:1.18.1.3]	0	0	1	1	0	1	0
K00537	arsC; arsenate reductase (glutaredoxin) [EC:1.20.4.1]	1	1	1	0	0	0	0
K00548	metH, MTR; 5-methyltetrahydrofolate--homocysteine methyltransferase [EC:2.1.1.13]	1	1	2	1	1	1	1
K00549	metE; 5-methyltetrahydropteroyltriglutamate--homocysteine methyltransferase [EC:2.1.1.14]	1	1	0	1	1	0	0
K00554	trmD; tRNA (guanine37-N1)-methyltransferase [EC:2.1.1.228]	1	1	1	1	1	1	1
K00556	trmH; tRNA (guanosine-2'-O-)-methyltransferase [EC:2.1.1.34]	1	1	1	2	0	1	2
K00558	DNMT1, dcm; DNA (cytosine-5)-methyltransferase 1 [EC:2.1.1.37]	1	1	2	1	0	1	0
K00560	thyA, TYMS; thymidylate synthase [EC:2.1.1.45]	0	0	0	0	1	0	0
K00561	ermC, ermA; 23S rRNA (adenine-N6)-dimethyltransferase [EC:2.1.1.184]	0	1	0	0	1	1	0
K00564	rsmC; 16S rRNA (guanine1207-N2)-methyltransferase [EC:2.1.1.172]	2	2	1	1	0	1	1
K00566	mnmA, trmU; tRNA-uridine 2-sulfurtransferase [EC:2.8.1.13]	1	1	1	1	1	1	1
K00567	ogt, MGMT; methylated-DNA-[protein]-cysteine S-methyltransferase [EC:2.1.1.63]	1	3	1	1	1	3	2
K00568	ubiG; 2-polyprenyl-6-hydroxyphenyl methylase / 3-demethylubiquinone-9 3-methyltransferase [EC:2.1.1.222 2.1.1.64]	0	0	0	0	0	1	1
K00571	E2.1.1.72; site-specific DNA-methyltransferase (adenine-specific) [EC:2.1.1.72]	1	2	1	1	2	2	1
K00574	cfa; cyclopropane-fatty-acyl-phospholipid synthase [EC:2.1.1.79]	1	3	2	1	5	1	1
K00575	cheR; chemotaxis protein methyltransferase CheR [EC:2.1.1.80]	0	0	0	0	1	0	0
K00588	E2.1.1.104; caffeoyl-CoA O-methyltransferase [EC:2.1.1.104]	0	1	1	1	1	1	1
K00595	cobL-cbiET; precorrin-6B C5,15-methyltransferase / cobalt-precorrin-6B C5,C15-methyltransferase [EC:2.1.1.132 2.1.1.289 2.1.1.196]	0	0	1	1	0	0	0
K00596	E4.1.1.64; 2,2-dialkylglycine decarboxylase (pyruvate) [EC:4.1.1.64]	1	1	0	0	0	0	0
K00598	tam; trans-aconitate 2-methyltransferase [EC:2.1.1.144]	1	1	0	0	0	0	0
K00600	glyA, SHMT; glycine hydroxymethyltransferase [EC:2.1.2.1]	1	1	1	1	1	1	1
K00602	purH; phosphoribosylaminoimidazolecarboxamide formyltransferase / IMP cyclohydrolase [EC:2.1.2.3 3.5.4.10]	1	1	1	1	1	1	1
K00603	fctD; glutamate formiminotransferase / 5-formyltetrahydrofolate cyclo-ligase [EC:2.1.2.5 6.3.3.2]	0	1	1	1	1	0	1
K00604	MTFMT, fmt; methionyl-tRNA formyltransferase [EC:2.1.2.9]	1	1	1	1	1	1	1
K00605	gcvT, AMT; aminomethyltransferase [EC:2.1.2.10]	1	1	1	1	1	1	1
K00606	panB; 3-methyl-2-oxobutanoate hydroxymethyltransferase [EC:2.1.2.11]	1	1	1	1	1	1	1
K00609	pyrB, PYR2; aspartate carbamoyltransferase catalytic subunit [EC:2.1.3.2]	1	1	1	1	1	1	1
K00611	OTC, argF, argI; ornithine carbamoyltransferase [EC:2.1.3.3]	1	1	2	1	1	1	1
K00612	nodU; carbamoyltransferase [EC:2.1.3.-]	0	1	1	0	0	1	0
K00615	E2.2.1.1, tktA, tktB; transketolase [EC:2.2.1.1]	1	1	1	1	1	1	1
K00616	E2.2.1.2, talA, talB; transaldolase [EC:2.2.1.2]	1	1	1	1	1	1	1
K00620	argJ; glutamate N-acetyltransferase / amino-acid N-acetyltransferase [EC:2.3.1.35 2.3.1.1]	1	1	1	1	1	1	1
K00626	ACAT, atoB; acetyl-CoA C-acetyltransferase [EC:2.3.1.9]	10	11	10	12	8	13	13
K00627	DLAT, aceF, pdhC; pyruvate dehydrogenase E2 component (dihydrolipoamide acetyltransferase) [EC:2.3.1.12]	0	0	0	0	2	0	0
K00635	tgs, wax-dgat; diacylglycerol O-acyltransferase / wax synthase [EC:2.3.1.20 2.3.1.75]	3	3	4	5	0	2	4
K00640	cysE; serine O-acetyltransferase [EC:2.3.1.30]	0	0	0	0	0	1	0
K00641	metX; homoserine O-acetyltransferase/O-succinyltransferase [EC:2.3.1.31 2.3.1.46]	1	1	2	1	1	1	1
K00645	fabD, MCAT, MCT1; [acyl-carrier-protein] S-malonyltransferase [EC:2.3.1.39]	1	2	1	1	1	0	1
K00648	fabH; 3-oxoacyl-[acyl-carrier-protein] synthase III [EC:2.3.1.180]	1	1	1	1	1	0	2
K00652	bioF; 8-amino-7-oxononanoate synthase [EC:2.3.1.47]	1	1	1	1	0	1	1
K00655	plsC; 1-acyl-sn-glycerol-3-phosphate acyltransferase [EC:2.3.1.51]	3	4	4	3	4	4	3
K00657	speG, SAT; diamine N-acetyltransferase [EC:2.3.1.57]	0	0	0	1	1	0	0
K00658	DLST, sucB; 2-oxoglutarate dehydrogenase E2 component (dihydrolipoamide succinyltransferase) [EC:2.3.1.61]	1	1	2	1	1	1	1
K00661	maa; maltose O-acetyltransferase [EC:2.3.1.79]	3	2	2	1	1	3	1
K00663	aacA; aminoglycoside 6'-N-acetyltransferase [EC:2.3.1.82]	0	1	1	0	0	1	0
K00666	K00666; fatty-acyl-CoA synthase [EC:6.2.1.-]	8	7	6	5	8	8	8
K00674	dapD; 2,3,4,5-tetrahydropyridine-2,6-dicarboxylate N-succinyltransferase [EC:2.3.1.117]	1	1	0	1	1	1	1
K00677	lpxA; UDP-N-acetylglucosamine acyltransferase [EC:2.3.1.129]	0	0	0	0	0	0	1
K00681	ggt; gamma-glutamyltranspeptidase / glutathione hydrolase [EC:2.3.2.2 3.4.19.13]	0	2	2	0	1	1	0
K00683	QPCT; glutaminyl-peptide cyclotransferase [EC:2.3.2.5]	0	0	0	1	0	1	0
K00684	aat; leucyl/phenylalanyl-tRNA---protein transferase [EC:2.3.2.6]	1	1	1	1	1	1	1
K00688	PYG, glgP; glycogen phosphorylase [EC:2.4.1.1]	0	0	1	1	1	1	1
K00690	E2.4.1.7; sucrose phosphorylase [EC:2.4.1.7]	0	0	0	0	0	0	1
K00692	sacB; levansucrase [EC:2.4.1.10]	1	0	0	0	0	0	0
K00694	bcsA; cellulose synthase (UDP-forming) [EC:2.4.1.12]	0	0	0	0	0	0	1
K00697	otsA; trehalose 6-phosphate synthase [EC:2.4.1.15 2.4.1.347]	1	1	2	1	1	1	1
K00700	GBE1, glgB; 1,4-alpha-glucan branching enzyme [EC:2.4.1.18]	0	1	3	1	1	1	1
K00705	malQ; 4-alpha-glucanotransferase [EC:2.4.1.25]	0	1	1	2	1	1	1
K00721	DPM1; dolichol-phosphate mannosyltransferase [EC:2.4.1.83]	2	4	5	2	1	2	1
K00754	bshA; L-malate glycosyltransferase [EC:2.4.1.-]	0	1	0	0	0	0	0
K00756	pdp; pyrimidine-nucleoside phosphorylase [EC:2.4.2.2]	1	1	0	0	1	0	0
K00757	udp, UPP; uridine phosphorylase [EC:2.4.2.3]	0	0	1	0	0	1	0
K00759	APRT, apt; adenine phosphoribosyltransferase [EC:2.4.2.7]	1	1	1	0	1	1	1
K00760	hprT, hpt, HPRT1; hypoxanthine phosphoribosyltransferase [EC:2.4.2.8]	1	1	2	3	2	2	1
K00761	upp, UPRT; uracil phosphoribosyltransferase [EC:2.4.2.9]	1	1	1	0	1	0	1
K00762	pyrE; orotate phosphoribosyltransferase [EC:2.4.2.10]	1	1	1	1	1	1	1
K00763	pncB, NAPRT1; nicotinate phosphoribosyltransferase [EC:6.3.4.21]	0	1	0	1	1	0	0
K00764	purF, PPAT; amidophosphoribosyltransferase [EC:2.4.2.14]	1	1	2	1	1	1	1
K00765	hisG; ATP phosphoribosyltransferase [EC:2.4.2.17]	1	2	1	1	0	1	1
K00766	trpD; anthranilate phosphoribosyltransferase [EC:2.4.2.18]	1	1	1	1	1	1	1
K00767	nadC, QPRT; nicotinate-nucleotide pyrophosphorylase (carboxylating) [EC:2.4.2.19]	1	1	1	1	1	1	1
K00768	E2.4.2.21, cobU, cobT; nicotinate-nucleotide--dimethylbenzimidazole phosphoribosyltransferase [EC:2.4.2.21]	2	0	1	1	1	0	0
K00772	mtaP, MTAP; 5'-methylthioadenosine phosphorylase [EC:2.4.2.28]	1	1	1	1	0	2	0
K00773	tgt, QTRT1; queuine tRNA-ribosyltransferase [EC:2.4.2.29]	1	1	1	1	1	1	1
K00784	rnz; ribonuclease Z [EC:3.1.26.11]	2	2	1	2	2	1	1
K00786	GALT29A; beta-1,6-galactosyltransferase [EC:2.4.1.-]	0	0	0	2	1	1	2
K00788	thiE; thiamine-phosphate pyrophosphorylase [EC:2.5.1.3]	0	0	0	2	0	0	0
K00789	metK; S-adenosylmethionine synthetase [EC:2.5.1.6]	1	1	1	1	1	1	1
K00790	murA; UDP-N-acetylglucosamine 1-carboxyvinyltransferase [EC:2.5.1.7]	1	1	1	1	1	1	1
K00791	miaA, TRIT1; tRNA dimethylallyltransferase [EC:2.5.1.75]	1	1	1	1	1	1	1
K00793	ribE, RIB5; riboflavin synthase [EC:2.5.1.9]	1	1	1	1	1	1	1
K00794	ribH, RIB4; 6,7-dimethyl-8-ribityllumazine synthase [EC:2.5.1.78]	1	1	1	1	1	1	1
K00796	folP; dihydropteroate synthase [EC:2.5.1.15]	2	2	3	2	2	2	2
K00797	speE, SRM, SPE3; spermidine synthase [EC:2.5.1.16]	0	2	0	1	1	1	0
K00798	MMAB, pduO; cob(I)alamin adenosyltransferase [EC:2.5.1.17]	1	1	1	1	0	1	1
K00799	GST, gst; glutathione S-transferase [EC:2.5.1.18]	1	0	0	0	0	0	1
K00800	aroA; 3-phosphoshikimate 1-carboxyvinyltransferase [EC:2.5.1.19]	1	1	1	1	1	1	1
K00803	AGPS, agpS; alkyldihydroxyacetonephosphate synthase [EC:2.5.1.26]	1	2	1	1	1	2	1
K00805	hepST; heptaprenyl diphosphate synthase [EC:2.5.1.30]	1	1	1	1	1	1	1
K00806	uppS; undecaprenyl diphosphate synthase [EC:2.5.1.31]	1	1	1	1	1	1	1
K00812	aspB; aspartate aminotransferase [EC:2.6.1.1]	2	2	3	2	3	3	2
K00817	hisC; histidinol-phosphate aminotransferase [EC:2.6.1.9]	3	1	2	2	2	1	1
K00820	glmS, GFPT; glutamine---fructose-6-phosphate transaminase (isomerizing) [EC:2.6.1.16]	1	1	1	1	1	1	1
K00821	argD; acetylornithine/N-succinyldiaminopimelate aminotransferase [EC:2.6.1.11 2.6.1.17]	1	1	1	2	1	1	1
K00823	puuE; 4-aminobutyrate aminotransferase [EC:2.6.1.19]	1	1	0	0	0	1	1
K00826	E2.6.1.42, ilvE; branched-chain amino acid aminotransferase [EC:2.6.1.42]	2	2	2	2	2	2	2
K00830	AGXT; alanine-glyoxylate transaminase / serine-glyoxylate transaminase / serine-pyruvate transaminase [EC:2.6.1.44 2.6.1.45 2.6.1.51]	1	0	0	1	1	2	0
K00831	serC, PSAT1; phosphoserine aminotransferase [EC:2.6.1.52]	1	1	1	1	1	1	1
K00833	bioA; adenosylmethionine---8-amino-7-oxononanoate aminotransferase [EC:2.6.1.62]	1	1	1	1	0	1	1
K00836	ectB, dat; diaminobutyrate-2-oxoglutarate transaminase [EC:2.6.1.76]	2	1	0	0	1	0	1
K00842	#N/A	0	0	0	0	0	1	0
K00845	glk; glucokinase [EC:2.7.1.2]	2	3	0	3	4	3	3
K00847	E2.7.1.4, scrK; fructokinase [EC:2.7.1.4]	2	0	0	1	1	1	1
K00848	rhaB; rhamnulokinase [EC:2.7.1.5]	0	0	0	0	0	1	1
K00849	galK; galactokinase [EC:2.7.1.6]	1	1	1	1	1	1	1
K00850	pfkA, PFK; 6-phosphofructokinase 1 [EC:2.7.1.11]	0	0	0	1	0	0	0
K00851	E2.7.1.12, gntK, idnK; gluconokinase [EC:2.7.1.12]	0	0	0	1	0	2	0
K00852	rbsK, RBKS; ribokinase [EC:2.7.1.15]	0	1	1	0	2	0	0
K00854	xylB, XYLB; xylulokinase [EC:2.7.1.17]	2	2	2	2	0	3	1
K00857	tdk, TK; thymidine kinase [EC:2.7.1.21]	1	1	1	0	1	0	0
K00858	ppnK, NADK; NAD+ kinase [EC:2.7.1.23]	1	2	0	1	2	1	1
K00859	coaE; dephospho-CoA kinase [EC:2.7.1.24]	1	1	1	1	1	1	1
K00864	glpK, GK; glycerol kinase [EC:2.7.1.30]	2	2	2	2	2	2	3
K00865	glxK, garK; glycerate 2-kinase [EC:2.7.1.165]	1	1	1	1	1	1	1
K00867	coaA; type I pantothenate kinase [EC:2.7.1.33]	1	0	1	0	0	1	0
K00868	pdxK, pdxY; pyridoxine kinase [EC:2.7.1.35]	1	0	0	1	0	0	0
K00869	E2.7.1.36, MVK, mvaK1; mevalonate kinase [EC:2.7.1.36]	1	0	0	0	0	0	0
K00872	thrB; homoserine kinase [EC:2.7.1.39]	0	0	0	0	0	1	0
K00873	PK, pyk; pyruvate kinase [EC:2.7.1.40]	1	1	1	1	1	1	1
K00876	udk, UCK; uridine kinase [EC:2.7.1.48]	1	2	1	0	2	0	0
K00891	aroK, aroL; shikimate kinase [EC:2.7.1.71]	1	1	2	1	2	1	1
K00897	aphA; kanamycin kinase [EC:2.7.1.95]	1	0	0	0	0	0	0
K00919	ispE; 4-diphosphocytidyl-2-C-methyl-D-erythritol kinase [EC:2.7.1.148]	1	1	1	1	1	1	1
K00925	ackA; acetate kinase [EC:2.7.2.1]	0	0	0	1	2	0	1
K00926	arcC; carbamate kinase [EC:2.7.2.2]	0	0	1	0	0	0	0
K00927	PGK, pgk; phosphoglycerate kinase [EC:2.7.2.3]	1	1	1	1	1	1	1
K00928	lysC; aspartate kinase [EC:2.7.2.4]	1	1	1	1	1	1	1
K00930	argB; acetylglutamate kinase [EC:2.7.2.8]	1	1	1	1	1	1	1
K00931	proB; glutamate 5-kinase [EC:2.7.2.11]	1	1	1	1	1	1	1
K00936	pdtaS; two-component system, sensor histidine kinase PdtaS [EC:2.7.13.3]	1	1	1	1	1	1	1
K00937	ppk; polyphosphate kinase [EC:2.7.4.1]	1	1	1	1	1	1	1
K00939	adk, AK; adenylate kinase [EC:2.7.4.3]	2	1	1	1	2	1	1
K00940	ndk, NME; nucleoside-diphosphate kinase [EC:2.7.4.6]	1	1	1	1	1	1	1
K00942	E2.7.4.8, gmk; guanylate kinase [EC:2.7.4.8]	1	0	0	1	1	1	2
K00943	tmk, DTYMK; dTMP kinase [EC:2.7.4.9]	2	1	2	2	2	2	2
K00945	cmk; CMP/dCMP kinase [EC:2.7.4.25]	1	2	2	1	1	1	1
K00948	PRPS, prsA; ribose-phosphate pyrophosphokinase [EC:2.7.6.1]	1	1	1	1	1	1	1
K00949	thiN, TPK1, THI80; thiamine pyrophosphokinase [EC:2.7.6.2]	1	1	0	1	1	1	1
K00950	folK; 2-amino-4-hydroxy-6-hydroxymethyldihydropteridine diphosphokinase [EC:2.7.6.3]	1	1	1	1	1	1	1
K00951	relA; GTP pyrophosphokinase [EC:2.7.6.5]	1	1	1	1	1	1	2
K00954	E2.7.7.3A, coaD, kdtB; pantetheine-phosphate adenylyltransferase [EC:2.7.7.3]	1	1	1	1	1	1	1
K00955	cysNC; bifunctional enzyme CysN/CysC [EC:2.7.7.4 2.7.1.25]	2	2	2	2	1	2	1
K00956	cysN; sulfate adenylyltransferase subunit 1 [EC:2.7.7.4]	0	0	0	0	1	0	0
K00957	cysD; sulfate adenylyltransferase subunit 2 [EC:2.7.7.4]	1	1	1	1	1	1	1
K00962	pnp, PNPT1; polyribonucleotide nucleotidyltransferase [EC:2.7.7.8]	1	1	1	1	1	1	1
K00963	UGP2, galU, galF; UTP--glucose-1-phosphate uridylyltransferase [EC:2.7.7.9]	1	1	1	1	1	1	1
K00965	galT, GALT; UDPglucose--hexose-1-phosphate uridylyltransferase [EC:2.7.7.12]	1	1	1	2	1	1	2
K00966	GMPP; mannose-1-phosphate guanylyltransferase [EC:2.7.7.13]	2	2	2	2	2	2	1
K00968	PCYT1; choline-phosphate cytidylyltransferase [EC:2.7.7.15]	1	0	0	0	0	0	0
K00969	nadD; nicotinate-nucleotide adenylyltransferase [EC:2.7.7.18]	1	1	1	1	1	1	1
K00970	pcnB; poly(A) polymerase [EC:2.7.7.19]	1	1	1	1	1	1	1
K00973	rfbA, rmlA, rffH; glucose-1-phosphate thymidylyltransferase [EC:2.7.7.24]	1	1	0	1	1	1	1
K00975	glgC; glucose-1-phosphate adenylyltransferase [EC:2.7.7.27]	0	0	0	0	1	0	0
K00978	rfbF; glucose-1-phosphate cytidylyltransferase [EC:2.7.7.33]	1	0	1	0	0	0	0
K00980	tagD; glycerol-3-phosphate cytidylyltransferase [EC:2.7.7.39]	0	0	0	0	0	1	0
K00981	E2.7.7.41, CDS1, CDS2, cdsA; phosphatidate cytidylyltransferase [EC:2.7.7.41]	1	1	0	1	1	1	1
K00982	glnE; [glutamine synthetase] adenylyltransferase / [glutamine synthetase]-adenylyl-L-tyrosine phosphorylase [EC:2.7.7.42 2.7.7.89]	0	1	0	1	0	0	1
K00983	neuA, nnaC; N-acylneuraminate cytidylyltransferase [EC:2.7.7.43]	0	0	1	0	0	0	1
K00989	rph; ribonuclease PH [EC:2.7.7.56]	1	1	1	1	1	1	1
K00990	glnD; [protein-PII] uridylyltransferase [EC:2.7.7.59]	1	1	1	1	1	1	1
K00991	ispD; 2-C-methyl-D-erythritol 4-phosphate cytidylyltransferase [EC:2.7.7.60]	0	0	0	1	1	0	1
K00995	pgsA, PGS1; CDP-diacylglycerol---glycerol-3-phosphate 3-phosphatidyltransferase [EC:2.7.8.5]	2	2	2	2	2	2	2
K00997	acpS; holo-[acyl-carrier protein] synthase [EC:2.7.8.7]	1	1	1	1	2	2	0
K01000	mraY; phospho-N-acetylmuramoyl-pentapeptide-transferase [EC:2.7.8.13]	1	1	1	1	1	1	1
K01006	ppdK; pyruvate, orthophosphate dikinase [EC:2.7.9.1]	0	0	0	1	1	0	1
K01007	pps, ppsA; pyruvate, water dikinase [EC:2.7.9.2]	2	0	1	1	2	1	1
K01008	selD, SEPHS; selenide, water dikinase [EC:2.7.9.3]	1	0	0	0	0	0	1
K01012	bioB; biotin synthase [EC:2.8.1.6]	1	1	1	1	0	1	1
K01014	SULT1A; aryl sulfotransferase [EC:2.8.2.1]	1	1	0	0	0	2	0
K01039	gctA; glutaconate CoA-transferase, subunit A [EC:2.8.3.12]	1	1	1	1	0	1	1
K01040	gctB; glutaconate CoA-transferase, subunit B [EC:2.8.3.12]	1	1	1	0	0	0	0
K01042	selA; L-seryl-tRNA(Ser) seleniumtransferase [EC:2.9.1.1]	1	0	0	0	0	0	1
K01046	lip, TGL2; triacylglycerol lipase [EC:3.1.1.3]	0	0	1	2	0	0	0
K01048	pldB; lysophospholipase [EC:3.1.1.5]	1	0	0	0	0	0	0
K01053	gnl, RGN; gluconolactonase [EC:3.1.1.17]	2	0	0	1	0	1	1
K01055	pcaD; 3-oxoadipate enol-lactonase [EC:3.1.1.24]	1	1	1	1	0	1	1
K01056	PTH1, pth, spoVC; peptidyl-tRNA hydrolase, PTH1 family [EC:3.1.1.29]	1	1	1	1	1	1	1
K01057	PGLS, pgl, devB; 6-phosphogluconolactonase [EC:3.1.1.31]	1	1	1	0	1	0	1
K01061	E3.1.1.45; carboxymethylenebutenolidase [EC:3.1.1.45]	3	3	2	2	4	2	3
K01066	aes; acetyl esterase [EC:3.1.1.-]	1	1	1	1	1	2	0
K01069	gloB, gloC, HAGH; hydroxyacylglutathione hydrolase [EC:3.1.2.6]	3	3	2	2	2	2	3
K01077	E3.1.3.1, phoA, phoB; alkaline phosphatase [EC:3.1.3.1]	2	1	2	0	0	0	1
K01079	serB, PSPH; phosphoserine phosphatase [EC:3.1.3.3]	0	0	0	0	0	1	0
K01082	cysQ, MET22, BPNT1; 3'(2'), 5'-bisphosphate nucleotidase [EC:3.1.3.7]	2	3	2	2	2	2	2
K01087	otsB; trehalose 6-phosphate phosphatase [EC:3.1.3.12]	1	2	1	1	1	1	1
K01089	hisB; imidazoleglycerol-phosphate dehydratase / histidinol-phosphatase [EC:4.2.1.19 3.1.3.15]	1	1	0	0	0	0	1
K01090	E3.1.3.16; protein phosphatase [EC:3.1.3.16]	0	2	1	1	2	1	1
K01091	gph; phosphoglycolate phosphatase [EC:3.1.3.18]	0	1	1	1	1	2	0
K01092	E3.1.3.25, IMPA, suhB; myo-inositol-1(or 4)-monophosphatase [EC:3.1.3.25]	2	2	2	2	2	2	2
K01096	pgpB; phosphatidylglycerophosphatase B [EC:3.1.3.27 3.1.3.81 3.1.3.4 3.6.1.27]	0	0	0	0	0	1	0
K01104	E3.1.3.48; protein-tyrosine phosphatase [EC:3.1.3.48]	1	1	0	2	1	1	2
K01113	phoD; alkaline phosphatase D [EC:3.1.3.1]	2	1	2	3	0	4	0
K01114	plc; phospholipase C [EC:3.1.4.3]	0	1	1	0	0	2	0
K01118	acpD, azoR; FMN-dependent NADH-azoreductase [EC:1.7.1.17]	0	0	0	0	0	1	0
K01126	E3.1.4.46, glpQ, ugpQ; glycerophosphoryl diester phosphodiesterase [EC:3.1.4.46]	4	7	4	3	3	4	3
K01129	dgt; dGTPase [EC:3.1.5.1]	1	1	1	1	1	1	1
K01130	E3.1.6.1; arylsulfatase [EC:3.1.6.1]	4	2	3	3	1	3	2
K01133	betC; choline-sulfatase [EC:3.1.6.6]	0	0	0	1	0	0	0
K01139	spoT; GTP diphosphokinase / guanosine-3',5'-bis(diphosphate) 3'-diphosphatase [EC:2.7.6.5 3.1.7.2]	2	1	1	1	1	1	1
K01142	E3.1.11.2, xthA; exodeoxyribonuclease III [EC:3.1.11.2]	1	2	1	1	1	1	1
K01151	nfo; deoxyribonuclease IV [EC:3.1.21.2]	1	0	0	1	0	0	0
K01153	hsdR; type I restriction enzyme, R subunit [EC:3.1.21.3]	0	0	0	0	0	0	1
K01154	hsdS; type I restriction enzyme, S subunit [EC:3.1.21.3]	0	0	0	0	0	0	1
K01156	res; type III restriction enzyme [EC:3.1.21.5]	0	1	0	0	1	0	0
K01159	ruvC; crossover junction endodeoxyribonuclease RuvC [EC:3.1.22.4]	1	1	1	1	1	1	1
K01174	nuc; micrococcal nuclease [EC:3.1.31.1]	2	2	2	2	1	1	1
K01178	SGA1; glucoamylase [EC:3.2.1.3]	0	1	0	0	0	0	0
K01179	E3.2.1.4; endoglucanase [EC:3.2.1.4]	0	0	1	4	1	0	0
K01182	IMA, malL; oligo-1,6-glucosidase [EC:3.2.1.10]	1	0	1	0	0	0	0
K01187	malZ; alpha-glucosidase [EC:3.2.1.20]	1	1	0	1	1	1	1
K01190	lacZ; beta-galactosidase [EC:3.2.1.23]	2	1	2	1	1	2	1
K01191	MAN2C1; alpha-mannosidase [EC:3.2.1.24]	1	1	1	1	1	1	1
K01192	E3.2.1.25, MANBA, manB; beta-mannosidase [EC:3.2.1.25]	1	1	1	1	1	0	1
K01193	INV, sacA; beta-fructofuranosidase [EC:3.2.1.26]	1	0	0	0	0	0	0
K01194	TREH, treA, treF; alpha,alpha-trehalase [EC:3.2.1.28]	0	0	0	0	0	0	1
K01197	hya; hyaluronoglucosaminidase [EC:3.2.1.35]	0	0	0	1	0	0	0
K01206	FUCA; alpha-L-fucosidase [EC:3.2.1.51]	2	1	0	0	0	2	0
K01207	nagZ; beta-N-acetylhexosaminidase [EC:3.2.1.52]	0	1	0	0	0	1	1
K01214	ISA, treX; isoamylase [EC:3.2.1.68]	0	1	2	1	2	2	2
K01223	E3.2.1.86B, bglA; 6-phospho-beta-glucosidase [EC:3.2.1.86]	0	0	1	0	0	0	0
K01236	treZ, glgZ; maltooligosyltrehalose trehalohydrolase [EC:3.2.1.141]	0	1	1	0	1	1	1
K01239	iunH; purine nucleosidase [EC:3.2.2.1]	0	1	1	0	1	0	0
K01241	amn; AMP nucleosidase [EC:3.2.2.4]	0	0	0	0	1	0	0
K01246	tag; DNA-3-methyladenine glycosylase I [EC:3.2.2.20]	1	1	0	1	1	1	0
K01247	alkA; DNA-3-methyladenine glycosylase II [EC:3.2.2.21]	0	0	1	0	0	0	0
K01251	E3.3.1.1, ahcY; adenosylhomocysteinase [EC:3.3.1.1]	1	1	1	1	1	1	1
K01255	CARP, pepA; leucyl aminopeptidase [EC:3.4.11.1]	1	1	1	1	1	1	1
K01256	pepN; aminopeptidase N [EC:3.4.11.2]	0	0	0	0	0	1	0
K01259	pip; proline iminopeptidase [EC:3.4.11.5]	1	1	1	1	1	0	0
K01262	pepP; Xaa-Pro aminopeptidase [EC:3.4.11.9]	1	1	1	1	1	1	1
K01265	map; methionyl aminopeptidase [EC:3.4.11.18]	3	2	2	2	2	2	2
K01267	DNPEP; aspartyl aminopeptidase [EC:3.4.11.21]	2	1	1	1	1	1	1
K01269	E3.4.11.-; aminopeptidase [EC:3.4.11.-]	1	0	0	0	0	0	0
K01273	DPEP; membrane dipeptidase [EC:3.4.13.19]	1	0	1	0	0	0	0
K01278	DPP4, CD26; dipeptidyl-peptidase 4 [EC:3.4.14.5]	1	0	0	0	1	0	0
K01284	dcp; peptidyl-dipeptidase Dcp [EC:3.4.15.5]	0	0	0	0	1	0	0
K01286	E3.4.16.4; D-alanyl-D-alanine carboxypeptidase [EC:3.4.16.4]	1	4	1	1	0	1	5
K01310	CTRB; chymotrypsin [EC:3.4.21.1]	0	1	0	0	0	0	0
K01322	PREP; prolyl oligopeptidase [EC:3.4.21.26]	0	1	0	1	0	0	0
K01325	KLK1_2; tissue kallikrein [EC:3.4.21.35]	0	0	0	0	0	0	1
K01338	lon; ATP-dependent Lon protease [EC:3.4.21.53]	2	2	2	2	2	2	1
K01354	ptrB; oligopeptidase B [EC:3.4.21.83]	1	1	1	0	1	0	0
K01356	lexA; repressor LexA [EC:3.4.21.88]	1	1	1	1	1	1	1
K01358	clpP, CLPP; ATP-dependent Clp protease, protease subunit [EC:3.4.21.92]	4	3	3	2	3	3	2
K01389	MME, CD10; neprilysin [EC:3.4.24.11]	0	1	1	0	1	0	0
K01406	prtC; serralysin [EC:3.4.24.40]	0	1	1	0	0	0	0
K01409	KAE1, tsaD, QRI7; N6-L-threonylcarbamoyladenine synthase [EC:2.3.1.234]	2	2	3	2	2	2	2
K01420	fnr; CRP/FNR family transcriptional regulator, anaerobic regulatory protein	1	1	1	1	1	1	1
K01425	glsA, GLS; glutaminase [EC:3.5.1.2]	0	1	1	0	0	1	1
K01426	E3.5.1.4, amiE; amidase [EC:3.5.1.4]	6	2	3	2	5	4	2
K01428	ureC; urease subunit alpha [EC:3.5.1.5]	1	0	0	0	0	1	0
K01430	ureA; urease subunit gamma [EC:3.5.1.5]	1	0	0	0	0	1	0
K01431	UPB1, pydC; beta-ureidopropionase [EC:3.5.1.6]	0	1	0	0	0	0	0
K01433	purU; formyltetrahydrofolate deformylase [EC:3.5.1.10]	1	0	0	1	0	1	1
K01434	pac; penicillin G amidase [EC:3.5.1.11]	0	0	1	0	0	0	0
K01436	yhaA; amidohydrolase [EC:3.5.1.-]	0	1	0	0	0	1	0
K01439	dapE; succinyl-diaminopimelate desuccinylase [EC:3.5.1.18]	1	1	1	1	1	1	1
K01442	cbh; choloylglycine hydrolase [EC:3.5.1.24]	0	0	0	0	0	0	1
K01443	nagA, AMDHD2; N-acetylglucosamine-6-phosphate deacetylase [EC:3.5.1.25]	1	1	0	0	1	0	0
K01448	amiABC; N-acetylmuramoyl-L-alanine amidase [EC:3.5.1.28]	3	1	1	2	1	1	1
K01457	atzF; allophanate hydrolase [EC:3.5.1.54]	0	0	0	0	0	1	1
K01459	E3.5.1.77; N-carbamoyl-D-amino-acid hydrolase [EC:3.5.1.77]	0	1	0	0	0	0	0
K01462	PDF, def; peptide deformylase [EC:3.5.1.88]	1	1	1	1	3	1	1
K01463	bshB1; N-acetylglucosamine malate deacetylase 1 [EC:3.5.1.-]	0	0	0	1	0	0	0
K01464	DPYS, dht, hydA; dihydropyrimidinase [EC:3.5.2.2]	0	1	0	0	0	1	0
K01465	URA4, pyrC; dihydroorotase [EC:3.5.2.3]	1	2	1	1	1	2	1
K01470	E3.5.2.10; creatinine amidohydrolase [EC:3.5.2.10]	1	0	0	0	0	1	1
K01473	hyuA; N-methylhydantoinase A [EC:3.5.2.14]	2	2	2	3	3	2	3
K01474	hyuB; N-methylhydantoinase B [EC:3.5.2.14]	1	0	0	1	0	0	0
K01478	arcA; arginine deiminase [EC:3.5.3.6]	0	0	1	0	0	0	0
K01485	codA; cytosine/creatinine deaminase [EC:3.5.4.1 3.5.4.21]	0	1	0	0	1	1	1
K01486	ade; adenine deaminase [EC:3.5.4.2]	0	0	0	0	0	1	0
K01488	add, ADA; adenosine deaminase [EC:3.5.4.4]	1	4	1	0	1	5	0
K01489	cdd, CDA; cytidine deaminase [EC:3.5.4.5]	1	1	0	0	2	0	2
K01491	folD; methylenetetrahydrofolate dehydrogenase (NADP+) / methenyltetrahydrofolate cyclohydrolase [EC:1.5.1.5 3.5.4.9]	1	1	1	1	1	1	1
K01494	dcd; dCTP deaminase [EC:3.5.4.13]	1	1	1	1	1	1	1
K01495	GCH1, folE; GTP cyclohydrolase IA [EC:3.5.4.16]	1	1	2	1	1	1	1
K01496	hisI; phosphoribosyl-AMP cyclohydrolase [EC:3.5.4.19]	0	1	1	1	0	1	0
K01501	E3.5.5.1; nitrilase [EC:3.5.5.1]	0	1	1	0	0	0	1
K01507	ppa; inorganic pyrophosphatase [EC:3.6.1.1]	1	1	1	1	1	1	1
K01512	acyP; acylphosphatase [EC:3.6.1.7]	0	1	0	1	0	0	1
K01515	nudF; ADP-ribose pyrophosphatase [EC:3.6.1.13]	2	1	0	2	2	1	2
K01520	dut, DUT; dUTP pyrophosphatase [EC:3.6.1.23]	1	1	2	1	1	1	1
K01523	hisE; phosphoribosyl-ATP pyrophosphohydrolase [EC:3.6.1.31]	0	1	0	0	1	0	0
K01524	ppx-gppA; exopolyphosphatase / guanosine-5'-triphosphate,3'-diphosphate pyrophosphatase [EC:3.6.1.11 3.6.1.40]	2	2	2	2	2	2	2
K01533	copB; P-type Cu2+ transporter [EC:7.2.2.9]	1	2	1	2	10	1	1
K01534	zntA; Zn2+/Cd2+-exporting ATPase [EC:7.2.2.12 7.2.2.21]	0	0	0	0	1	0	0
K01537	ATP2C; P-type Ca2+ transporter type 2C [EC:7.2.2.10]	0	1	1	3	2	1	3
K01546	kdpA; potassium-transporting ATPase potassium-binding subunit	0	1	0	0	0	1	0
K01547	kdpB; potassium-transporting ATPase ATP-binding subunit [EC:7.2.2.6]	0	1	0	0	0	1	0
K01548	kdpC; potassium-transporting ATPase KdpC subunit	0	1	0	0	0	1	0
K01551	arsA, ASNA1, GET3; arsenite/tail-anchored protein-transporting ATPase [EC:7.3.2.7 7.3.-.-]	1	1	1	2	0	1	1
K01555	FAH, fahA; fumarylacetoacetase [EC:3.7.1.2]	1	0	0	0	1	0	0
K01556	KYNU, kynU; kynureninase [EC:3.7.1.3]	1	1	0	0	0	0	0
K01560	E3.8.1.2; 2-haloacid dehalogenase [EC:3.8.1.2]	0	0	0	0	0	1	0
K01561	dehH; haloacetate dehalogenase [EC:3.8.1.3]	0	0	0	0	0	1	0
K01563	dhaA; haloalkane dehalogenase [EC:3.8.1.5]	2	1	1	1	1	1	0
K01574	adc; acetoacetate decarboxylase [EC:4.1.1.4]	1	0	0	0	0	0	0
K01575	alsD, budA, aldC; acetolactate decarboxylase [EC:4.1.1.5]	0	1	0	0	0	1	1
K01576	mdlC; benzoylformate decarboxylase [EC:4.1.1.7]	0	0	0	0	1	0	0
K01578	MLYCD; malonyl-CoA decarboxylase [EC:4.1.1.9]	0	0	0	0	0	1	0
K01579	panD; aspartate 1-decarboxylase [EC:4.1.1.11]	1	1	1	1	1	1	1
K01580	E4.1.1.15, gadB, gadA, GAD; glutamate decarboxylase [EC:4.1.1.15]	0	1	1	2	0	2	1
K01586	lysA; diaminopimelate decarboxylase [EC:4.1.1.20]	1	1	1	1	1	1	1
K01588	purE; 5-(carboxyamino)imidazole ribonucleotide mutase [EC:5.4.99.18]	1	1	0	2	1	1	1
K01589	purK; 5-(carboxyamino)imidazole ribonucleotide synthase [EC:6.3.4.18]	0	1	0	1	1	1	1
K01591	pyrF; orotidine-5'-phosphate decarboxylase [EC:4.1.1.23]	2	1	1	1	1	1	1
K01593	DDC, TDC; aromatic-L-amino-acid/L-tryptophan decarboxylase [EC:4.1.1.28 4.1.1.105]	2	2	1	1	1	1	1
K01595	ppc; phosphoenolpyruvate carboxylase [EC:4.1.1.31]	0	1	0	0	1	1	1
K01596	E4.1.1.32, pckA, PCK; phosphoenolpyruvate carboxykinase (GTP) [EC:4.1.1.32]	2	1	1	1	1	1	1
K01599	hemE, UROD; uroporphyrinogen decarboxylase [EC:4.1.1.37]	1	1	1	1	1	1	1
K01607	pcaC; 4-carboxymuconolactone decarboxylase [EC:4.1.1.44]	1	2	1	0	0	1	0
K01609	trpC; indole-3-glycerol phosphate synthase [EC:4.1.1.48]	1	1	2	1	1	1	1
K01611	speD, AMD1; S-adenosylmethionine decarboxylase [EC:4.1.1.50]	0	0	0	0	0	0	1
K01613	psd, PISD; phosphatidylserine decarboxylase [EC:4.1.1.65]	0	0	1	0	0	0	0
K01619	deoC, DERA; deoxyribose-phosphate aldolase [EC:4.1.2.4]	1	1	1	0	1	1	0
K01620	ltaE; threonine aldolase [EC:4.1.2.48]	1	1	1	2	1	1	1
K01621	xfp, xpk; xylulose-5-phosphate/fructose-6-phosphate phosphoketolase [EC:4.1.2.9 4.1.2.22]	0	0	0	3	2	0	1
K01622	K01622; fructose 1,6-bisphosphate aldolase/phosphatase [EC:4.1.2.13 3.1.3.11]	0	0	0	1	0	0	0
K01623	ALDO; fructose-bisphosphate aldolase, class I [EC:4.1.2.13]	1	1	1	0	1	1	1
K01626	E2.5.1.54, aroF, aroG, aroH; 3-deoxy-7-phosphoheptulonate synthase [EC:2.5.1.54]	1	1	1	1	1	1	1
K01628	fucA; L-fuculose-phosphate aldolase [EC:4.1.2.17]	0	1	0	1	0	1	3
K01633	folB; 7,8-dihydroneopterin aldolase/epimerase/oxygenase [EC:4.1.2.25 5.1.99.8 1.13.11.81]	1	1	1	1	1	1	1
K01634	SGPL1, DPL1; sphinganine-1-phosphate aldolase [EC:4.1.2.27]	3	2	2	1	1	2	2
K01640	E4.1.3.4, HMGCL, hmgL; hydroxymethylglutaryl-CoA lyase [EC:4.1.3.4]	2	1	1	0	0	1	0
K01644	citE; citrate lyase subunit beta / citryl-CoA lyase [EC:4.1.3.34]	2	2	1	1	3	3	4
K01647	CS, gltA; citrate synthase [EC:2.3.3.1]	3	3	2	1	3	3	1
K01649	leuA, IMS; 2-isopropylmalate synthase [EC:2.3.3.13]	2	3	3	2	2	2	3
K01652	E2.2.1.6L, ilvB, ilvG, ilvI; acetolactate synthase I/II/III large subunit [EC:2.2.1.6]	2	2	2	3	1	2	2
K01653	E2.2.1.6S, ilvH, ilvN; acetolactate synthase I/III small subunit [EC:2.2.1.6]	1	1	1	1	1	1	1
K01654	neuB, nnaB; N-acetylneuraminate synthase [EC:2.5.1.56]	0	0	1	0	0	0	1
K01657	trpE; anthranilate synthase component I [EC:4.1.3.27]	1	1	1	1	1	1	1
K01658	trpG; anthranilate synthase component II [EC:4.1.3.27]	1	1	1	2	1	1	1
K01661	menB; naphthoate synthase [EC:4.1.3.36]	1	1	1	1	1	1	1
K01662	dxs; 1-deoxy-D-xylulose-5-phosphate synthase [EC:2.2.1.7]	1	1	1	1	1	1	1
K01665	pabB; para-aminobenzoate synthetase component I [EC:2.6.1.85]	1	1	1	1	0	1	1
K01666	mhpE; 4-hydroxy 2-oxovalerate aldolase [EC:4.1.3.39]	0	0	0	1	0	1	0
K01669	phrB; deoxyribodipyrimidine photo-lyase [EC:4.1.99.3]	1	2	1	1	1	1	1
K01673	cynT, can; carbonic anhydrase [EC:4.2.1.1]	1	1	1	1	1	0	3
K01676	E4.2.1.2A, fumA, fumB; fumarate hydratase, class I [EC:4.2.1.2]	1	1	1	1	1	1	1
K01679	E4.2.1.2B, fumC, FH; fumarate hydratase, class II [EC:4.2.1.2]	1	1	1	1	1	1	1
K01681	ACO, acnA; aconitate hydratase [EC:4.2.1.3]	1	1	3	1	2	2	1
K01687	ilvD; dihydroxy-acid dehydratase [EC:4.2.1.9]	2	1	1	1	1	1	2
K01689	ENO, eno; enolase [EC:4.2.1.11]	1	1	1	1	1	1	1
K01692	paaF, echA; enoyl-CoA hydratase [EC:4.2.1.17]	15	14	15	13	8	18	18
K01693	hisB; imidazoleglycerol-phosphate dehydratase [EC:4.2.1.19]	0	0	0	1	1	1	0
K01695	trpA; tryptophan synthase alpha chain [EC:4.2.1.20]	1	1	1	1	1	1	1
K01696	trpB; tryptophan synthase beta chain [EC:4.2.1.20]	1	1	1	1	1	1	1
K01697	CBS; cystathionine beta-synthase [EC:4.2.1.22]	1	1	0	0	1	0	0
K01698	hemB, ALAD; porphobilinogen synthase [EC:4.2.1.24]	1	1	1	1	1	1	1
K01703	leuC, IPMI-L; 3-isopropylmalate/(R)-2-methylmalate dehydratase large subunit [EC:4.2.1.33 4.2.1.35]	1	1	1	1	2	1	1
K01704	leuD, IPMI-S; 3-isopropylmalate/(R)-2-methylmalate dehydratase small subunit [EC:4.2.1.33 4.2.1.35]	1	2	1	1	1	1	1
K01709	rfbG; CDP-glucose 4,6-dehydratase [EC:4.2.1.45]	1	0	1	0	0	0	0
K01710	rfbB, rmlB, rffG; dTDP-glucose 4,6-dehydratase [EC:4.2.1.46]	3	2	3	4	4	3	2
K01711	gmd, GMDS; GDPmannose 4,6-dehydratase [EC:4.2.1.47]	1	1	1	1	1	1	1
K01714	dapA; 4-hydroxy-tetrahydrodipicolinate synthase [EC:4.3.3.7]	1	2	2	1	1	2	1
K01715	crt; enoyl-CoA hydratase [EC:4.2.1.17]	0	0	0	0	0	0	1
K01719	hemD, UROS; uroporphyrinogen-III synthase [EC:4.2.1.75]	0	0	1	1	2	1	0
K01724	PCBD, phhB; 4a-hydroxytetrahydrobiopterin dehydratase [EC:4.2.1.96]	1	1	1	0	1	1	1
K01733	thrC; threonine synthase [EC:4.2.3.1]	1	1	1	1	2	1	1
K01735	aroB; 3-dehydroquinate synthase [EC:4.2.3.4]	0	3	1	1	0	1	1
K01736	aroC; chorismate synthase [EC:4.2.3.5]	1	1	1	1	1	1	1
K01737	queD, ptpS, PTS; 6-pyruvoyltetrahydropterin/6-carboxytetrahydropterin synthase [EC:4.2.3.12 4.1.2.50]	1	0	1	1	0	0	1
K01738	cysK; cysteine synthase [EC:2.5.1.47]	1	0	0	0	0	0	0
K01739	metB; cystathionine gamma-synthase [EC:2.5.1.48]	2	2	1	1	3	1	1
K01740	metY; O-acetylhomoserine (thiol)-lyase [EC:2.5.1.49]	0	1	1	1	1	1	1
K01749	hemC, HMBS; hydroxymethylbilane synthase [EC:2.5.1.61]	1	1	1	1	1	1	1
K01751	E4.3.1.15; diaminopropionate ammonia-lyase [EC:4.3.1.15]	0	1	0	0	0	0	0
K01754	E4.3.1.19, ilvA, tdcB; threonine dehydratase [EC:4.3.1.19]	1	1	0	1	2	1	0
K01755	argH, ASL; argininosuccinate lyase [EC:4.3.2.1]	1	1	1	1	1	1	1
K01756	purB, ADSL; adenylosuccinate lyase [EC:4.3.2.2]	1	1	1	1	1	1	1
K01759	GLO1, gloA; lactoylglutathione lyase [EC:4.4.1.5]	2	0	0	0	1	1	1
K01768	E4.6.1.1; adenylate cyclase [EC:4.6.1.1]	3	5	4	2	2	4	2
K01770	ispF; 2-C-methyl-D-erythritol 2,4-cyclodiphosphate synthase [EC:4.6.1.12]	2	2	2	1	1	2	1
K01772	hemH, FECH; protoporphyrin/coproporphyrin ferrochelatase [EC:4.99.1.1 4.99.1.9]	1	1	1	1	1	1	1
K01775	alr; alanine racemase [EC:5.1.1.1]	1	1	1	1	1	1	1
K01776	murI; glutamate racemase [EC:5.1.1.3]	1	1	1	1	1	1	1
K01778	dapF; diaminopimelate epimerase [EC:5.1.1.7]	1	1	1	1	1	1	1
K01779	racD; aspartate racemase [EC:5.1.1.13]	0	0	0	0	1	1	0
K01783	rpe, RPE; ribulose-phosphate 3-epimerase [EC:5.1.3.1]	1	1	1	1	1	1	1
K01784	galE, GALE; UDP-glucose 4-epimerase [EC:5.1.3.2]	4	5	4	3	2	2	3
K01785	galM, GALM; aldose 1-epimerase [EC:5.1.3.3]	1	0	1	0	0	0	0
K01790	rfbC, rmlC; dTDP-4-dehydrorhamnose 3,5-epimerase [EC:5.1.3.13]	0	0	1	0	0	0	0
K01791	wecB; UDP-N-acetylglucosamine 2-epimerase (non-hydrolysing) [EC:5.1.3.14]	0	0	0	1	2	1	0
K01796	E5.1.99.4, AMACR, mcr; alpha-methylacyl-CoA racemase [EC:5.1.99.4]	2	2	2	2	1	2	2
K01799	nicE, maiA; maleate isomerase [EC:5.2.1.1]	0	2	0	0	0	0	2
K01802	E5.2.1.8; peptidylprolyl isomerase [EC:5.2.1.8]	2	3	3	3	3	3	3
K01803	TPI, tpiA; triosephosphate isomerase (TIM) [EC:5.3.1.1]	1	1	1	1	1	1	1
K01805	xylA; xylose isomerase [EC:5.3.1.5]	1	0	0	0	0	1	0
K01807	rpiA; ribose 5-phosphate isomerase A [EC:5.3.1.6]	0	0	0	1	0	0	1
K01808	rpiB; ribose 5-phosphate isomerase B [EC:5.3.1.6]	1	2	1	1	2	1	0
K01809	manA, MPI; mannose-6-phosphate isomerase [EC:5.3.1.8]	0	1	1	0	0	0	0
K01810	GPI, pgi; glucose-6-phosphate isomerase [EC:5.3.1.9]	1	1	1	1	1	1	1
K01814	hisA; phosphoribosylformimino-5-aminoimidazole carboxamide ribotide isomerase [EC:5.3.1.16]	1	1	1	1	1	1	1
K01817	trpF; phosphoribosylanthranilate isomerase [EC:5.3.1.24]	2	1	1	1	1	1	1
K01820	rhaA; L-rhamnose isomerase / sugar isomerase [EC:5.3.1.14 5.3.1.-]	0	0	0	0	0	1	1
K01822	E5.3.3.1; steroid Delta-isomerase [EC:5.3.3.1]	1	1	1	1	0	2	1
K01823	idi, IDI; isopentenyl-diphosphate Delta-isomerase [EC:5.3.3.2]	1	0	1	1	0	1	1
K01834	PGAM, gpmA; 2,3-bisphosphoglycerate-dependent phosphoglycerate mutase [EC:5.4.2.11]	1	1	2	2	1	1	2
K01835	pgm; phosphoglucomutase [EC:5.4.2.2]	0	1	2	1	1	1	0
K01838	pgmB; beta-phosphoglucomutase [EC:5.4.2.6]	1	0	1	0	0	0	1
K01840	manB; phosphomannomutase [EC:5.4.2.8]	2	1	1	1	1	1	1
K01845	hemL; glutamate-1-semialdehyde 2,1-aminomutase [EC:5.4.3.8]	2	1	2	1	1	3	1
K01847	MUT; methylmalonyl-CoA mutase [EC:5.4.99.2]	1	2	1	1	1	2	1
K01848	E5.4.99.2A, mcmA1; methylmalonyl-CoA mutase, N-terminal domain [EC:5.4.99.2]	1	1	1	1	1	1	0
K01849	E5.4.99.2B, mcmA2; methylmalonyl-CoA mutase, C-terminal domain [EC:5.4.99.2]	1	0	0	1	1	0	0
K01854	glf; UDP-galactopyranose mutase [EC:5.4.99.9]	0	0	0	1	1	1	1
K01858	INO1, ISYNA1; myo-inositol-1-phosphate synthase [EC:5.5.1.4]	1	1	1	1	1	1	1
K01866	YARS, tyrS; tyrosyl-tRNA synthetase [EC:6.1.1.1]	1	1	1	1	1	1	1
K01867	WARS, trpS; tryptophanyl-tRNA synthetase [EC:6.1.1.2]	1	1	1	1	1	1	1
K01868	TARS, thrS; threonyl-tRNA synthetase [EC:6.1.1.3]	1	1	1	1	1	1	1
K01869	LARS, leuS; leucyl-tRNA synthetase [EC:6.1.1.4]	1	1	2	1	1	1	1
K01870	IARS, ileS; isoleucyl-tRNA synthetase [EC:6.1.1.5]	1	1	1	1	1	1	1
K01872	AARS, alaS; alanyl-tRNA synthetase [EC:6.1.1.7]	1	1	1	1	1	1	1
K01873	VARS, valS; valyl-tRNA synthetase [EC:6.1.1.9]	1	1	1	1	1	1	1
K01874	MARS, metG; methionyl-tRNA synthetase [EC:6.1.1.10]	1	1	1	1	1	1	1
K01875	SARS, serS; seryl-tRNA synthetase [EC:6.1.1.11]	1	1	1	1	1	1	1
K01876	DARS2, aspS; aspartyl-tRNA synthetase [EC:6.1.1.12]	1	1	2	1	1	1	1
K01880	GARS, glyS1; glycyl-tRNA synthetase [EC:6.1.1.14]	1	1	1	1	1	1	1
K01881	PARS, proS; prolyl-tRNA synthetase [EC:6.1.1.15]	1	1	1	1	1	1	1
K01883	CARS, cysS; cysteinyl-tRNA synthetase [EC:6.1.1.16]	3	3	2	2	2	2	2
K01885	EARS, gltX; glutamyl-tRNA synthetase [EC:6.1.1.17]	2	2	2	2	2	2	2
K01886	QARS, glnS; glutaminyl-tRNA synthetase [EC:6.1.1.18]	1	0	0	0	0	0	0
K01887	RARS, argS; arginyl-tRNA synthetase [EC:6.1.1.19]	1	1	1	1	1	1	1
K01889	FARSA, pheS; phenylalanyl-tRNA synthetase alpha chain [EC:6.1.1.20]	1	1	1	1	1	1	1
K01890	FARSB, pheT; phenylalanyl-tRNA synthetase beta chain [EC:6.1.1.20]	1	1	1	1	1	1	1
K01892	HARS, hisS; histidyl-tRNA synthetase [EC:6.1.1.21]	1	1	1	1	1	1	1
K01895	ACSS1_2, acs; acetyl-CoA synthetase [EC:6.2.1.1]	1	1	3	1	2	1	1
K01897	ACSL, fadD; long-chain acyl-CoA synthetase [EC:6.2.1.3]	7	6	4	5	5	3	3
K01902	sucD; succinyl-CoA synthetase alpha subunit [EC:6.2.1.5]	1	1	1	1	1	1	1
K01903	sucC; succinyl-CoA synthetase beta subunit [EC:6.2.1.5]	1	1	1	1	1	1	1
K01907	AACS, acsA; acetoacetyl-CoA synthetase [EC:6.2.1.16]	1	1	0	0	1	1	1
K01908	ACSS3, prpE; propionyl-CoA synthetase [EC:6.2.1.17]	0	0	0	0	0	0	1
K01911	menE; o-succinylbenzoate---CoA ligase [EC:6.2.1.26]	1	1	1	2	1	1	1
K01912	paaK; phenylacetate-CoA ligase [EC:6.2.1.30]	0	0	0	0	0	0	1
K01915	glnA, GLUL; glutamine synthetase [EC:6.3.1.2]	4	5	3	4	2	3	3
K01916	nadE; NAD+ synthase [EC:6.3.1.5]	0	0	0	0	1	1	0
K01918	panC; pantoate--beta-alanine ligase [EC:6.3.2.1]	1	1	1	1	1	1	1
K01919	gshA; glutamate--cysteine ligase [EC:6.3.2.2]	0	0	0	1	0	0	0
K01921	ddl; D-alanine-D-alanine ligase [EC:6.3.2.4]	2	3	2	2	2	2	2
K01923	purC; phosphoribosylaminoimidazole-succinocarboxamide synthase [EC:6.3.2.6]	2	2	2	2	2	2	2
K01924	murC; UDP-N-acetylmuramate--alanine ligase [EC:6.3.2.8]	1	1	1	1	1	1	1
K01925	murD; UDP-N-acetylmuramoylalanine--D-glutamate ligase [EC:6.3.2.9]	1	1	1	1	1	1	1
K01926	rex; redox-sensing transcriptional repressor	1	1	1	1	1	1	1
K01928	murE; UDP-N-acetylmuramoyl-L-alanyl-D-glutamate--2,6-diaminopimelate ligase [EC:6.3.2.13]	1	1	1	1	1	1	1
K01929	murF; UDP-N-acetylmuramoyl-tripeptide--D-alanyl-D-alanine ligase [EC:6.3.2.10]	1	1	0	1	1	1	1
K01933	purM; phosphoribosylformylglycinamidine cyclo-ligase [EC:6.3.3.1]	1	1	1	1	1	1	1
K01934	MTHFS; 5-formyltetrahydrofolate cyclo-ligase [EC:6.3.3.2]	2	0	0	0	0	1	0
K01935	bioD; dethiobiotin synthetase [EC:6.3.3.3]	1	0	0	0	0	0	0
K01937	pyrG, CTPS; CTP synthase [EC:6.3.4.2]	1	1	1	1	1	1	1
K01939	purA, ADSS; adenylosuccinate synthase [EC:6.3.4.4]	1	1	1	1	1	1	1
K01940	argG, ASS1; argininosuccinate synthase [EC:6.3.4.5]	1	1	1	1	1	1	1
K01941	E6.3.4.6; urea carboxylase [EC:6.3.4.6]	0	0	0	0	0	1	0
K01945	purD; phosphoribosylamine---glycine ligase [EC:6.3.4.13]	1	1	1	1	1	1	1
K01950	E6.3.5.1, NADSYN1, QNS1, nadE; NAD+ synthase (glutamine-hydrolysing) [EC:6.3.5.1]	1	1	1	1	0	1	1
K01951	guaA, GMPS; GMP synthase (glutamine-hydrolysing) [EC:6.3.5.2]	1	1	2	1	1	2	1
K01952	PFAS, purL; phosphoribosylformylglycinamidine synthase [EC:6.3.5.3]	2	2	2	2	2	2	2
K01953	asnB, ASNS; asparagine synthase (glutamine-hydrolysing) [EC:6.3.5.4]	0	2	2	2	0	1	0
K01955	carB, CPA2; carbamoyl-phosphate synthase large subunit [EC:6.3.5.5]	1	2	1	1	1	1	1
K01956	carA, CPA1; carbamoyl-phosphate synthase small subunit [EC:6.3.5.5]	1	1	1	1	1	1	1
K01962	accA; acetyl-CoA carboxylase carboxyl transferase subunit alpha [EC:6.4.1.2 2.1.3.15]	0	1	1	0	0	0	0
K01965	PCCA, pccA; propionyl-CoA carboxylase alpha chain [EC:6.4.1.3]	0	0	0	1	0	0	0
K01966	PCCB, pccB; propionyl-CoA carboxylase beta chain [EC:6.4.1.3 2.1.3.15]	1	1	2	1	1	1	1
K01968	E6.4.1.4A; 3-methylcrotonyl-CoA carboxylase alpha subunit [EC:6.4.1.4]	0	0	0	0	1	0	1
K01969	E6.4.1.4B; 3-methylcrotonyl-CoA carboxylase beta subunit [EC:6.4.1.4]	0	0	0	0	0	0	1
K01971	ligD; bifunctional non-homologous end joining protein LigD [EC:6.5.1.1]	3	6	3	2	2	3	2
K01972	E6.5.1.2, ligA, ligB; DNA ligase (NAD+) [EC:6.5.1.2]	1	1	2	1	1	1	1
K01975	thpR; RNA 2',3'-cyclic 3'-phosphodiesterase [EC:3.1.4.58]	0	0	0	1	0	1	1
K01990	ABC-2.A; ABC-2 type transport system ATP-binding protein	11	15	16	7	12	15	13
K01992	ABC-2.P; ABC-2 type transport system permease protein	7	11	7	5	11	8	10
K01995	livG; branched-chain amino acid transport system ATP-binding protein	10	8	6	4	3	5	2
K01996	livF; branched-chain amino acid transport system ATP-binding protein	4	4	3	2	3	6	3
K01997	livH; branched-chain amino acid transport system permease protein	6	5	6	2	2	4	2
K01998	livM; branched-chain amino acid transport system permease protein	4	3	2	1	1	3	1
K01999	livK; branched-chain amino acid transport system substrate-binding protein	1	2	2	2	1	2	1
K02003	ABC.CD.A; putative ABC transport system ATP-binding protein	6	3	2	5	6	5	2
K02004	ABC.CD.P; putative ABC transport system permease protein	2	4	3	3	5	3	4
K02006	cbiO; cobalt/nickel transport system ATP-binding protein	1	1	0	1	0	1	0
K02007	cbiM; cobalt/nickel transport system permease protein	2	1	0	1	1	1	0
K02008	cbiQ; cobalt/nickel transport system permease protein	1	1	0	0	0	1	0
K02009	cbiN; cobalt/nickel transport protein	0	1	0	0	0	0	0
K02010	afuC, fbpC; iron(III) transport system ATP-binding protein [EC:7.2.2.7]	1	2	1	1	1	2	1
K02011	afuB, fbpB; iron(III) transport system permease protein	2	2	2	2	2	2	2
K02012	afuA, fbpA; iron(III) transport system substrate-binding protein	1	2	1	1	1	1	1
K02013	ABC.FEV.A; iron complex transport system ATP-binding protein [EC:7.2.2.-]	4	4	1	2	4	3	3
K02014	TC.FEV.OM; iron complex outermembrane recepter protein	0	0	2	0	0	0	0
K02015	ABC.FEV.P; iron complex transport system permease protein	2	3	1	1	4	3	1
K02016	ABC.FEV.S; iron complex transport system substrate-binding protein	2	5	2	1	3	3	1
K02017	modC; molybdate transport system ATP-binding protein [EC:7.3.2.5]	2	2	3	1	3	2	2
K02018	modB; molybdate transport system permease protein	0	0	0	1	0	0	0
K02020	modA; molybdate transport system substrate-binding protein	1	1	1	1	1	1	1
K02021	ABC.MR; putative ABC transport system ATP-binding protein	1	1	0	1	1	1	1
K02025	ABC.MS.P; multiple sugar transport system permease protein	0	2	1	1	1	2	2
K02026	ABC.MS.P1; multiple sugar transport system permease protein	1	2	1	1	1	2	2
K02027	ABC.MS.S; multiple sugar transport system substrate-binding protein	3	1	0	0	0	1	1
K02028	ABC.PA.A; polar amino acid transport system ATP-binding protein [EC:7.4.2.1]	2	1	1	0	2	1	1
K02029	ABC.PA.P; polar amino acid transport system permease protein	2	1	1	0	2	1	2
K02030	ABC.PA.S; polar amino acid transport system substrate-binding protein	1	1	1	0	2	1	1
K02031	ddpD; peptide/nickel transport system ATP-binding protein	1	1	1	1	3	1	3
K02032	ddpF; peptide/nickel transport system ATP-binding protein	2	1	1	1	3	1	3
K02033	ABC.PE.P; peptide/nickel transport system permease protein	2	1	1	1	3	1	3
K02034	ABC.PE.P1; peptide/nickel transport system permease protein	2	1	0	1	3	1	3
K02035	ABC.PE.S; peptide/nickel transport system substrate-binding protein	0	5	3	0	6	2	0
K02036	pstB; phosphate transport system ATP-binding protein [EC:7.3.2.1]	1	1	1	2	1	2	2
K02037	pstC; phosphate transport system permease protein	1	1	1	1	1	2	2
K02038	pstA; phosphate transport system permease protein	1	1	1	2	1	2	2
K02039	phoU; phosphate transport system protein	2	1	2	1	1	1	2
K02040	pstS; phosphate transport system substrate-binding protein	1	2	1	2	2	2	2
K02041	phnC; phosphonate transport system ATP-binding protein [EC:7.3.2.2]	1	0	0	0	0	0	0
K02042	phnE; phosphonate transport system permease protein	1	0	0	0	0	0	0
K02044	phnD; phosphonate transport system substrate-binding protein	1	0	0	0	0	0	0
K02045	cysA; sulfate/thiosulfate transport system ATP-binding protein [EC:7.3.2.3]	0	0	1	0	0	1	0
K02046	cysU; sulfate/thiosulfate transport system permease protein	0	0	1	0	0	1	0
K02047	cysW; sulfate/thiosulfate transport system permease protein	0	0	1	0	0	1	0
K02048	cysP; sulfate/thiosulfate transport system substrate-binding protein	0	0	1	0	0	1	0
K02049	ABC.SN.A; NitT/TauT family transport system ATP-binding protein	0	2	1	2	1	3	0
K02050	ABC.SN.P; NitT/TauT family transport system permease protein	0	1	0	2	1	1	0
K02051	ABC.SN.S; NitT/TauT family transport system substrate-binding protein	0	0	0	1	1	1	0
K02052	ABC.SP.A; putative spermidine/putrescine transport system ATP-binding protein	1	0	1	1	1	1	1
K02056	ABC.SS.A; simple sugar transport system ATP-binding protein [EC:7.5.2.-]	1	1	2	0	1	1	1
K02057	ABC.SS.P; simple sugar transport system permease protein	2	2	5	0	2	2	2
K02058	ABC.SS.S; simple sugar transport system substrate-binding protein	0	1	0	0	0	1	1
K02064	thiB, tbpA; thiamine transport system substrate-binding protein	1	0	0	1	1	1	1
K02065	mlaF, linL, mkl; phospholipid/cholesterol/gamma-HCH transport system ATP-binding protein	1	1	1	0	0	0	0
K02066	mlaE, linK; phospholipid/cholesterol/gamma-HCH transport system permease protein	4	2	2	0	0	0	0
K02067	mlaD, linM; phospholipid/cholesterol/gamma-HCH transport system substrate-binding protein	8	3	2	0	0	0	0
K02068	ABC.X2.A; putative ABC transport system ATP-binding protein	1	0	0	0	1	0	1
K02069	ABC.X2.P; putative ABC transport system permease protein	1	1	0	1	1	0	1
K02074	ABC.ZM.A; zinc/manganese transport system ATP-binding protein	0	0	0	0	0	1	0
K02075	ABC.ZM.P; zinc/manganese transport system permease protein	1	1	0	0	1	1	1
K02077	ABC.ZM.S; zinc/manganese transport system substrate-binding protein	2	1	0	1	2	1	1
K02078	acpP; acyl carrier protein	2	3	4	2	2	1	2
K02108	ATPF0A, atpB; F-type H+-transporting ATPase subunit a	1	1	1	1	1	1	1
K02109	ATPF0B, atpF; F-type H+-transporting ATPase subunit b	1	1	1	2	1	2	2
K02110	ATPF0C, atpE; F-type H+-transporting ATPase subunit c	1	1	1	1	0	0	1
K02111	ATPF1A, atpA; F-type H+/Na+-transporting ATPase subunit alpha [EC:7.1.2.2 7.2.2.1]	1	1	1	1	1	1	1
K02112	ATPF1B, atpD; F-type H+/Na+-transporting ATPase subunit beta [EC:7.1.2.2 7.2.2.1]	1	1	2	1	1	1	1
K02113	ATPF1D, atpH; F-type H+-transporting ATPase subunit delta	1	1	1	1	1	0	1
K02114	ATPF1E, atpC; F-type H+-transporting ATPase subunit epsilon	1	1	1	1	1	1	1
K02115	ATPF1G, atpG; F-type H+-transporting ATPase subunit gamma	1	1	1	1	1	1	1
K02160	accB, bccP; acetyl-CoA carboxylase biotin carboxyl carrier protein	0	0	0	0	1	0	0
K02168	betT, betS; choline/glycine/proline betaine transport protein	0	0	0	0	0	0	1
K02169	bioC; malonyl-CoA O-methyltransferase [EC:2.1.1.197]	0	0	1	0	0	0	0
K02173	yggC; putative kinase	0	0	0	0	0	1	0
K02182	caiC; carnitine-CoA ligase [EC:6.2.1.48]	0	1	0	1	0	1	2
K02193	ccmA; heme exporter protein A [EC:7.6.2.5]	1	1	1	1	1	1	1
K02194	ccmB; heme exporter protein B	1	1	1	1	1	1	1
K02195	ccmC; heme exporter protein C	1	1	1	1	1	1	1
K02197	ccmE; cytochrome c-type biogenesis protein CcmE	1	1	1	1	1	1	0
K02198	ccmF; cytochrome c-type biogenesis protein CcmF	1	1	1	1	1	1	1
K02199	ccmG, dsbE; cytochrome c biogenesis protein CcmG, thiol:disulfide interchange protein DsbE	1	1	0	1	2	0	0
K02200	ccmH; cytochrome c-type biogenesis protein CcmH	1	1	1	1	0	1	1
K02203	thrH; phosphoserine / homoserine phosphotransferase [EC:3.1.3.3 2.7.1.39]	1	0	1	0	1	0	0
K02221	yggT; YggT family protein	0	1	0	1	1	1	1
K02224	cobB-cbiA; cobyrinic acid a,c-diamide synthase [EC:6.3.5.9 6.3.5.11]	0	0	1	1	0	0	0
K02226	cobC, phpB; alpha-ribazole phosphatase [EC:3.1.3.73]	0	2	1	0	1	1	2
K02227	cbiB, cobD; adenosylcobinamide-phosphate synthase [EC:6.3.1.10]	1	0	1	1	1	0	0
K02228	cobF; precorrin-6A synthase [EC:2.1.1.152]	0	0	1	1	0	0	0
K02229	cobG; precorrin-3B synthase [EC:1.14.13.83]	0	0	1	0	0	0	0
K02230	cobN; cobaltochelatase CobN [EC:6.6.1.2]	0	0	1	1	0	0	0
K02231	cobP, cobU; adenosylcobinamide kinase / adenosylcobinamide-phosphate guanylyltransferase [EC:2.7.1.156 2.7.7.62]	0	0	1	0	1	0	0
K02232	cobQ, cbiP; adenosylcobyric acid synthase [EC:6.3.5.10]	1	0	1	1	1	0	0
K02233	E2.7.8.26, cobS, cobV; adenosylcobinamide-GDP ribazoletransferase [EC:2.7.8.26]	1	0	1	1	1	0	0
K02237	comEA; competence protein ComEA	1	1	0	1	1	1	1
K02238	comEC; competence protein ComEC	1	1	0	1	0	1	1
K02257	COX10, ctaB, cyoE; heme o synthase [EC:2.5.1.141]	1	1	1	1	1	1	1
K02259	COX15, ctaA; cytochrome c oxidase assembly protein subunit 15	1	1	1	1	1	1	1
K02274	coxA, ctaD; cytochrome c oxidase subunit I [EC:7.1.1.9]	3	2	1	3	1	2	1
K02275	coxB, ctaC; cytochrome c oxidase subunit II [EC:7.1.1.9]	2	3	2	2	4	3	1
K02276	coxC, ctaE; cytochrome c oxidase subunit III [EC:7.1.1.9]	2	2	2	3	1	3	1
K02277	coxD, ctaF; cytochrome c oxidase subunit IV [EC:7.1.1.9]	1	1	1	1	1	1	1
K02279	cpaB, rcpC; pilus assembly protein CpaB	1	0	0	0	0	0	0
K02282	cpaE, tadZ; pilus assembly protein CpaE	3	1	2	1	1	1	1
K02283	cpaF, tadA; pilus assembly protein CpaF [EC:7.4.2.8]	7	5	2	3	3	3	3
K02291	crtB; 15-cis-phytoene synthase [EC:2.5.1.32]	1	0	0	1	0	1	1
K02302	cysG; uroporphyrin-III C-methyltransferase / precorrin-2 dehydrogenase / sirohydrochlorin ferrochelatase [EC:2.1.1.107 1.3.1.76 4.99.1.4]	1	0	0	0	0	0	0
K02303	cobA; uroporphyrin-III C-methyltransferase [EC:2.1.1.107]	0	0	0	0	1	0	0
K02304	MET8; precorrin-2 dehydrogenase / sirohydrochlorin ferrochelatase [EC:1.3.1.76 4.99.1.4]	0	1	1	1	1	0	1
K02313	dnaA; chromosomal replication initiator protein	1	1	1	1	1	1	1
K02314	dnaB; replicative DNA helicase [EC:3.6.4.12]	1	1	1	1	1	1	1
K02315	dnaC; DNA replication protein DnaC	0	0	1	0	0	0	0
K02316	dnaG; DNA primase [EC:2.7.7.101]	1	1	1	1	1	1	1
K02335	polA; DNA polymerase I [EC:2.7.7.7]	1	1	2	1	1	2	1
K02337	dnaE; DNA polymerase III subunit alpha [EC:2.7.7.7]	1	1	2	1	1	1	1
K02338	dnaN; DNA polymerase III subunit beta [EC:2.7.7.7]	1	1	1	1	1	1	1
K02340	holA; DNA polymerase III subunit delta [EC:2.7.7.7]	1	1	1	1	1	1	1
K02341	holB; DNA polymerase III subunit delta' [EC:2.7.7.7]	1	1	1	1	1	1	1
K02342	dnaQ; DNA polymerase III subunit epsilon [EC:2.7.7.7]	0	1	1	1	1	1	2
K02343	dnaX; DNA polymerase III subunit gamma/tau [EC:2.7.7.7]	1	1	1	1	1	1	1
K02346	dinB; DNA polymerase IV [EC:2.7.7.7]	2	2	3	1	3	2	2
K02348	elaA; ElaA protein	1	0	0	0	1	0	0
K02351	K02351; putative membrane protein	1	1	0	2	1	1	0
K02355	fusA, GFM, EFG; elongation factor G	1	2	1	2	2	1	2
K02356	efp; elongation factor P	1	1	1	1	1	1	1
K02357	tsf, TSFM; elongation factor Ts	1	1	1	1	1	1	1
K02358	tuf, TUFM; elongation factor Tu	2	2	2	4	2	2	4
K02361	entC; isochorismate synthase [EC:5.4.4.2]	1	0	0	1	1	1	1
K02371	fabK; enoyl-[acyl-carrier protein] reductase II [EC:1.3.1.9]	1	0	1	0	1	0	1
K02372	fabZ; 3-hydroxyacyl-[acyl-carrier-protein] dehydratase [EC:4.2.1.59]	1	1	1	1	1	0	1
K02377	TSTA3, fcl; GDP-L-fucose synthase [EC:1.1.1.271]	0	0	3	1	0	1	1
K02379	fdhD; FdhD protein	1	1	1	1	1	1	1
K02385	flbD; flagellar protein FlbD	0	0	0	0	1	1	0
K02387	flgB; flagellar basal-body rod protein FlgB	0	0	0	0	1	1	0
K02388	flgC; flagellar basal-body rod protein FlgC	0	0	0	0	1	1	0
K02389	flgD; flagellar basal-body rod modification protein FlgD	0	0	0	0	1	1	0
K02390	flgE; flagellar hook protein FlgE	0	0	0	0	1	1	0
K02396	flgK; flagellar hook-associated protein 1	0	0	1	0	1	1	0
K02397	flgL; flagellar hook-associated protein 3 FlgL	0	0	0	0	1	0	0
K02400	flhA; flagellar biosynthesis protein FlhA	0	0	0	0	1	1	0
K02401	flhB; flagellar biosynthesis protein FlhB	0	0	0	0	1	1	0
K02405	fliA, whiG; RNA polymerase sigma factor FliA	1	2	2	2	3	3	2
K02406	fliC, hag; flagellin	0	0	0	0	1	1	0
K02407	fliD; flagellar hook-associated protein 2	0	0	0	0	1	1	0
K02408	fliE; flagellar hook-basal body complex protein FliE	0	0	0	0	1	1	0
K02409	fliF; flagellar M-ring protein FliF	0	0	0	0	1	1	0
K02410	fliG; flagellar motor switch protein FliG	0	0	0	0	1	1	0
K02411	fliH; flagellar assembly protein FliH	0	0	0	0	1	0	0
K02412	fliI; flagellum-specific ATP synthase [EC:7.4.2.8]	0	0	0	0	1	1	0
K02414	fliK; flagellar hook-length control protein FliK	0	0	0	0	1	0	0
K02415	fliL; flagellar protein FliL	0	0	0	0	1	0	0
K02416	fliM; flagellar motor switch protein FliM	0	0	0	0	1	1	0
K02417	fliN; flagellar motor switch protein FliN	0	0	0	0	1	1	0
K02418	fliO, fliZ; flagellar protein FliO/FliZ	0	0	0	0	1	0	0
K02419	fliP; flagellar biosynthesis protein FliP	0	0	0	0	1	1	0
K02420	fliQ; flagellar biosynthesis protein FliQ	0	0	0	0	1	1	0
K02421	fliR; flagellar biosynthesis protein FliR	0	0	0	0	1	1	0
K02422	fliS; flagellar secretion chaperone FliS	0	0	0	0	1	1	0
K02428	rdgB; XTP/dITP diphosphohydrolase [EC:3.6.1.66]	1	1	1	1	1	1	1
K02433	gatA, QRSL1; aspartyl-tRNA(Asn)/glutamyl-tRNA(Gln) amidotransferase subunit A [EC:6.3.5.6 6.3.5.7]	3	4	5	4	2	4	2
K02434	gatB, PET112; aspartyl-tRNA(Asn)/glutamyl-tRNA(Gln) amidotransferase subunit B [EC:6.3.5.6 6.3.5.7]	1	1	1	1	1	1	1
K02435	gatC, GATC; aspartyl-tRNA(Asn)/glutamyl-tRNA(Gln) amidotransferase subunit C [EC:6.3.5.6 6.3.5.7]	1	1	1	1	1	1	1
K02437	gcvH, GCSH; glycine cleavage system H protein	1	1	1	1	1	1	1
K02440	GLPF; glycerol uptake facilitator protein	0	1	0	0	0	0	0
K02446	glpX; fructose-1,6-bisphosphatase II [EC:3.1.3.11]	1	1	1	1	1	1	1
K02469	gyrA; DNA gyrase subunit A [EC:5.6.2.2]	1	1	1	1	2	2	1
K02470	gyrB; DNA gyrase subunit B [EC:5.6.2.2]	1	1	1	1	2	2	1
K02472	wecC; UDP-N-acetyl-D-mannosaminuronic acid dehydrogenase [EC:1.1.1.336]	2	1	1	1	0	1	1
K02479	K02479; two-component system, NarL family, response regulator	1	1	0	0	0	0	0
K02480	K02480; two-component system, NarL family, sensor kinase [EC:2.7.13.3]	0	0	0	0	2	0	0
K02483	K02483; two-component system, OmpR family, response regulator	7	6	5	2	1	4	1
K02484	K02484; two-component system, OmpR family, sensor kinase [EC:2.7.13.3]	2	2	1	0	0	1	0
K02485	rssB, hnr; two-component system, response regulator	0	0	1	0	1	1	0
K02487	#N/A	0	0	0	0	1	0	0
K02492	hemA; glutamyl-tRNA reductase [EC:1.2.1.70]	1	1	1	1	1	1	1
K02493	hemK, prmC, HEMK; release factor glutamine methyltransferase [EC:2.1.1.297]	1	2	1	1	1	1	1
K02499	yabN; tetrapyrrole methylase family protein / MazG family protein	1	1	1	1	1	1	1
K02500	hisF; imidazole glycerol-phosphate synthase subunit HisF [EC:4.3.2.10]	1	1	1	1	1	1	1
K02501	hisH; imidazole glycerol-phosphate synthase subunit HisH [EC:4.3.2.10]	1	1	2	1	1	1	1
K02503	HINT1, hinT, hit; histidine triad (HIT) family protein	2	3	1	2	2	2	1
K02518	infA; translation initiation factor IF-1	1	1	1	1	1	1	1
K02519	infB, MTIF2; translation initiation factor IF-2	1	1	1	1	1	1	1
K02520	infC, MTIF3; translation initiation factor IF-3	1	1	0	1	1	1	1
K02528	ksgA; 16S rRNA (adenine1518-N6/adenine1519-N6)-dimethyltransferase [EC:2.1.1.182]	1	1	1	1	1	1	1
K02529	lacI, galR; LacI family transcriptional regulator	1	0	0	0	0	0	0
K02548	menA; 1,4-dihydroxy-2-naphthoate polyprenyltransferase [EC:2.5.1.74]	1	1	1	1	1	1	1
K02549	menC; o-succinylbenzoate synthase [EC:4.2.1.113]	1	1	1	1	1	0	1
K02551	menD; 2-succinyl-5-enolpyruvyl-6-hydroxy-3-cyclohexene-1-carboxylate synthase [EC:2.2.1.9]	1	1	1	1	1	1	1
K02552	menF; menaquinone-specific isochorismate synthase [EC:5.4.4.2]	0	1	1	0	0	0	0
K02554	mhpD; 2-keto-4-pentenoate hydratase [EC:4.2.1.80]	0	0	0	0	0	1	0
K02556	motA; chemotaxis protein MotA	0	0	0	0	1	1	0
K02557	motB; chemotaxis protein MotB	0	0	0	0	1	1	0
K02563	murG; UDP-N-acetylglucosamine--N-acetylmuramyl-(pentapeptide) pyrophosphoryl-undecaprenol N-acetylglucosamine transferase [EC:2.4.1.227]	2	1	1	1	1	1	1
K02566	nagD; NagD protein	0	0	1	0	1	1	1
K02575	NRT, narK, nrtP, nasA; MFS transporter, NNP family, nitrate/nitrite transporter	0	0	1	1	1	1	0
K02600	nusA; transcription termination/antitermination protein NusA	1	1	1	1	1	1	1
K02601	nusG; transcription termination/antitermination protein NusG	1	1	1	1	1	1	1
K02614	paaI; acyl-CoA thioesterase [EC:3.1.2.-]	0	0	0	1	0	0	0
K02616	paaX; phenylacetic acid degradation operon negative regulatory protein	1	1	1	1	1	2	1
K02617	paaY; phenylacetic acid degradation protein	0	0	1	1	1	0	1
K02626	pdaD; arginine decarboxylase [EC:4.1.1.19]	0	0	0	0	1	0	0
K02636	petC; cytochrome b6-f complex iron-sulfur subunit [EC:7.1.1.6]	0	0	0	0	0	0	1
K02650	pilA; type IV pilus assembly protein PilA	0	1	0	0	0	0	0
K02652	pilB; type IV pilus assembly protein PilB	0	1	1	0	0	1	0
K02653	pilC; type IV pilus assembly protein PilC	0	1	1	0	0	1	0
K02654	pilD, pppA; leader peptidase (prepilin peptidase) / N-methyltransferase [EC:3.4.23.43 2.1.1.-]	0	1	1	1	1	1	1
K02669	pilT; twitching motility protein PilT	1	2	4	0	0	1	0
K02687	prmA; ribosomal protein L11 methyltransferase [EC:2.1.1.-]	1	2	1	1	1	1	1
K02805	wecE, rffA; dTDP-4-amino-4,6-dideoxygalactose transaminase [EC:2.6.1.59]	0	1	0	0	0	0	0
K02823	pyrDII; dihydroorotate dehydrogenase electron transfer subunit	0	0	0	1	0	0	0
K02825	pyrR; pyrimidine operon attenuation protein / uracil phosphoribosyltransferase [EC:2.4.2.9]	1	1	1	1	1	1	1
K02834	rbfA; ribosome-binding factor A	1	1	1	1	1	1	1
K02835	prfA, MTRF1, MRF1; peptide chain release factor 1	1	2	2	1	1	1	2
K02836	prfB; peptide chain release factor 2	1	1	1	1	1	1	1
K02837	prfC; peptide chain release factor 3	1	1	2	1	1	1	1
K02838	frr, MRRF, RRF; ribosome recycling factor	1	1	1	1	1	1	1
K02851	wecA, tagO, rfe; UDP-GlcNAc:undecaprenyl-phosphate/decaprenyl-phosphate GlcNAc-1-phosphate transferase [EC:2.7.8.33 2.7.8.35]	1	1	1	2	1	1	1
K02860	rimM; 16S rRNA processing protein RimM	1	1	1	1	1	1	1
K02862	ctaG; putative membrane protein	1	1	0	0	0	0	0
K02863	RP-L1, MRPL1, rplA; large subunit ribosomal protein L1	1	1	1	1	1	1	1
K02864	RP-L10, MRPL10, rplJ; large subunit ribosomal protein L10	1	1	1	1	1	1	1
K02867	RP-L11, MRPL11, rplK; large subunit ribosomal protein L11	1	1	1	1	1	1	1
K02871	RP-L13, MRPL13, rplM; large subunit ribosomal protein L13	1	1	1	1	1	1	1
K02874	RP-L14, MRPL14, rplN; large subunit ribosomal protein L14	1	1	1	1	1	1	1
K02876	RP-L15, MRPL15, rplO; large subunit ribosomal protein L15	1	1	1	1	1	1	1
K02878	RP-L16, MRPL16, rplP; large subunit ribosomal protein L16	1	1	1	1	1	1	1
K02879	RP-L17, MRPL17, rplQ; large subunit ribosomal protein L17	1	1	1	1	1	1	1
K02881	RP-L18, MRPL18, rplR; large subunit ribosomal protein L18	1	1	1	1	1	1	1
K02884	RP-L19, MRPL19, rplS; large subunit ribosomal protein L19	1	1	1	1	1	1	1
K02886	RP-L2, MRPL2, rplB; large subunit ribosomal protein L2	1	1	1	1	1	1	1
K02887	RP-L20, MRPL20, rplT; large subunit ribosomal protein L20	1	1	1	1	1	1	1
K02888	RP-L21, MRPL21, rplU; large subunit ribosomal protein L21	1	1	1	1	1	1	1
K02890	RP-L22, MRPL22, rplV; large subunit ribosomal protein L22	1	1	0	1	1	1	1
K02892	RP-L23, MRPL23, rplW; large subunit ribosomal protein L23	1	1	1	1	1	1	1
K02895	RP-L24, MRPL24, rplX; large subunit ribosomal protein L24	1	1	1	1	1	1	1
K02897	RP-L25, rplY; large subunit ribosomal protein L25	1	1	1	1	1	1	1
K02899	RP-L27, MRPL27, rpmA; large subunit ribosomal protein L27	1	1	1	1	1	1	1
K02902	RP-L28, MRPL28, rpmB; large subunit ribosomal protein L28	1	1	1	1	1	1	1
K02904	RP-L29, rpmC; large subunit ribosomal protein L29	1	1	0	1	1	1	1
K02906	RP-L3, MRPL3, rplC; large subunit ribosomal protein L3	1	1	1	1	1	1	1
K02907	RP-L30, MRPL30, rpmD; large subunit ribosomal protein L30	1	1	1	1	1	1	1
K02909	RP-L31, rpmE; large subunit ribosomal protein L31	1	1	1	1	1	1	1
K02911	RP-L32, MRPL32, rpmF; large subunit ribosomal protein L32	1	1	1	1	1	1	1
K02913	RP-L33, MRPL33, rpmG; large subunit ribosomal protein L33	1	1	1	1	1	1	1
K02914	RP-L34, MRPL34, rpmH; large subunit ribosomal protein L34	1	1	1	0	1	0	0
K02916	RP-L35, MRPL35, rpmI; large subunit ribosomal protein L35	1	1	1	1	1	1	1
K02919	RP-L36, MRPL36, rpmJ; large subunit ribosomal protein L36	1	1	1	1	1	1	0
K02926	RP-L4, MRPL4, rplD; large subunit ribosomal protein L4	1	1	1	1	1	1	1
K02931	RP-L5, MRPL5, rplE; large subunit ribosomal protein L5	1	1	1	1	1	1	1
K02933	RP-L6, MRPL6, rplF; large subunit ribosomal protein L6	1	1	1	1	1	1	1
K02935	RP-L7, MRPL12, rplL; large subunit ribosomal protein L7/L12	1	1	1	1	1	1	1
K02939	RP-L9, MRPL9, rplI; large subunit ribosomal protein L9	1	1	1	1	1	1	1
K02945	RP-S1, rpsA; small subunit ribosomal protein S1	2	2	1	1	1	2	1
K02946	RP-S10, MRPS10, rpsJ; small subunit ribosomal protein S10	1	1	1	1	1	1	1
K02948	RP-S11, MRPS11, rpsK; small subunit ribosomal protein S11	1	1	1	1	1	1	1
K02950	RP-S12, MRPS12, rpsL; small subunit ribosomal protein S12	1	1	1	1	1	1	1
K02952	RP-S13, rpsM; small subunit ribosomal protein S13	1	1	1	1	1	1	1
K02954	RP-S14, MRPS14, rpsN; small subunit ribosomal protein S14	1	1	1	1	1	1	1
K02956	RP-S15, MRPS15, rpsO; small subunit ribosomal protein S15	1	1	1	1	1	1	1
K02959	RP-S16, MRPS16, rpsP; small subunit ribosomal protein S16	1	1	1	1	1	1	1
K02961	RP-S17, MRPS17, rpsQ; small subunit ribosomal protein S17	1	1	1	1	1	1	1
K02963	RP-S18, MRPS18, rpsR; small subunit ribosomal protein S18	1	1	1	1	1	1	1
K02965	RP-S19, rpsS; small subunit ribosomal protein S19	1	1	1	1	1	1	1
K02967	RP-S2, MRPS2, rpsB; small subunit ribosomal protein S2	1	1	1	1	1	1	2
K02968	RP-S20, rpsT; small subunit ribosomal protein S20	1	1	1	1	1	1	1
K02982	RP-S3, rpsC; small subunit ribosomal protein S3	1	1	1	1	1	1	1
K02986	RP-S4, rpsD; small subunit ribosomal protein S4	1	1	1	1	1	1	1
K02988	RP-S5, MRPS5, rpsE; small subunit ribosomal protein S5	1	1	1	1	1	1	1
K02990	RP-S6, MRPS6, rpsF; small subunit ribosomal protein S6	1	1	0	1	1	1	1
K02992	RP-S7, MRPS7, rpsG; small subunit ribosomal protein S7	1	1	1	1	1	1	1
K02994	RP-S8, rpsH; small subunit ribosomal protein S8	1	1	1	1	1	1	1
K02996	RP-S9, MRPS9, rpsI; small subunit ribosomal protein S9	1	1	1	1	1	1	1
K03040	rpoA; DNA-directed RNA polymerase subunit alpha [EC:2.7.7.6]	1	1	1	1	1	1	1
K03043	rpoB; DNA-directed RNA polymerase subunit beta [EC:2.7.7.6]	1	1	2	1	1	1	1
K03046	rpoC; DNA-directed RNA polymerase subunit beta' [EC:2.7.7.6]	1	1	2	1	1	1	1
K03060	rpoZ; DNA-directed RNA polymerase subunit omega [EC:2.7.7.6]	1	1	1	1	1	1	1
K03070	secA; preprotein translocase subunit SecA [EC:7.4.2.8]	1	1	1	1	1	1	1
K03072	secD; preprotein translocase subunit SecD	2	2	1	1	2	2	1
K03073	secE; preprotein translocase subunit SecE	1	1	1	1	1	1	1
K03074	secF; preprotein translocase subunit SecF	0	0	0	1	0	0	1
K03075	secG; preprotein translocase subunit SecG	1	1	1	1	1	1	1
K03076	secY; preprotein translocase subunit SecY	1	1	1	1	1	1	1
K03086	rpoD; RNA polymerase primary sigma factor	5	3	4	3	3	5	4
K03088	rpoE; RNA polymerase sigma-70 factor, ECF subfamily	19	15	14	9	16	19	10
K03090	sigB; RNA polymerase sigma-B factor	1	2	4	1	2	3	1
K03091	sigH; RNA polymerase sporulation-specific sigma factor	1	0	0	0	0	0	0
K03098	APOD; apolipoprotein D and lipocalin family protein	0	0	0	0	0	1	0
K03100	lepB; signal peptidase I [EC:3.4.21.89]	2	1	2	1	1	1	1
K03101	lspA; signal peptidase II [EC:3.4.23.36]	1	2	1	1	3	1	1
K03106	SRP54, ffh; signal recognition particle subunit SRP54 [EC:3.6.5.4]	1	1	1	1	1	1	1
K03110	ftsY; fused signal recognition particle receptor	1	1	1	1	1	1	1
K03111	ssb; single-strand DNA-binding protein	2	2	2	1	2	1	2
K03116	tatA; sec-independent protein translocase protein TatA	1	1	0	1	1	0	0
K03117	tatB; sec-independent protein translocase protein TatB	1	0	0	0	0	0	1
K03118	tatC; sec-independent protein translocase protein TatC	1	1	1	1	1	1	1
K03119	tauD; taurine dioxygenase [EC:1.14.11.17]	1	2	1	0	0	2	5
K03147	thiC; phosphomethylpyrimidine synthase [EC:4.1.99.17]	0	0	0	1	0	0	0
K03149	thiG; thiazole synthase [EC:2.8.1.10]	0	0	0	1	0	0	0
K03153	thiO; glycine oxidase [EC:1.4.3.19]	0	0	0	1	0	0	0
K03154	thiS; sulfur carrier protein	1	1	1	2	1	1	1
K03168	topA; DNA topoisomerase I [EC:5.6.2.1]	1	2	2	1	2	2	1
K03169	topB; DNA topoisomerase III [EC:5.6.2.1]	0	0	0	0	0	0	1
K03177	truB, PUS4, TRUB1; tRNA pseudouridine55 synthase [EC:5.4.99.25]	1	1	1	1	1	1	1
K03183	ubiE; demethylmenaquinone methyltransferase / 2-methoxy-6-polyprenyl-1,4-benzoquinol methylase [EC:2.1.1.163 2.1.1.201]	1	2	1	1	1	1	1
K03188	ureF; urease accessory protein	1	0	0	0	0	1	0
K03189	ureG; urease accessory protein	1	0	0	0	0	1	0
K03190	ureD, ureH; urease accessory protein	1	0	0	0	0	1	0
K03192	ureJ; urease accessory protein	0	0	1	1	0	0	0
K03205	virD4, lvhD4; type IV secretion system protein VirD4 [EC:7.4.2.8]	0	2	0	0	0	0	0
K03208	wcaI; colanic acid biosynthesis glycosyl transferase WcaI	0	0	1	1	0	1	1
K03210	yajC; preprotein translocase subunit YajC	0	0	1	1	1	1	1
K03215	rumA; 23S rRNA (uracil1939-C5)-methyltransferase [EC:2.1.1.190]	1	1	1	1	1	1	1
K03217	yidC, spoIIIJ, OXA1, ccfA; YidC/Oxa1 family membrane protein insertase	1	1	1	1	1	1	1
K03218	rlmB; 23S rRNA (guanosine2251-2'-O)-methyltransferase [EC:2.1.1.185]	1	1	1	1	1	1	1
K03271	gmhA, lpcA; D-sedoheptulose 7-phosphate isomerase [EC:5.3.1.28]	0	0	0	0	0	1	0
K03272	gmhC, hldE, waaE, rfaE; D-beta-D-heptose 7-phosphate kinase / D-beta-D-heptose 1-phosphate adenosyltransferase [EC:2.7.1.167 2.7.7.70]	0	0	0	0	0	1	0
K03273	gmhB; D-glycero-D-manno-heptose 1,7-bisphosphate phosphatase [EC:3.1.3.82 3.1.3.83]	0	0	0	0	0	0	1
K03281	TC.CIC; chloride channel protein, CIC family	2	1	1	0	1	1	1
K03282	mscL; large conductance mechanosensitive channel	1	1	1	1	1	1	1
K03284	corA; magnesium transporter	1	2	1	1	1	2	1
K03286	TC.OOP; OmpA-OmpF porin, OOP family	0	0	1	0	0	0	0
K03294	TC.APA; basic amino acid/polyamine antiporter, APA family	1	0	1	0	1	1	0
K03297	emrE, qac, mmr, smr; small multidrug resistance pump	0	1	0	0	0	0	0
K03298	TC.DME; drug/metabolite transporter, DME family	1	0	0	0	0	0	0
K03308	TC.NSS; neurotransmitter:Na+ symporter, NSS family	0	0	0	0	0	0	1
K03313	nhaA; Na+:H+ antiporter, NhaA family	2	0	1	1	3	0	0
K03315	nhaC; Na+:H+ antiporter, NhaC family	0	0	1	0	0	0	0
K03316	TC.CPA1; monovalent cation:H+ antiporter, CPA1 family	0	1	1	0	1	0	0
K03320	amt, AMT, MEP; ammonium transporter, Amt family	2	3	1	2	2	3	1
K03321	TC.SULP; sulfate permease, SulP family	1	1	1	1	2	1	3
K03324	yjbB; phosphate:Na+ symporter	1	0	0	0	1	0	0
K03325	ACR3, arsB; arsenite transporter	0	1	0	0	0	0	1
K03333	choD; cholesterol oxidase [EC:1.1.3.6]	0	0	3	0	0	0	0
K03342	pabBC; para-aminobenzoate synthetase / 4-amino-4-deoxychorismate lyase [EC:2.6.1.85 4.1.3.38]	0	0	0	0	1	0	0
K03366	butA, budC; meso-butanediol dehydrogenase / (S,S)-butanediol dehydrogenase / diacetyl reductase [EC:1.1.1.- 1.1.1.76 1.1.1.304]	0	0	0	0	0	1	0
K03379	chnB; cyclohexanone monooxygenase [EC:1.14.13.22]	4	4	2	0	3	1	3
K03386	PRDX2_4, ahpC; peroxiredoxin 2/4 [EC:1.11.1.24]	1	1	3	1	2	2	2
K03387	ahpF; NADH-dependent peroxiredoxin subunit F [EC:1.8.1.-]	0	0	2	0	1	1	1
K03392	ACMSD; aminocarboxymuconate-semialdehyde decarboxylase [EC:4.1.1.45]	1	0	0	0	0	0	0
K03394	cobI-cbiL; precorrin-2/cobalt-factor-2 C20-methyltransferase [EC:2.1.1.130 2.1.1.151]	0	0	2	2	0	0	0
K03402	argR, ahrC; transcriptional regulator of arginine metabolism	1	1	1	1	1	1	1
K03404	chlD, bchD; magnesium chelatase subunit D [EC:6.6.1.1]	0	0	1	1	0	0	0
K03405	chlI, bchI; magnesium chelatase subunit I [EC:6.6.1.1]	1	1	1	1	1	1	1
K03406	mcp; methyl-accepting chemotaxis protein	0	0	0	0	4	1	0
K03407	cheA; two-component system, chemotaxis family, sensor kinase CheA [EC:2.7.13.3]	0	0	0	1	0	0	0
K03408	cheW; purine-binding chemotaxis protein CheW	0	0	0	0	1	0	0
K03409	cheX; chemotaxis protein CheX	0	0	0	0	1	0	0
K03412	cheB; two-component system, chemotaxis family, protein-glutamate methylesterase/glutaminase [EC:3.1.1.61 3.5.1.44]	0	0	0	0	1	0	0
K03413	cheY; two-component system, chemotaxis family, chemotaxis protein CheY	0	0	0	0	2	0	0
K03424	tatD; TatD DNase family protein [EC:3.1.21.-]	1	1	1	1	1	1	1
K03426	E3.6.1.22, NUDT12, nudC; NAD+ diphosphatase [EC:3.6.1.22]	1	0	0	0	0	0	0
K03427	hsdM; type I restriction enzyme M protein [EC:2.1.1.72]	0	0	0	0	0	0	1
K03431	glmM; phosphoglucosamine mutase [EC:5.4.2.10]	1	1	1	1	1	1	1
K03432	psmA, prcA; proteasome alpha subunit [EC:3.4.25.1]	1	1	1	1	1	1	1
K03433	psmB, prcB; proteasome beta subunit [EC:3.4.25.1]	1	1	1	1	1	1	1
K03437	spoU; RNA methyltransferase, TrmH family	1	1	1	1	1	1	1
K03438	mraW, rsmH; 16S rRNA (cytosine1402-N4)-methyltransferase [EC:2.1.1.199]	1	1	1	1	1	1	1
K03439	trmB, METTL1, TRM8; tRNA (guanine-N7-)-methyltransferase [EC:2.1.1.33]	1	1	0	0	0	0	0
K03446	emrB; MFS transporter, DHA2 family, multidrug resistance protein	0	1	0	0	0	0	1
K03453	TC.BASS; bile acid:Na+ symporter, BASS family	0	1	0	0	0	0	0
K03455	TC.KEF; monovalent cation:H+ antiporter-2, CPA2 family	1	1	0	1	1	0	2
K03466	ftsK, spoIIIE; DNA segregation ATPase FtsK/SpoIIIE, S-DNA-T family	2	2	1	2	1	2	1
K03469	rnhA, RNASEH1; ribonuclease HI [EC:3.1.26.4]	1	1	1	1	1	1	1
K03470	rnhB; ribonuclease HII [EC:3.1.26.4]	1	1	1	1	1	1	1
K03478	chbG; chitin disaccharide deacetylase [EC:3.5.1.105]	1	1	2	1	2	1	1
K03496	parA, soj; chromosome partitioning protein	2	2	2	3	2	3	2
K03497	parB, spo0J; ParB family transcriptional regulator, chromosome partitioning protein	1	1	1	1	2	1	1
K03498	trkH, trkG, ktrB; trk system potassium uptake protein	2	2	0	1	2	0	2
K03499	trkA, ktrA; trk system potassium uptake protein	1	4	2	3	1	0	2
K03500	rsmB, sun; 16S rRNA (cytosine967-C5)-methyltransferase [EC:2.1.1.176]	1	1	1	1	1	1	1
K03501	gidB, rsmG; 16S rRNA (guanine527-N7)-methyltransferase [EC:2.1.1.170]	1	1	0	1	1	1	1
K03517	nadA; quinolinate synthase [EC:2.5.1.72]	1	1	1	1	1	1	1
K03518	coxS; aerobic carbon-monoxide dehydrogenase small subunit [EC:1.2.5.3]	2	2	0	1	2	2	2
K03519	coxM, cutM; aerobic carbon-monoxide dehydrogenase medium subunit [EC:1.2.5.3]	2	1	0	1	2	1	2
K03520	coxL, cutL; aerobic carbon-monoxide dehydrogenase large subunit [EC:1.2.5.3]	3	1	0	1	3	0	4
K03521	fixA, etfB; electron transfer flavoprotein beta subunit	1	1	1	1	1	2	2
K03522	fixB, etfA; electron transfer flavoprotein alpha subunit	1	1	1	1	1	2	2
K03523	bioY; biotin transport system substrate-specific component	0	0	0	0	1	0	0
K03524	birA; BirA family transcriptional regulator, biotin operon repressor / biotin---[acetyl-CoA-carboxylase] ligase [EC:6.3.4.15]	2	1	1	1	1	1	1
K03525	coaX; type III pantothenate kinase [EC:2.7.1.33]	1	1	1	1	1	2	1
K03526	gcpE, ispG; (E)-4-hydroxy-3-methylbut-2-enyl-diphosphate synthase [EC:1.17.7.1 1.17.7.3]	1	1	1	1	1	1	1
K03527	ispH, lytB; 4-hydroxy-3-methylbut-2-en-1-yl diphosphate reductase [EC:1.17.7.4]	1	1	1	1	1	1	1
K03529	smc; chromosome segregation protein	1	1	2	1	1	1	1
K03530	hupB; DNA-binding protein HU-beta	1	1	0	2	2	1	2
K03531	ftsZ; cell division protein FtsZ	1	1	1	1	1	1	1
K03544	clpX, CLPX; ATP-dependent Clp protease ATP-binding subunit ClpX	1	1	2	1	1	1	1
K03545	tig; trigger factor	1	1	1	1	1	1	1
K03546	sbcC, rad50; DNA repair protein SbcC/Rad50	1	2	1	1	0	1	1
K03547	sbcD, mre11; DNA repair protein SbcD/Mre11	1	2	1	1	0	1	1
K03549	kup; KUP system potassium uptake protein	1	0	0	0	0	1	0
K03550	ruvA; holliday junction DNA helicase RuvA [EC:3.6.4.12]	1	1	1	1	1	1	1
K03551	ruvB; holliday junction DNA helicase RuvB [EC:3.6.4.12]	2	1	1	2	2	2	2
K03553	recA; recombination protein RecA	1	1	1	1	2	1	1
K03556	malT; LuxR family transcriptional regulator, maltose regulon positive regulatory protein	2	1	1	0	0	0	1
K03563	csrA; carbon storage regulator	0	0	0	0	1	1	0
K03564	BCP, PRXQ, DOT5; thioredoxin-dependent peroxiredoxin [EC:1.11.1.24]	3	2	2	3	2	3	3
K03567	gcvR; glycine cleavage system transcriptional repressor	0	0	0	0	1	0	0
K03568	tldD; TldD protein	1	1	1	1	1	1	1
K03569	mreB; rod shape-determining protein MreB and related proteins	2	2	3	2	2	2	2
K03570	mreC; rod shape-determining protein MreC	1	1	0	1	1	1	1
K03571	mreD; rod shape-determining protein MreD	1	1	1	1	1	1	0
K03574	mutT, NUDT15, MTH2; 8-oxo-dGTP diphosphatase [EC:3.6.1.55]	4	3	2	2	4	2	3
K03575	mutY; A/G-specific adenine glycosylase [EC:3.2.2.31]	1	1	1	1	1	1	1
K03577	acrR, smeT; TetR/AcrR family transcriptional regulator, acrAB operon repressor	0	0	0	1	0	0	1
K03578	hrpA; ATP-dependent helicase HrpA [EC:3.6.4.13]	1	1	0	0	1	0	1
K03579	hrpB; ATP-dependent helicase HrpB [EC:3.6.4.13]	1	1	1	0	0	1	0
K03581	recD; exodeoxyribonuclease V alpha subunit [EC:3.1.11.5]	0	0	0	1	0	1	1
K03582	recB; exodeoxyribonuclease V beta subunit [EC:3.1.11.5]	1	0	0	1	0	1	0
K03583	recC; exodeoxyribonuclease V gamma subunit [EC:3.1.11.5]	1	0	0	1	0	0	0
K03584	recO; DNA repair protein RecO (recombination protein O)	1	1	1	1	1	1	1
K03587	ftsI; cell division protein FtsI (penicillin-binding protein 3) [EC:3.4.16.4]	1	1	0	1	1	1	1
K03588	ftsW, spoVE; cell division protein FtsW	0	2	2	1	2	2	1
K03589	ftsQ; cell division protein FtsQ	1	1	1	1	1	1	1
K03592	pmbA; PmbA protein	1	1	1	2	0	1	1
K03593	mrp, NUBPL; ATP-binding protein involved in chromosome partitioning	2	2	2	2	2	1	2
K03594	bfr; bacterioferritin [EC:1.16.3.1]	0	1	1	0	1	1	1
K03595	era, ERAL1; GTPase	1	1	1	1	1	1	1
K03596	lepA; GTP-binding protein LepA	1	1	1	1	1	1	1
K03601	xseA; exodeoxyribonuclease VII large subunit [EC:3.1.11.6]	1	0	1	1	1	1	1
K03602	xseB; exodeoxyribonuclease VII small subunit [EC:3.1.11.6]	1	1	0	1	1	1	1
K03605	hyaD, hybD; hydrogenase maturation protease [EC:3.4.23.-]	0	0	0	1	0	0	0
K03611	dsbB; protein dithiol:quinone oxidoreductase [EC:1.8.5.9]	1	1	1	1	1	1	1
K03616	rnfB; Na+-translocating ferredoxin:NAD+ oxidoreductase subunit B [EC:7.2.1.2]	1	0	0	1	0	0	0
K03619	hyaE; hydrogenase-1 operon protein HyaE	0	0	0	0	0	1	0
K03621	plsX; phosphate acyltransferase [EC:2.3.1.274]	1	1	1	1	1	0	1
K03624	greA; transcription elongation factor GreA	1	1	1	1	1	1	1
K03625	nusB; transcription antitermination protein NusB	1	1	1	1	1	1	1
K03628	rho; transcription termination factor Rho	1	1	1	1	1	1	1
K03629	recF; DNA replication and repair protein RecF	1	1	1	1	1	1	1
K03630	radC; DNA repair protein RadC	0	0	1	0	0	0	0
K03631	recN; DNA repair protein RecN (Recombination protein N)	1	1	2	1	1	1	1
K03635	MOCS2B, moaE; molybdopterin synthase catalytic subunit [EC:2.8.1.12]	1	1	1	1	1	2	1
K03636	moaD, cysO; sulfur-carrier protein	2	1	2	2	2	2	2
K03637	moaC, CNX3; cyclic pyranopterin monophosphate synthase [EC:4.6.1.17]	1	2	1	1	1	1	2
K03639	moaA, CNX2; GTP 3',8-cyclase [EC:4.1.99.22]	1	1	1	1	1	1	1
K03644	lipA, LIAS, LIP1, LIP5; lipoyl synthase [EC:2.8.1.8]	1	1	1	1	1	1	1
K03648	UNG, UDG; uracil-DNA glycosylase [EC:3.2.2.27]	1	1	1	0	1	0	0
K03649	mug; double-stranded uracil-DNA glycosylase [EC:3.2.2.28]	1	1	1	1	0	1	1
K03651	cpdA; 3',5'-cyclic-AMP phosphodiesterase [EC:3.1.4.53]	1	1	1	1	1	1	1
K03652	MPG; DNA-3-methyladenine glycosylase [EC:3.2.2.21]	1	1	1	1	1	1	1
K03654	recQ; ATP-dependent DNA helicase RecQ [EC:3.6.4.12]	2	2	2	1	2	3	2
K03655	recG; ATP-dependent DNA helicase RecG [EC:3.6.4.12]	1	1	1	1	1	1	1
K03657	uvrD, pcrA; DNA helicase II / ATP-dependent DNA helicase PcrA [EC:3.6.4.12]	4	3	2	2	4	2	2
K03664	smpB; SsrA-binding protein	1	1	1	1	1	1	1
K03665	hflX; GTPase	1	1	1	1	1	1	1
K03668	hslJ; heat shock protein HslJ	0	0	1	1	0	1	0
K03671	trxA; thioredoxin 1	1	2	1	1	1	2	1
K03672	trxC; thioredoxin 2 [EC:1.8.1.8]	1	1	0	0	0	1	1
K03684	rnd; ribonuclease D [EC:3.1.13.5]	1	1	1	1	1	1	1
K03685	rnc, DROSHA, RNT1; ribonuclease III [EC:3.1.26.3]	1	1	1	1	1	1	1
K03686	dnaJ; molecular chaperone DnaJ	2	3	2	3	2	2	2
K03687	GRPE; molecular chaperone GrpE	1	1	1	1	1	2	1
K03688	ubiB, aarF; ubiquinone biosynthesis protein	0	0	0	1	1	2	1
K03695	clpB; ATP-dependent Clp protease ATP-binding subunit ClpB	1	1	1	1	1	2	1
K03696	clpC; ATP-dependent Clp protease ATP-binding subunit ClpC	1	1	1	1	1	1	1
K03699	tlyC; putative hemolysin	1	1	1	0	3	1	1
K03701	uvrA; excinuclease ABC subunit A	1	1	3	1	1	1	1
K03702	uvrB; excinuclease ABC subunit B	1	1	1	1	1	1	1
K03703	uvrC; excinuclease ABC subunit C	1	1	1	1	1	1	1
K03704	cspA; cold shock protein	3	2	3	2	2	3	3
K03705	hrcA; heat-inducible transcriptional repressor	1	1	1	1	1	1	1
K03709	troR; DtxR family transcriptional regulator, Mn-dependent transcriptional regulator	2	1	1	1	2	1	1
K03710	K03710; GntR family transcriptional regulator	1	3	1	1	2	1	2
K03711	fur, zur, furB; Fur family transcriptional regulator, ferric uptake regulator	2	3	1	1	1	1	1
K03718	asnC; Lrp/AsnC family transcriptional regulator, regulator for asnA, asnC and gidA	3	0	1	0	0	1	0
K03719	lrp; Lrp/AsnC family transcriptional regulator, leucine-responsive regulatory protein	1	1	1	0	0	1	0
K03722	dinG; ATP-dependent DNA helicase DinG [EC:3.6.4.12]	1	1	1	2	1	1	1
K03723	mfd; transcription-repair coupling factor (superfamily II helicase) [EC:3.6.4.-]	1	1	1	1	1	1	1
K03724	lhr; ATP-dependent helicase Lhr and Lhr-like helicase [EC:3.6.4.-]	1	1	1	1	2	1	1
K03727	helY; ATP-dependent RNA helicase HelY [EC:3.6.4.-]	1	1	2	1	1	1	1
K03733	xerC; integrase/recombinase XerC	1	1	1	1	1	1	1
K03734	apbE; FAD:protein FMN transferase [EC:2.7.1.180]	1	0	0	1	0	2	0
K03735	eutB; ethanolamine ammonia-lyase large subunit [EC:4.3.1.7]	0	0	0	0	0	0	1
K03736	eutC; ethanolamine ammonia-lyase small subunit [EC:4.3.1.7]	0	0	0	0	0	0	1
K03737	por, nifJ; pyruvate-ferredoxin/flavodoxin oxidoreductase [EC:1.2.7.1 1.2.7.-]	0	0	0	1	1	0	1
K03739	dltB; membrane protein involved in D-alanine export	0	1	0	0	1	1	0
K03741	arsC; arsenate reductase (thioredoxin) [EC:1.20.4.4]	2	1	4	2	3	3	1
K03742	pncC; nicotinamide-nucleotide amidase [EC:3.5.1.42]	1	1	1	1	1	1	1
K03743	pncC; nicotinamide-nucleotide amidase [EC:3.5.1.42]	0	0	0	0	1	1	0
K03744	lemA; LemA protein	0	1	2	2	1	1	0
K03750	moeA; molybdopterin molybdotransferase [EC:2.10.1.1]	1	1	1	1	1	1	1
K03752	mobA; molybdenum cofactor guanylyltransferase [EC:2.7.7.77]	1	0	1	1	1	1	0
K03767	PPIA; peptidyl-prolyl cis-trans isomerase A (cyclophilin A) [EC:5.2.1.8]	0	0	1	0	0	0	0
K03768	PPIB, ppiB; peptidyl-prolyl cis-trans isomerase B (cyclophilin B) [EC:5.2.1.8]	1	1	0	0	1	0	1
K03769	ppiC; peptidyl-prolyl cis-trans isomerase C [EC:5.2.1.8]	0	0	0	0	1	0	0
K03770	ppiD; peptidyl-prolyl cis-trans isomerase D [EC:5.2.1.8]	0	0	0	0	0	0	1
K03778	ldhA; D-lactate dehydrogenase [EC:1.1.1.28]	0	0	0	0	0	1	0
K03781	katE, CAT, catB, srpA; catalase [EC:1.11.1.6]	0	1	1	0	1	1	0
K03782	katG; catalase-peroxidase [EC:1.11.1.21]	1	1	1	1	1	1	1
K03783	punA, PNP; purine-nucleoside phosphorylase [EC:2.4.2.1]	1	0	1	0	1	1	0
K03784	deoD; purine-nucleoside phosphorylase [EC:2.4.2.1]	0	1	0	0	0	0	0
K03786	aroQ, qutE; 3-dehydroquinate dehydratase II [EC:4.2.1.10]	1	1	1	1	1	1	1
K03787	surE; 5'-nucleotidase [EC:3.1.3.5]	2	2	1	1	0	3	2
K03789	rimI; [ribosomal protein S18]-alanine N-acetyltransferase [EC:2.3.1.266]	1	2	0	1	1	1	1
K03790	rimJ; [ribosomal protein S5]-alanine N-acetyltransferase [EC:2.3.1.267]	1	1	1	1	1	1	1
K03791	K03791; putative chitinase	1	0	0	0	0	0	1
K03794	sirB; sirohydrochlorin ferrochelatase [EC:4.99.1.4]	0	0	1	0	0	0	0
K03795	cbiX; sirohydrochlorin cobaltochelatase [EC:4.99.1.3]	0	0	0	0	0	1	0
K03798	ftsH, hflB; cell division protease FtsH [EC:3.4.24.-]	2	1	1	2	2	3	2
K03799	htpX; heat shock protein HtpX [EC:3.4.24.-]	1	2	2	1	2	1	1
K03800	lplA, lplJ, lipL1; lipoate---protein ligase [EC:6.3.1.20]	0	0	0	0	1	0	0
K03802	cphA; cyanophycin synthetase [EC:6.3.2.29 6.3.2.30]	0	1	0	0	0	0	0
K03809	wrbA; NAD(P)H dehydrogenase (quinone) [EC:1.6.5.2]	0	0	0	0	1	0	0
K03810	mviM; virulence factor	0	0	0	0	0	1	0
K03811	pnuC; nicotinamide mononucleotide transporter	0	0	0	0	0	1	0
K03820	lnt; apolipoprotein N-acyltransferase [EC:2.3.1.269]	1	1	1	1	1	1	1
K03821	phbC, phaC; polyhydroxyalkanoate synthase subunit PhaC [EC:2.3.1.-]	1	0	0	0	0	0	1
K03823	pat, bar; phosphinothricin acetyltransferase [EC:2.3.1.183]	3	1	1	1	1	2	1
K03824	yhbS; putative acetyltransferase [EC:2.3.1.-]	0	0	1	0	0	0	1
K03825	aaaT; L-phenylalanine/L-methionine N-acetyltransferase [EC:2.3.1.53 2.3.1.-]	1	0	0	0	0	0	0
K03833	selB, EEFSEC; selenocysteine-specific elongation factor	1	0	0	0	0	0	1
K03851	tpa; taurine-pyruvate aminotransferase [EC:2.6.1.77]	0	0	0	0	1	0	0
K03855	fixX; ferredoxin like protein	0	0	0	0	0	1	1
K03885	ndh; NADH:ubiquinone reductase (H+-translocating) [EC:7.1.1.2]	1	1	2	0	0	1	0
K03887	MQCRB, qcrB, bfcB, petB; menaquinol-cytochrome c reductase cytochrome b subunit	1	1	1	1	1	1	1
K03889	qcrC; ubiquinol-cytochrome c reductase cytochrome c subunit	1	1	0	1	0	1	0
K03890	qcrA; ubiquinol-cytochrome c reductase iron-sulfur subunit	1	1	0	1	0	1	0
K03891	qcrB; ubiquinol-cytochrome c reductase cytochrome b subunit	1	1	0	1	0	1	0
K03892	arsR; ArsR family transcriptional regulator, arsenate/arsenite/antimonite-responsive transcriptional repressor	2	1	1	1	2	1	1
K03893	arsB; arsenical pump membrane protein	0	1	0	1	0	1	0
K03921	FAB2, SSI2, desA1; acyl-[acyl-carrier-protein] desaturase [EC:1.14.19.2 1.14.19.11 1.14.19.26]	1	1	1	0	1	0	0
K03924	moxR; MoxR-like ATPase [EC:3.6.3.-]	3	3	5	4	2	5	2
K03925	mraZ; MraZ protein	0	0	0	1	1	1	1
K03926	cutA; periplasmic divalent cation tolerance protein	0	0	0	0	0	0	1
K03928	yvaK; carboxylesterase [EC:3.1.1.1]	0	1	1	0	1	1	0
K03929	pnbA; para-nitrobenzyl esterase [EC:3.1.1.-]	0	1	0	0	3	1	2
K03932	lpqC; polyhydroxybutyrate depolymerase	0	2	2	0	0	3	0
K03969	pspA; phage shock protein A	1	1	1	1	1	1	1
K03975	dedA; membrane-associated protein	0	0	0	1	0	1	0
K03976	ybaK, ebsC; Cys-tRNA(Pro)/Cys-tRNA(Cys) deacylase [EC:3.1.1.-]	1	0	0	0	1	0	0
K03977	engA, der; GTPase	1	1	1	1	1	1	1
K03978	engB; GTP-binding protein	1	1	1	0	0	0	0
K03979	obgE, cgtA, MTG2; GTPase [EC:3.6.5.-]	1	1	2	1	1	1	1
K03980	murJ, mviN; putative peptidoglycan lipid II flippase	1	1	1	1	2	1	1
K04042	glmU; bifunctional UDP-N-acetylglucosamine pyrophosphorylase / glucosamine-1-phosphate N-acetyltransferase [EC:2.7.7.23 2.3.1.157]	1	1	1	1	1	1	1
K04043	dnaK, HSPA9; molecular chaperone DnaK	1	1	1	1	1	2	1
K04047	dps; starvation-inducible DNA-binding protein	1	1	0	0	0	1	1
K04063	osmC, ohr; lipoyl-dependent peroxiredoxin [EC:1.11.1.28]	0	1	0	1	1	0	0
K04066	priA; primosomal protein N' (replication factor Y) (superfamily II helicase) [EC:3.6.4.-]	1	1	1	1	1	1	1
K04069	pflA, pflC, pflE; pyruvate formate lyase activating enzyme [EC:1.97.1.4]	0	0	0	1	1	0	1
K04073	mhpF; acetaldehyde dehydrogenase [EC:1.2.1.10]	0	0	0	0	0	1	0
K04074	divIVA; cell division initiation protein	0	1	0	1	0	0	0
K04075	tilS, mesJ; tRNA(Ile)-lysidine synthase [EC:6.3.4.19]	1	1	1	1	1	0	1
K04077	groEL, HSPD1; chaperonin GroEL	2	2	2	2	2	2	2
K04078	groES, HSPE1; chaperonin GroES	2	2	2	2	2	2	2
K04091	ssuD; alkanesulfonate monooxygenase [EC:1.14.14.5]	2	2	3	2	1	3	1
K04092	tyrA1; chorismate mutase [EC:5.4.99.5]	1	0	0	0	1	0	0
K04096	smf; DNA processing protein	1	1	2	2	2	1	1
K04116	aliA; cyclohexanecarboxylate-CoA ligase [EC:6.2.1.-]	0	0	0	1	0	0	1
K04343	strB; streptomycin 6-kinase [EC:2.7.1.72]	0	1	1	0	1	0	0
K04477	ycdX; putative hydrolase	1	2	1	1	1	1	1
K04485	radA, sms; DNA repair protein RadA/Sms	1	1	2	1	1	1	1
K04487	iscS, NFS1; cysteine desulfurase [EC:2.8.1.7]	2	3	2	2	2	2	2
K04488	iscU, nifU; nitrogen fixation protein NifU and related proteins	1	1	1	1	1	1	1
K04518	pheA2; prephenate dehydratase [EC:4.2.1.51]	1	2	1	1	1	1	1
K04564	SOD2; superoxide dismutase, Fe-Mn family [EC:1.15.1.1]	0	0	1	1	1	1	1
K04567	KARS, lysS; lysyl-tRNA synthetase, class II [EC:6.1.1.6]	1	2	1	2	1	2	1
K04653	hypC; hydrogenase expression/formation protein HypC	0	0	0	1	0	0	0
K04708	KDSR; 3-dehydrosphinganine reductase [EC:1.1.1.102]	0	1	0	0	0	0	0
K04749	rsbV; anti-sigma B factor antagonist	2	2	5	2	3	2	2
K04750	phnB; PhnB protein	2	1	0	0	3	2	1
K04751	glnB; nitrogen regulatory protein P-II 1	2	3	1	2	2	1	2
K04757	rsbW; serine/threonine-protein kinase RsbW [EC:2.7.11.1]	2	1	2	3	2	1	0
K04761	oxyR; LysR family transcriptional regulator, hydrogen peroxide-inducible genes activator	1	1	2	1	2	2	2
K04762	hslR; ribosome-associated heat shock protein Hsp15	1	1	1	0	1	1	1
K04763	xerD; integrase/recombinase XerD	1	1	1	2	1	1	1
K04771	degP, htrA; serine protease Do [EC:3.4.21.107]	2	1	1	2	0	2	3
K04772	degQ, hhoA; serine protease DegQ [EC:3.4.21.-]	0	0	0	0	1	0	0
K05275	E1.1.1.65; pyridoxine 4-dehydrogenase [EC:1.1.1.65]	0	0	2	0	0	1	0
K05303	K05303; O-methyltransferase [EC:2.1.1.-]	0	0	0	0	0	2	0
K05337	fer; ferredoxin	4	5	4	5	4	5	3
K05342	treP; alpha,alpha-trehalose phosphorylase [EC:2.4.1.64]	1	0	0	0	1	1	1
K05343	treS; maltose alpha-D-glucosyltransferase / alpha-amylase [EC:5.4.99.16 3.2.1.1]	0	1	1	1	2	1	1
K05349	bglX; beta-glucosidase [EC:3.2.1.21]	2	2	3	1	1	3	1
K05350	bglB; beta-glucosidase [EC:3.2.1.21]	0	0	2	2	2	2	1
K05364	pbpA; penicillin-binding protein A	1	1	2	1	1	1	1
K05366	mrcA; penicillin-binding protein 1A [EC:2.4.1.129 3.4.16.4]	2	1	0	1	0	1	0
K05386	cpeZ; bilin biosynthesis protein	0	0	0	0	0	1	0
K05396	dcyD; D-cysteine desulfhydrase [EC:4.4.1.15]	0	0	0	1	0	1	0
K05515	mrdA; penicillin-binding protein 2 [EC:3.4.16.4]	1	1	0	1	0	1	0
K05516	cbpA; curved DNA-binding protein	1	0	1	0	0	2	0
K05518	rsbX; phosphoserine phosphatase RsbX [EC:3.1.3.3]	0	0	0	0	0	1	0
K05520	pfpI; protease I [EC:3.5.1.124]	1	1	1	0	1	1	1
K05521	draG; ADP-ribosyl-[dinitrogen reductase] hydrolase [EC:3.2.2.24]	0	0	0	0	1	0	0
K05522	nei; endonuclease VIII [EC:3.2.2.- 4.2.99.18]	2	2	2	0	1	1	1
K05524	fdxA; ferredoxin	0	0	1	0	0	0	0
K05525	linC, CYP111A; linalool 8-monooxygenase [EC:1.14.14.84]	0	0	0	0	0	0	1
K05555	actIV; cyclase [EC:4.-.-.-]	0	0	0	0	0	1	0
K05561	phaD; multicomponent K+:H+ antiporter subunit D	0	0	0	0	0	0	1
K05565	mnhA, mrpA; multicomponent Na+:H+ antiporter subunit A	1	1	1	1	2	1	1
K05566	mnhB, mrpB; multicomponent Na+:H+ antiporter subunit B	0	0	0	0	0	0	2
K05567	mnhC, mrpC; multicomponent Na+:H+ antiporter subunit C	1	1	1	1	1	1	1
K05568	mnhD, mrpD; multicomponent Na+:H+ antiporter subunit D	1	1	1	1	1	1	2
K05569	mnhE, mrpE; multicomponent Na+:H+ antiporter subunit E	1	1	1	1	1	1	1
K05570	mnhF, mrpF; multicomponent Na+:H+ antiporter subunit F	1	1	0	1	1	1	2
K05571	mnhG, mrpG; multicomponent Na+:H+ antiporter subunit G	1	0	1	1	1	1	2
K05576	ndhE; NAD(P)H-quinone oxidoreductase subunit 4L [EC:7.1.1.2]	0	1	0	0	0	0	0
K05577	ndhF; NAD(P)H-quinone oxidoreductase subunit 5 [EC:7.1.1.2]	0	0	0	0	0	1	0
K05589	ftsB; cell division protein FtsB	0	0	0	0	0	0	1
K05592	deaD, cshA; ATP-dependent RNA helicase DeaD [EC:3.6.4.13]	1	1	1	0	1	0	1
K05595	marC; multiple antibiotic resistance protein	0	0	0	0	1	0	0
K05606	MCEE, epi; methylmalonyl-CoA/ethylmalonyl-CoA epimerase [EC:5.1.99.1]	0	2	1	1	1	1	1
K05685	macB; macrolide transport system ATP-binding/permease protein [EC:3.6.3.-]	0	1	0	0	0	0	0
K05710	hcaC; 3-phenylpropionate/trans-cinnamate dioxygenase ferredoxin component	1	1	1	2	1	1	1
K05712	mhpA; 3-(3-hydroxy-phenyl)propionate hydroxylase [EC:1.14.13.127]	0	0	1	0	0	0	0
K05770	TSPO, BZRP; translocator protein	0	0	1	0	0	0	0
K05786	rarD; chloramphenicol-sensitive protein RarD	1	0	0	0	0	0	0
K05794	terC; tellurite resistance protein TerC	1	1	1	1	0	0	0
K05808	yhbH; putative sigma-54 modulation protein	0	1	1	0	0	0	0
K05810	yfiH; polyphenol oxidase [EC:1.10.3.-]	1	1	1	1	1	1	1
K05813	ugpB; sn-glycerol 3-phosphate transport system substrate-binding protein	0	0	1	2	0	0	1
K05824	LYS12; homoisocitrate dehydrogenase [EC:1.1.1.87]	0	1	0	0	0	0	0
K05825	LYSN; 2-aminoadipate transaminase [EC:2.6.1.-]	1	0	1	0	1	1	0
K05827	lysX; [lysine-biosynthesis-protein LysW]---L-2-aminoadipate ligase [EC:6.3.2.43]	1	1	0	0	0	0	0
K05837	rodA, mrdB; rod shape determining protein RodA	1	1	1	1	1	1	1
K05838	ybbN; putative thioredoxin	1	1	1	1	1	1	1
K05845	opuC; osmoprotectant transport system substrate-binding protein	0	3	1	0	0	0	0
K05846	opuBD; osmoprotectant transport system permease protein	2	3	1	0	2	2	2
K05847	opuA; osmoprotectant transport system ATP-binding protein [EC:7.6.2.9]	1	2	1	0	1	1	1
K05895	cobK-cbiJ; precorrin-6A/cobalt-precorrin-6A reductase [EC:1.3.1.54 1.3.1.106]	0	0	1	1	0	0	0
K05896	scpA; segregation and condensation protein A	1	1	1	1	1	1	1
K05898	kstD; 3-oxosteroid 1-dehydrogenase [EC:1.3.99.4]	0	0	0	0	0	1	1
K05913	dad; 2,4'-dihydroxyacetophenone dioxygenase [EC:1.13.11.41]	1	1	1	1	0	0	0
K05917	CYP51; sterol 14alpha-demethylase [EC:1.14.14.154 1.14.15.36]	1	1	1	0	0	1	0
K05934	E2.1.1.131, cobJ, cbiH; precorrin-3B C17-methyltransferase [EC:2.1.1.131]	0	0	1	1	0	0	0
K05936	cobM, cbiF; precorrin-4/cobalt-precorrin-4 C11-methyltransferase [EC:2.1.1.133 2.1.1.271]	0	0	1	1	0	0	0
K05946	tagA, tarA; N-acetylglucosaminyldiphosphoundecaprenol N-acetyl-beta-D-mannosaminyltransferase [EC:2.4.1.187]	1	0	0	0	1	0	0
K05973	phaZ; poly(3-hydroxybutyrate) depolymerase [EC:3.1.1.75]	0	0	0	0	0	0	1
K05979	comB; 2-phosphosulfolactate phosphatase [EC:3.1.3.71]	0	0	0	0	1	1	0
K05989	ramA; alpha-L-rhamnosidase [EC:3.2.1.40]	0	0	0	0	0	2	0
K05991	E3.2.1.123; endoglycosylceramidase [EC:3.2.1.123]	0	1	0	0	0	0	0
K05995	pepE; dipeptidase E [EC:3.4.13.21]	0	0	0	0	0	0	1
K05996	cpt; carboxypeptidase T [EC:3.4.17.18]	1	0	0	0	0	0	0
K06001	trpB; tryptophan synthase beta chain [EC:4.2.1.20]	0	0	0	1	0	0	1
K06013	STE24; STE24 endopeptidase [EC:3.4.24.84]	0	0	0	0	1	0	0
K06015	E3.5.1.81; N-acyl-D-amino-acid deacylase [EC:3.5.1.81]	0	0	0	1	0	1	1
K06016	pydC; beta-ureidopropionase / N-carbamoyl-L-amino-acid hydrolase [EC:3.5.1.6 3.5.1.87]	0	1	0	0	0	1	0
K06024	scpB; segregation and condensation protein B	1	1	0	1	1	1	1
K06042	cobH-cbiC; precorrin-8X/cobalt-precorrin-8 methylmutase [EC:5.4.99.61 5.4.99.60]	0	0	1	1	0	0	0
K06044	treY, glgY; (1->4)-alpha-D-glucan 1-alpha-D-glucosylmutase [EC:5.4.99.15]	0	1	1	0	0	1	1
K06048	gshA, ybdK; glutamate---cysteine ligase / carboxylate-amine ligase [EC:6.3.2.2 6.3.-.-]	0	2	2	0	1	2	0
K06075	slyA; MarR family transcriptional regulator, transcriptional regulator for hemolysin	0	0	0	0	0	0	1
K06131	clsA_B; cardiolipin synthase A/B [EC:2.7.8.-]	0	1	0	0	1	0	1
K06133	LYS5, acpT; 4'-phosphopantetheinyl transferase [EC:2.7.8.-]	0	0	0	0	1	0	0
K06147	ABCB-BAC; ATP-binding cassette, subfamily B, bacterial	11	4	10	3	8	8	4
K06151	E1.1.99.3A; gluconate 2-dehydrogenase alpha chain [EC:1.1.99.3]	1	0	0	0	0	0	0
K06153	bacA; undecaprenyl-diphosphatase [EC:3.6.1.27]	1	1	1	1	2	1	1
K06158	ABCF3; ATP-binding cassette, subfamily F, member 3	1	0	0	0	0	1	0
K06168	miaB; tRNA-2-methylthio-N6-dimethylallyladenosine synthase [EC:2.8.4.3]	1	1	1	1	1	1	1
K06173	truA, PUS1; tRNA pseudouridine38-40 synthase [EC:5.4.99.12]	1	1	1	1	1	1	1
K06178	rluB; 23S rRNA pseudouridine2605 synthase [EC:5.4.99.22]	1	1	1	1	1	1	1
K06180	rluD; 23S rRNA pseudouridine1911/1915/1917 synthase [EC:5.4.99.23]	1	1	1	1	1	1	1
K06187	recR; recombination protein RecR	1	1	1	1	1	1	1
K06188	aqpZ; aquaporin Z	1	0	1	0	1	1	1
K06193	phnA; protein PhnA	1	0	0	0	0	0	0
K06196	ccdA; cytochrome c-type biogenesis protein	0	1	0	0	0	0	0
K06199	crcB, FEX; fluoride exporter	2	2	1	2	2	0	2
K06204	dksA; DnaK suppressor protein	3	1	2	1	3	1	1
K06207	typA, bipA; GTP-binding protein	1	1	1	1	1	1	1
K06208	aroH; chorismate mutase [EC:5.4.99.5]	0	1	0	1	0	1	1
K06213	mgtE; magnesium transporter	0	0	0	0	1	0	1
K06215	pdxS, pdx1; pyridoxal 5'-phosphate synthase pdxS subunit [EC:4.3.3.6]	1	1	1	1	1	1	1
K06217	phoH, phoL; phosphate starvation-inducible protein PhoH and related proteins	1	1	1	1	1	1	1
K06221	dkgA; 2,5-diketo-D-gluconate reductase A [EC:1.1.1.346]	0	1	0	0	0	0	1
K06222	dkgB; 2,5-diketo-D-gluconate reductase B [EC:1.1.1.346]	0	1	0	0	0	0	0
K06287	maf; septum formation protein	1	1	1	0	1	2	1
K06346	jag; spoIIIJ-associated protein	1	1	1	1	1	1	1
K06378	spoIIAA; stage II sporulation protein AA (anti-sigma F factor antagonist)	0	0	0	0	0	3	0
K06381	spoIID; stage II sporulation protein D	0	0	0	0	0	1	0
K06398	spoIVA; stage IV sporulation protein A	0	0	0	1	0	0	0
K06401	spoIVFA; stage IV sporulation protein FA	0	0	0	1	0	0	0
K06402	spoIVFB; stage IV sporulation protein FB [EC:3.4.24.-]	0	0	0	0	0	1	0
K06416	spoVS; stage V sporulation protein S	1	1	0	0	0	0	0
K06442	tlyA; 23S rRNA (cytidine1920-2'-O)/16S rRNA (cytidine1409-2'-O)-methyltransferase [EC:2.1.1.226 2.1.1.227]	1	1	1	1	1	1	1
K06718	ectA; L-2,4-diaminobutyric acid acetyltransferase [EC:2.3.1.178]	0	1	0	0	1	0	1
K06720	ectC; L-ectoine synthase [EC:4.2.1.108]	1	1	0	0	1	0	1
K06864	larE; pyridinium-3,5-biscarboxylic acid mononucleotide sulfurtransferase [EC:4.4.1.37]	1	1	1	1	1	0	1
K06867	K06867; uncharacterized protein	0	1	0	0	0	0	0
K06871	K06871; uncharacterized protein	0	0	0	1	0	0	0
K06876	K06876; deoxyribodipyrimidine photolyase-related protein	0	1	0	0	0	0	1
K06877	K06877; DEAD/DEAH box helicase domain-containing protein	1	1	1	1	1	1	1
K06878	K06878; tRNA-binding protein	0	0	1	0	0	1	0
K06880	ereA_B; erythromycin esterase [EC:3.1.1.-]	0	0	0	0	1	0	0
K06886	glbN; hemoglobin	3	2	6	2	2	1	2
K06888	K06888; uncharacterized protein	1	1	0	1	1	1	1
K06889	K06889; uncharacterized protein	1	0	0	0	1	0	1
K06890	K06890; uncharacterized protein	1	0	0	0	0	0	0
K06891	clpS; ATP-dependent Clp protease adaptor protein ClpS	1	1	1	1	1	1	1
K06893	K06893; uncharacterized protein	0	0	1	0	0	3	1
K06897	K06897; 7,8-dihydropterin-6-yl-methyl-4-(beta-D-ribofuranosyl)aminobenzene 5'-phosphate synthase [EC:2.5.1.105]	0	0	0	0	1	0	0
K06898	larB; pyridinium-3,5-biscarboxylic acid mononucleotide synthase [EC:2.5.1.143]	1	1	1	1	1	1	1
K06904	K06904; uncharacterized protein	0	1	0	0	0	0	0
K06910	PEBP, TFS1; phosphatidylethanolamine-binding protein	1	1	1	1	1	0	1
K06911	PIR; quercetin 2,3-dioxygenase [EC:1.13.11.24]	3	3	3	2	3	4	3
K06915	K06915; uncharacterized protein	1	2	3	0	0	0	1
K06920	queC; 7-cyano-7-deazaguanine synthase [EC:6.3.4.20]	1	0	1	1	0	0	1
K06922	K06922; uncharacterized protein	0	0	1	0	0	0	0
K06925	tsaE; tRNA threonylcarbamoyladenosine biosynthesis protein TsaE	1	1	1	1	1	1	1
K06929	K06929; uncharacterized protein	0	1	0	0	0	0	1
K06941	rlmN; 23S rRNA (adenine2503-C2)-methyltransferase [EC:2.1.1.192]	1	1	1	1	1	1	1
K06942	ychF; ribosome-binding ATPase	1	1	1	1	1	1	1
K06945	K06945; uncharacterized protein	1	1	1	1	1	1	1
K06949	rsgA, engC; ribosome biogenesis GTPase / thiamine phosphate phosphatase [EC:3.6.1.- 3.1.3.100]	1	1	1	1	1	1	1
K06954	K06954; uncharacterized protein	0	1	1	0	1	0	0
K06955	#N/A	0	0	0	0	0	0	1
K06958	rapZ; RNase adapter protein RapZ	1	1	1	1	1	1	1
K06960	K06960; uncharacterized protein	1	1	1	1	1	1	1
K06962	K06962; uncharacterized protein	0	1	0	0	0	0	0
K06966	ppnN; pyrimidine/purine-5'-nucleotide nucleosidase [EC:3.2.2.10 3.2.2.-]	2	2	1	3	4	2	2
K06969	rlmI; 23S rRNA (cytosine1962-C5)-methyltransferase [EC:2.1.1.191]	1	0	0	0	0	1	1
K06975	K06975; uncharacterized protein	2	1	1	0	2	2	0
K06977	K06977; uncharacterized protein	1	0	1	0	0	1	0
K06978	K06978; uncharacterized protein	0	2	3	3	0	2	1
K06980	ygfZ; tRNA-modifying protein YgfZ	1	1	1	1	1	1	1
K06987	K06987; uncharacterized protein	0	1	0	0	0	0	0
K06988	fno; 8-hydroxy-5-deazaflavin:NADPH oxidoreductase [EC:1.5.1.40]	1	1	1	1	1	1	1
K06990	MEMO1; MEMO1 family protein	0	0	0	1	0	0	2
K06991	K06991; uncharacterized protein	0	0	1	0	0	1	0
K06994	K06994; putative drug exporter of the RND superfamily	6	6	7	2	7	4	3
K06996	K06996; uncharacterized protein	2	3	2	0	0	2	1
K06997	yggS, PROSC; PLP dependent protein	1	1	1	1	1	1	1
K06998	phzF; trans-2,3-dihydro-3-hydroxyanthranilate isomerase [EC:5.3.3.17]	0	0	0	0	1	1	0
K06999	K06999; phospholipase/carboxylesterase	1	0	0	0	0	0	0
K07001	K07001; NTE family protein	4	5	4	0	1	3	2
K07003	K07003; uncharacterized protein	1	1	1	1	0	1	1
K07005	K07005; uncharacterized protein	2	2	3	1	2	2	1
K07006	K07006; uncharacterized protein	2	1	1	0	1	2	0
K07008	egtC; gamma-glutamyl hercynylcysteine S-oxide hydrolase [EC:3.5.1.118]	0	1	0	1	0	0	0
K07009	gatD; lipid II isoglutaminyl synthase (glutamine-hydrolysing) [EC:6.3.5.13]	0	0	0	1	0	0	1
K07010	K07010; putative glutamine amidotransferase	1	1	0	0	1	0	0
K07011	#N/A	2	0	0	1	1	1	3
K07012	cas3; CRISPR-associated endonuclease/helicase Cas3 [EC:3.1.-.- 3.6.4.-]	0	0	0	1	0	1	0
K07018	K07018; uncharacterized protein	1	0	0	1	0	0	1
K07020	K07020; uncharacterized protein	1	1	1	1	1	1	1
K07023	K07023; putative hydrolases of HD superfamily	1	0	0	0	0	0	0
K07025	K07025; putative hydrolase of the HAD superfamily	4	4	3	2	5	3	0
K07027	K07027; glycosyltransferase 2 family protein	2	3	2	2	2	1	2
K07028	K07028; uncharacterized protein	0	1	0	1	1	0	2
K07029	dagK; diacylglycerol kinase (ATP) [EC:2.7.1.107]	2	0	0	0	0	0	0
K07030	K07030; uncharacterized protein	1	1	2	1	1	0	1
K07032	K07032; uncharacterized protein	1	0	1	0	0	2	1
K07033	K07033; uncharacterized protein	0	0	1	0	0	0	0
K07040	K07040; uncharacterized protein	1	1	2	2	1	1	1
K07042	ybeY, yqfG; probable rRNA maturation factor	1	1	1	1	1	1	1
K07043	upp; UTP pyrophosphatase [EC:3.6.1.-]	0	0	1	0	0	0	1
K07044	K07044; uncharacterized protein	4	3	1	0	1	3	0
K07045	K07045; uncharacterized protein	1	2	1	3	0	3	2
K07046	K07046; L-fuconolactonase [EC:3.1.1.-]	1	0	0	0	0	0	0
K07048	PTER, php; phosphotriesterase-related protein	0	1	0	0	0	0	0
K07050	AARSD1, ALAX; misacylated tRNA(Ala) deacylase [EC:3.1.1.-]	0	1	0	0	1	0	0
K07052	K07052; uncharacterized protein	1	3	1	2	2	2	2
K07054	K07054; uncharacterized protein	1	1	1	0	1	2	0
K07056	rsmI; 16S rRNA (cytidine1402-2'-O)-methyltransferase [EC:2.1.1.198]	1	1	1	1	1	1	1
K07058	K07058; membrane protein	1	1	1	1	2	1	2
K07059	K07059; uncharacterized protein	1	0	0	0	0	0	0
K07064	K07064; uncharacterized protein	2	1	1	1	2	1	1
K07067	disA; diadenylate cyclase [EC:2.7.7.85]	1	1	1	1	1	1	1
K07068	K07068; uncharacterized protein	4	8	4	7	6	4	5
K07069	K07069; uncharacterized protein	0	1	0	0	0	0	0
K07071	K07071; uncharacterized protein	1	1	1	1	2	1	1
K07074	K07074; uncharacterized protein	0	0	0	0	0	1	0
K07075	K07075; uncharacterized protein	0	0	1	2	0	0	0
K07082	K07082; UPF0755 protein	1	1	1	1	1	1	1
K07085	K07085; putative transport protein	0	0	0	0	1	0	0
K07086	K07086; uncharacterized protein	0	0	0	1	0	0	0
K07089	K07089; uncharacterized protein	0	1	0	0	0	0	0
K07090	K07090; uncharacterized protein	3	5	2	4	3	4	1
K07093	K07093; uncharacterized protein	1	0	1	0	0	0	0
K07095	K07095; uncharacterized protein	0	1	1	0	1	1	1
K07098	K07098; uncharacterized protein	0	1	2	0	0	1	0
K07100	K07100; putative phosphoribosyl transferase	0	1	0	1	1	1	1
K07101	K07101; uncharacterized protein	0	1	1	0	0	1	0
K07104	catE; catechol 2,3-dioxygenase [EC:1.13.11.2]	0	0	0	0	0	1	0
K07107	ybgC; acyl-CoA thioester hydrolase [EC:3.1.2.-]	0	2	1	0	0	1	1
K07113	fxsA; UPF0716 protein FxsA	1	0	0	1	0	1	1
K07114	yfbK; Ca-activated chloride channel homolog	1	1	3	1	0	1	1
K07116	pvdQ, quiP; acyl-homoserine-lactone acylase [EC:3.5.1.97]	1	0	1	1	0	0	0
K07119	PTGR3, ZADH2; prostaglandin reductase 3 [EC:1.3.1.48]	1	2	2	1	0	1	0
K07123	K07123; uncharacterized protein	0	1	0	0	0	0	0
K07124	K07124; uncharacterized protein	0	1	2	1	0	2	0
K07127	uraH, pucM, hiuH; 5-hydroxyisourate hydrolase [EC:3.5.2.17]	0	0	0	0	0	1	0
K07131	K07131; uncharacterized protein	1	1	0	2	1	1	1
K07140	K07140; uncharacterized protein	2	1	1	0	2	1	1
K07141	mocA; molybdenum cofactor cytidylyltransferase [EC:2.7.7.76]	1	1	0	1	1	0	1
K07148	K07148; uncharacterized protein	0	0	0	0	0	0	2
K07149	K07149; uncharacterized protein	1	0	1	0	1	0	0
K07152	SCO1; protein SCO1	0	2	1	2	3	0	3
K07156	copC, pcoC; copper resistance protein C	0	0	0	1	0	1	0
K07161	K07161; uncharacterized protein	2	2	1	1	2	1	2
K07164	K07164; uncharacterized protein	1	1	1	1	1	1	1
K07171	mazF, ndoA, chpA; mRNA interferase MazF [EC:3.1.-.-]	1	1	2	0	2	0	0
K07175	phoH2; PhoH-like ATPase	1	1	1	1	1	1	1
K07177	K07177; Lon-like protease	1	1	1	1	1	1	1
K07178	RIOK1; RIO kinase 1 [EC:2.7.11.1]	1	0	0	0	0	0	0
K07182	K07182; CBS domain-containing protein	0	1	1	1	0	0	1
K07183	nasT; two-component system, response regulator / RNA-binding antiterminator	1	0	0	0	0	0	0
K07192	FLOT; flotillin	1	1	1	0	1	0	1
K07213	ATOX1, ATX1, copZ, golB; copper chaperone	1	0	0	1	2	1	1
K07214	fes; iron(III)-enterobactin esterase [EC:3.1.1.108]	1	0	0	0	0	0	0
K07222	K07222; putative flavoprotein involved in K+ transport	0	0	0	0	0	0	1
K07223	yfeX; porphyrinogen peroxidase [EC:1.11.1.-]	0	0	1	0	0	1	0
K07224	efeO; iron uptake system component EfeO	0	1	0	1	0	1	0
K07226	hugZ, hutZ; heme iron utilization protein	0	0	1	0	0	0	0
K07228	K07228; TrkA domain protein	1	1	0	1	1	0	1
K07231	K07231; putative iron-regulated protein	0	0	1	0	0	0	0
K07238	TC.ZIP, zupT, ZRT3, ZIP2; zinc transporter, ZIP family	0	0	1	0	0	1	0
K07243	FTR, FTH1, efeU; high-affinity iron transporter	1	0	0	0	0	1	0
K07245	pcoD; copper resistance protein D	0	0	0	1	0	1	0
K07250	gabT; 4-aminobutyrate aminotransferase / (S)-3-amino-2-methylpropionate transaminase / 5-aminovalerate transaminase [EC:2.6.1.19 2.6.1.22 2.6.1.48]	0	0	1	0	0	0	0
K07258	dacC, dacA, dacD; serine-type D-Ala-D-Ala carboxypeptidase (penicillin-binding protein 5/6) [EC:3.4.16.4]	0	1	0	0	0	0	0
K07259	dacB; serine-type D-Ala-D-Ala carboxypeptidase/endopeptidase (penicillin-binding protein 4) [EC:3.4.16.4 3.4.21.-]	1	1	1	1	1	1	2
K07260	vanY; zinc D-Ala-D-Ala carboxypeptidase [EC:3.4.17.14]	4	3	3	2	2	2	2
K07272	rgpF; rhamnosyltransferase [EC:2.4.1.-]	0	0	0	0	0	0	1
K07282	capA, pgsA; gamma-polyglutamate biosynthesis protein CapA	1	1	0	0	0	2	1
K07284	srtA; sortase A [EC:3.4.22.70]	3	2	1	2	3	1	0
K07301	yrbG; cation:H+ antiporter	1	1	0	1	2	0	3
K07304	msrA; peptide-methionine (S)-S-oxide reductase [EC:1.8.4.11]	1	1	0	1	1	1	1
K07305	msrB; peptide-methionine (R)-S-oxide reductase [EC:1.8.4.12]	1	1	1	1	1	1	1
K07315	rsbU_P; phosphoserine phosphatase RsbU/P [EC:3.1.3.3]	1	0	1	1	2	1	0
K07316	mod; adenine-specific DNA-methyltransferase [EC:2.1.1.72]	0	2	0	0	1	0	0
K07317	K07317; adenine-specific DNA-methyltransferase [EC:2.1.1.72]	0	0	0	2	0	0	0
K07322	ytfE, scdA; regulator of cell morphogenesis and NO signaling	0	0	1	1	1	0	0
K07335	bmpA, bmpB, tmpC; basic membrane protein A and related proteins	1	1	2	0	1	0	0
K07336	K07336; PKHD-type hydroxylase [EC:1.14.11.-]	0	0	0	0	1	2	0
K07340	ybbJ; inner membrane protein	1	1	0	1	2	1	0
K07341	doc; death on curing protein	0	0	0	0	2	1	1
K07391	comM; magnesium chelatase family protein	1	1	1	1	1	1	1
K07393	ECM4, yqjG; glutathionyl-hydroquinone reductase [EC:1.8.5.7]	0	1	0	0	0	1	1
K07395	K07395; putative proteasome-type protease	0	0	1	0	0	1	0
K07400	nfuA; Fe/S biogenesis protein NfuA	1	1	1	1	1	1	1
K07402	xdhC; xanthine dehydrogenase accessory factor	1	1	0	1	1	1	1
K07403	nfeD; membrane-bound serine protease (ClpP class)	1	1	1	1	0	0	1
K07407	E3.2.1.22B, galA, rafA; alpha-galactosidase [EC:3.2.1.22]	1	1	1	1	1	1	1
K07442	TRM61, GCD14; tRNA (adenine57-N1/adenine58-N1)-methyltransferase catalytic subunit [EC:2.1.1.219 2.1.1.220]	1	1	1	1	1	1	1
K07443	ybaZ; methylated-DNA-protein-cysteine methyltransferase related protein	0	0	0	0	1	0	0
K07444	ypsC; putative N6-adenine-specific DNA methylase [EC:2.1.1.-]	0	1	0	1	0	0	0
K07445	K07445; putative DNA methylase	0	0	1	0	0	0	0
K07447	ruvX; putative holliday junction resolvase [EC:3.1.-.-]	1	1	1	1	1	1	1
K07451	mcrA; 5-methylcytosine-specific restriction enzyme A [EC:3.1.21.-]	1	0	0	0	0	0	0
K07452	mcrB; 5-methylcytosine-specific restriction enzyme B [EC:3.1.21.-]	0	1	1	0	1	0	1
K07454	K07454; putative restriction endonuclease	0	0	0	0	1	0	1
K07458	vsr; DNA mismatch endonuclease, patch repair protein [EC:3.1.-.-]	0	0	1	1	0	0	0
K07459	ybjD; putative ATP-dependent endonuclease of the OLD family	0	0	1	0	0	0	0
K07460	yraN; putative endonuclease	1	1	1	1	1	1	1
K07465	K07465; putative RecB family exonuclease	1	1	1	1	0	1	1
K07477	K07477; translin	1	1	0	1	0	1	1
K07478	ycaJ; putative ATPase	1	1	0	1	1	1	1
K07483	K07483; transposase	1	3	0	2	5	1	1
K07485	K07485; transposase	0	0	0	1	0	0	0
K07486	K07486; transposase	0	0	0	2	0	0	0
K07493	K07493; putative transposase	0	0	0	2	5	0	0
K07497	K07497; putative transposase	0	1	0	12	1	0	1
K07503	nucS; endonuclease [EC:3.1.-.-]	1	1	1	1	1	1	1
K07507	mgtC; putative Mg2+ transporter-C (MgtC) family protein	1	1	0	0	1	0	0
K07535	badH; 2-hydroxycyclohexanecarboxyl-CoA dehydrogenase [EC:1.1.1.-]	0	0	0	0	0	1	0
K07544	bbsF; benzylsuccinate CoA-transferase BbsF subunit [EC:2.8.3.15]	0	0	1	0	0	0	0
K07552	bcr, tcaB; MFS transporter, DHA1 family, multidrug resistance protein	1	0	0	0	0	0	0
K07560	dtd, DTD; D-aminoacyl-tRNA deacylase [EC:3.1.1.96]	1	2	1	1	1	1	1
K07566	tsaC, rimN, SUA5; L-threonylcarbamoyladenylate synthase [EC:2.7.7.87]	1	1	1	1	1	1	1
K07568	queA; S-adenosylmethionine:tRNA ribosyltransferase-isomerase [EC:2.4.99.17]	1	2	2	1	2	1	1
K07576	K07576; metallo-beta-lactamase family protein	0	0	0	1	2	0	1
K07586	ygaC; uncharacterized protein	0	0	0	0	1	0	0
K07588	argK; LAO/AO transport system kinase [EC:2.7.-.-]	2	2	2	2	2	2	2
K07636	phoR; two-component system, OmpR family, phosphate regulon sensor histidine kinase PhoR [EC:2.7.13.3]	1	0	0	1	0	1	1
K07642	baeS, smeS; two-component system, OmpR family, sensor histidine kinase BaeS [EC:2.7.13.3]	1	0	0	1	0	0	0
K07646	kdpD; two-component system, OmpR family, sensor histidine kinase KdpD [EC:2.7.13.3]	0	0	0	0	0	2	0
K07653	mprB; two-component system, OmpR family, sensor histidine kinase MprB [EC:2.7.13.3]	0	0	0	1	1	1	1
K07654	mtrB; two-component system, OmpR family, sensor histidine kinase MtrB [EC:2.7.13.3]	1	0	0	0	0	0	0
K07657	phoB; two-component system, OmpR family, phosphate regulon response regulator PhoB	1	0	0	0	0	0	0
K07667	kdpE; two-component system, OmpR family, KDP operon response regulator KdpE	3	2	1	2	1	1	1
K07669	mprA; two-component system, OmpR family, response regulator MprA	1	0	0	1	1	2	1
K07682	devS; two-component system, NarL family, sensor histidine kinase DevS [EC:2.7.13.3]	1	1	0	0	0	0	1
K07684	narL; two-component system, NarL family, nitrate/nitrite response regulator NarL	1	1	1	1	1	1	1
K07689	uvrY, gacA, varA; two-component system, NarL family, invasion response regulator UvrY	0	0	0	0	1	1	0
K07696	nreC; two-component system, NarL family, response regulator NreC	0	0	0	0	1	0	0
K07715	glrR, qseF; two-component system, NtrC family, response regulator GlrR	1	1	0	0	0	0	0
K07727	K07727; putative transcriptional regulator	0	0	0	0	0	1	0
K07729	K07729; putative transcriptional regulator	0	0	1	1	2	1	0
K07735	algH; putative transcriptional regulator	1	1	1	1	1	1	1
K07736	carD; CarD family transcriptional regulator	2	1	1	2	1	1	2
K07738	nrdR; transcriptional repressor NrdR	1	1	1	1	1	1	1
K07742	ylxR; uncharacterized protein	0	1	1	0	0	0	0
K07746	parD1_3_4; antitoxin ParD1/3/4	1	0	0	0	0	0	1
K07749	frc; formyl-CoA transferase [EC:2.8.3.16]	1	1	1	0	2	4	1
K07768	senX3; two-component system, OmpR family, sensor histidine kinase SenX3 [EC:2.7.13.3]	0	1	1	0	1	0	0
K07776	regX3; two-component system, OmpR family, response regulator RegX3	2	2	1	1	1	1	1
K07778	desK; two-component system, NarL family, sensor histidine kinase DesK [EC:2.7.13.3]	1	1	1	1	1	1	1
K07814	K07814; putative two-component system response regulator	1	0	0	0	0	0	0
K07978	plmA; GntR family transcriptional regulator	0	0	1	0	0	0	0
K07979	ytrA; GntR family transcriptional regulator	0	0	0	0	2	0	0
K08080	CMAH; CMP-N-acetylneuraminate monooxygenase [EC:1.14.18.2]	0	0	0	1	0	0	0
K08151	tetA; MFS transporter, DHA1 family, tetracycline resistance protein	0	0	0	1	0	0	0
K08167	smvA, qacA, lfrA; MFS transporter, DHA2 family, multidrug resistance protein	0	0	0	0	0	0	1
K08170	norB, norC; MFS transporter, DHA2 family, multidrug resistance protein	0	1	0	0	0	0	0
K08217	mef; MFS transporter, DHA3 family, macrolide efflux protein	0	1	0	0	1	0	1
K08234	yaeR; glyoxylase I family protein	1	1	1	1	1	1	2
K08252	E2.7.10.1; receptor protein-tyrosine kinase [EC:2.7.10.1]	0	0	0	1	0	1	0
K08253	E2.7.10.2; non-specific protein-tyrosine kinase [EC:2.7.10.2]	1	0	0	1	0	0	1
K08256	pimA; phosphatidyl-myo-inositol alpha-mannosyltransferase [EC:2.4.1.345]	1	2	2	1	1	1	2
K08281	pncA; nicotinamidase/pyrazinamidase [EC:3.5.1.19 3.5.1.-]	0	0	0	2	1	0	0
K08282	E2.7.11.1; non-specific serine/threonine protein kinase [EC:2.7.11.1]	0	2	2	0	1	0	0
K08296	sixA; phosphohistidine phosphatase [EC:3.1.3.-]	0	0	0	1	0	0	0
K08297	caiA; crotonobetainyl-CoA dehydrogenase [EC:1.3.8.13]	1	0	1	0	0	0	0
K08299	caiD; crotonobetainyl-CoA hydratase [EC:4.2.1.149]	0	1	0	1	1	1	0
K08300	rne; ribonuclease E [EC:3.1.26.12]	1	1	1	1	1	1	1
K08310	nudB, ntpA; dihydroneopterin triphosphate diphosphatase [EC:3.6.1.67]	1	1	0	1	1	1	1
K08316	rsmD; 16S rRNA (guanine966-N2)-methyltransferase [EC:2.1.1.171]	1	1	0	1	1	1	1
K08352	phsA, psrA; thiosulfate reductase / polysulfide reductase chain A [EC:1.8.5.5]	0	0	0	0	0	1	0
K08365	merR; MerR family transcriptional regulator, mercuric resistance operon regulatory protein	0	0	0	0	0	1	0
K08369	ydjE; MFS transporter, putative metabolite:H+ symporter	0	1	0	0	1	1	0
K08372	pepD; putative serine protease PepD [EC:3.4.21.-]	0	1	2	0	1	1	0
K08591	plsY; acyl phosphate:glycerol-3-phosphate acyltransferase [EC:2.3.1.275]	3	1	0	1	1	0	0
K08602	pepF, pepB; oligoendopeptidase F [EC:3.4.24.-]	1	1	1	0	1	1	1
K08640	E3.4.17.14; zinc D-Ala-D-Ala carboxypeptidase [EC:3.4.17.14]	0	0	0	0	0	0	1
K08641	vanX; zinc D-Ala-D-Ala dipeptidase [EC:3.4.13.22]	1	0	0	0	0	2	0
K08664	PRSS8; prostasin [EC:3.4.21.-]	0	1	0	0	0	0	0
K08680	menH; 2-succinyl-6-hydroxy-2,4-cyclohexadiene-1-carboxylate synthase [EC:4.2.99.20]	1	1	1	1	1	1	1
K08681	pdxT, pdx2; pyridoxal 5'-phosphate synthase pdxT subunit [EC:4.3.3.6]	1	1	1	1	1	1	1
K08691	mcl; malyl-CoA/(S)-citramalyl-CoA lyase [EC:4.1.3.24 4.1.3.25]	0	0	1	1	0	0	0
K08726	EPHX2; soluble epoxide hydrolase / lipid-phosphate phosphatase [EC:3.3.2.10 3.1.3.76]	0	1	0	0	0	0	0
K08744	CRLS; cardiolipin synthase (CMP-forming) [EC:2.7.8.41]	1	1	0	1	1	1	1
K08776	NPEPPS; puromycin-sensitive aminopeptidase [EC:3.4.11.-]	1	1	1	1	1	0	1
K08884	K08884; serine/threonine protein kinase, bacterial [EC:2.7.11.1]	3	2	4	1	2	2	1
K08972	K08972; putative membrane protein	0	0	0	0	1	0	0
K08974	K08974; putative membrane protein	1	1	0	1	1	0	1
K08981	K08981; putative membrane protein	0	1	0	0	0	0	1
K08982	K08982; putative membrane protein	0	0	0	1	0	0	1
K08992	lapA; lipopolysaccharide assembly protein A	0	0	0	0	0	1	0
K08998	K08998; uncharacterized protein	1	1	1	1	1	1	1
K08999	K08999; uncharacterized protein	1	1	1	1	1	1	1
K09005	K09005; uncharacterized protein	2	2	2	1	2	1	2
K09009	K09009; uncharacterized protein	1	1	1	1	1	1	1
K09013	sufC; Fe-S cluster assembly ATP-binding protein	2	2	3	2	2	2	3
K09014	sufB; Fe-S cluster assembly protein SufB	1	1	2	1	1	1	2
K09015	sufD; Fe-S cluster assembly protein SufD	1	1	1	1	1	1	2
K09017	rutR; TetR/AcrR family transcriptional regulator	2	2	2	2	2	0	2
K09020	rutB; ureidoacrylate peracid hydrolase [EC:3.5.1.110]	0	0	0	0	0	2	1
K09022	ridA, tdcF, RIDA; 2-iminobutanoate/2-iminopropanoate deaminase [EC:3.5.99.10]	1	1	1	0	2	1	1
K09117	K09117; uncharacterized protein	1	1	2	0	1	0	0
K09118	K09118; uncharacterized protein	0	0	0	1	2	0	1
K09121	larC; pyridinium-3,5-bisthiocarboxylic acid mononucleotide nickel chelatase [EC:4.99.1.12]	1	1	1	1	1	1	1
K09125	yhhQ; queuosine precursor transporter	0	1	0	0	1	0	0
K09131	K09131; uncharacterized protein	1	0	0	1	0	0	0
K09137	K09137; uncharacterized protein	0	0	0	1	0	0	0
K09141	K09141; uncharacterized protein	0	0	0	1	0	0	0
K09153	K09153; small membrane protein	0	0	0	1	0	1	1
K09165	K09165; dodecin	0	0	0	0	1	0	1
K09166	K09166; uncharacterized protein	2	1	0	0	0	1	1
K09167	K09167; uncharacterized protein	1	1	0	0	0	0	1
K09384	K09384; uncharacterized protein	1	0	0	0	0	0	0
K09386	K09386; uncharacterized protein	1	1	0	1	1	0	1
K09456	aidB; putative acyl-CoA dehydrogenase	0	1	1	0	0	1	1
K09457	queF; 7-cyano-7-deazaguanine reductase [EC:1.7.1.13]	1	0	1	1	0	1	1
K09458	fabF, OXSM, CEM1; 3-oxoacyl-[acyl-carrier-protein] synthase II [EC:2.3.1.179]	1	2	3	1	1	0	1
K09516	RETSAT; all-trans-retinol 13,14-reductase [EC:1.3.99.23]	0	0	0	1	0	0	0
K09607	ina; immune inhibitor A [EC:3.4.24.-]	0	0	1	0	0	0	0
K09684	pucR; PucR family transcriptional regulator, purine catabolism regulatory protein	1	0	0	0	0	0	0
K09690	ABC-2.LPSE.P; lipopolysaccharide transport system permease protein	1	0	0	0	0	0	0
K09691	ABC-2.LPSE.A; lipopolysaccharide transport system ATP-binding protein	1	0	0	0	0	0	0
K09694	nodJ; lipooligosaccharide transport system permease protein	0	0	0	0	1	0	0
K09695	nodI; lipooligosaccharide transport system ATP-binding protein	0	0	0	0	1	0	0
K09700	K09700; uncharacterized protein	0	1	0	1	1	1	1
K09701	K09701; uncharacterized protein	0	1	1	0	1	0	0
K09705	K09705; uncharacterized protein	1	2	1	0	0	0	0
K09710	ybeB; ribosome-associated protein	1	1	1	1	1	1	1
K09747	ebfC; nucleoid-associated protein EbfC	1	1	1	1	1	1	1
K09748	rimP; ribosome maturation factor RimP	1	1	1	1	1	1	1
K09755	CYP84A, F5H; ferulate-5-hydroxylase [EC:1.14.-.-]	1	0	0	0	0	0	0
K09760	rmuC; DNA recombination protein RmuC	1	0	0	0	0	1	1
K09761	rsmE; 16S rRNA (uracil1498-N3)-methyltransferase [EC:2.1.1.193]	1	1	1	1	1	1	1
K09764	K09764; uncharacterized protein	1	1	1	1	0	0	1
K09767	yajQ; cyclic-di-GMP-binding protein	1	1	1	1	1	1	1
K09771	TC.SMR3; small multidrug resistance family-3 protein	0	0	0	0	1	1	0
K09772	sepF; cell division inhibitor SepF	1	1	1	1	1	1	1
K09780	K09780; uncharacterized protein	0	0	0	0	0	1	0
K09781	K09781; uncharacterized protein	0	1	1	0	1	0	0
K09790	K09790; uncharacterized protein	0	1	0	0	1	0	0
K09791	K09791; uncharacterized protein	1	1	1	1	1	0	1
K09795	K09795; uncharacterized protein	0	1	1	0	0	1	0
K09796	pccA; periplasmic copper chaperone A	0	1	1	1	2	0	4
K09811	ftsX; cell division transport system permease protein	1	1	1	1	1	1	1
K09812	ftsE; cell division transport system ATP-binding protein	1	1	1	1	1	1	1
K09815	znuA; zinc transport system substrate-binding protein	0	0	1	0	0	0	0
K09816	znuB; zinc transport system permease protein	0	0	1	1	0	0	0
K09817	znuC; zinc transport system ATP-binding protein [EC:7.2.2.20]	0	0	1	1	0	0	0
K09822	K09822; uncharacterized protein	0	0	0	0	0	1	1
K09858	K09858; SEC-C motif domain protein	1	0	0	0	0	1	0
K09861	K09861; uncharacterized protein	1	0	0	0	0	1	0
K09903	pyrH; uridylate kinase [EC:2.7.4.22]	1	1	1	1	1	1	1
K09915	K09915; uncharacterized protein	1	1	1	1	1	1	0
K09925	K09925; uncharacterized protein	0	1	0	0	0	0	0
K09927	K09927; uncharacterized protein	1	1	1	0	1	0	1
K09931	K09931; uncharacterized protein	0	0	0	0	0	1	0
K09932	K09932; uncharacterized protein	0	0	0	0	1	0	0
K09933	mtfA; MtfA peptidase	1	1	2	0	0	1	1
K09940	K09940; uncharacterized protein	1	0	0	1	0	1	0
K09951	cas2; CRISPR-associated protein Cas2	0	0	0	2	0	0	0
K09964	K09964; uncharacterized protein	1	0	0	0	0	1	0
K09966	K09966; uncharacterized protein	1	1	1	0	1	1	0
K09967	K09967; uncharacterized protein	0	0	0	0	0	2	0
K09970	aapQ, bztB; general L-amino acid transport system permease protein	0	0	0	0	1	0	0
K09971	aapM, bztC; general L-amino acid transport system permease protein	0	0	0	0	1	0	0
K09981	K09981; uncharacterized protein	0	1	1	1	1	0	0
K09984	K09984; uncharacterized protein	1	0	0	0	0	0	0
K09992	K09992; uncharacterized protein	1	0	1	0	0	0	0
K10005	gluB; glutamate transport system substrate-binding protein	1	0	0	0	0	0	0
K10006	gluC; glutamate transport system permease protein	1	0	0	0	0	0	0
K10007	gluD; glutamate transport system permease protein	1	0	0	0	0	0	0
K10026	queE; 7-carboxy-7-deazaguanine synthase [EC:4.3.99.3]	1	0	1	1	0	0	1
K10027	crtI; phytoene desaturase [EC:1.3.99.26 1.3.99.28 1.3.99.29 1.3.99.31]	1	0	0	1	0	1	1
K10112	msmX, msmK, malK, sugC, ggtA, msiK; multiple sugar transport system ATP-binding protein	1	2	1	1	1	2	2
K10215	ethA; monooxygenase [EC:1.14.13.-]	1	2	0	0	0	1	0
K10231	kojP; kojibiose phosphorylase [EC:2.4.1.230]	0	0	0	1	0	0	0
K10232	aglE, ggtB; alpha-glucoside transport system substrate-binding protein	0	0	0	0	1	0	0
K10233	aglF, ggtC; alpha-glucoside transport system permease protein	0	0	0	0	1	0	0
K10234	aglG, ggtD; alpha-glucoside transport system permease protein	0	0	0	0	1	0	0
K10255	FAD6, desA; acyl-lipid omega-6 desaturase (Delta-12 desaturase) [EC:1.14.19.23 1.14.19.45]	0	0	0	1	0	0	1
K10439	rbsB; ribose transport system substrate-binding protein	0	0	0	0	0	0	2
K10440	rbsC; ribose transport system permease protein	0	0	0	0	0	0	1
K10441	rbsA; ribose transport system ATP-binding protein [EC:7.5.2.7]	0	0	0	0	0	0	1
K10532	HGSNAT; heparan-alpha-glucosaminide N-acetyltransferase [EC:2.3.1.78]	0	0	0	0	0	1	0
K10533	E3.3.2.8; limonene-1,2-epoxide hydrolase [EC:3.3.2.8]	2	1	1	1	0	1	1
K10536	aguA; agmatine deiminase [EC:3.5.3.12]	0	0	1	0	0	1	0
K10543	xylF; D-xylose transport system substrate-binding protein	0	0	0	0	0	1	0
K10545	xylG; D-xylose transport system ATP-binding protein [EC:7.5.2.10]	0	0	0	0	0	2	0
K10563	mutM, fpg; formamidopyrimidine-DNA glycosylase [EC:3.2.2.23 4.2.99.18]	4	3	3	2	4	4	3
K10672	grdB; glycine reductase complex component B subunit gamma [EC:1.21.4.2]	2	0	0	0	0	0	2
K10674	ectD; ectoine hydroxylase [EC:1.14.11.55]	1	1	0	0	1	0	1
K10716	kch, trkA, mthK, pch; voltage-gated potassium channel	2	2	2	0	0	2	4
K10747	LIG1; DNA ligase 1 [EC:6.5.1.1 6.5.1.6 6.5.1.7]	1	1	2	0	0	1	0
K10773	NTH; endonuclease III [EC:4.2.99.18]	1	1	1	1	1	2	1
K10805	tesB; acyl-CoA thioesterase II [EC:3.1.2.-]	2	2	2	3	4	2	2
K10831	tauB; taurine transport system ATP-binding protein [EC:7.6.2.7]	0	0	0	0	0	1	0
K10914	crp; CRP/FNR family transcriptional regulator, cyclic AMP receptor protein	2	1	2	3	3	3	2
K10979	ku; DNA end-binding protein Ku	1	1	2	1	2	2	1
K11065	tpx; thioredoxin-dependent peroxiredoxin [EC:1.11.1.24]	1	0	0	0	0	0	0
K11068	hlyIII; hemolysin III	1	1	1	0	1	1	0
K11069	potD; spermidine/putrescine transport system substrate-binding protein	0	0	1	0	0	1	0
K11070	potC; spermidine/putrescine transport system permease protein	0	0	1	0	0	1	0
K11071	potB; spermidine/putrescine transport system permease protein	0	0	0	0	0	1	0
K11105	cvrA, nhaP2; potassium/hydrogen antiporter	1	1	0	1	1	0	1
K11159	K11159; carotenoid cleavage oxygenase [EC:1.13.11.-]	2	4	3	1	1	2	1
K11175	purN; phosphoribosylglycinamide formyltransferase 1 [EC:2.1.2.2]	1	1	1	1	1	1	1
K11179	tusE, dsrC; tRNA 2-thiouridine synthesizing protein E [EC:2.8.1.-]	0	0	0	1	0	0	1
K11206	NIT1, ybeM; deaminated glutathione amidase [EC:3.5.1.128]	0	0	0	1	0	0	1
K11212	cofD; LPPG:FO 2-phospho-L-lactate transferase [EC:2.7.8.28]	1	1	1	1	1	1	1
K11263	bccA, pccA; acetyl-CoA/propionyl-CoA carboxylase, biotin carboxylase, biotin carboxyl carrier protein [EC:6.4.1.2 6.4.1.3 6.3.4.14]	1	1	1	1	1	1	1
K11312	K11312; cupin 2 domain-containing protein	0	0	0	0	1	0	1
K11381	bkdA; 2-oxoisovalerate dehydrogenase E1 component [EC:1.2.4.4]	1	1	1	0	0	1	0
K11434	PRMT1; type I protein arginine methyltransferase [EC:2.1.1.319]	1	0	0	0	0	0	0
K11438	PRMT7; type III protein arginine methyltransferase [EC:2.1.1.321]	0	0	0	0	0	0	1
K11529	gck, gckA, GLYCTK; glycerate 2-kinase [EC:2.7.1.165]	1	0	0	0	0	0	0
K11533	fas; fatty acid synthase, bacteria type [EC:2.3.1.-]	0	0	0	0	0	1	0
K11603	mntA; manganese transport system ATP-binding protein [EC:7.2.2.5]	0	0	0	0	1	0	0
K11645	fbaB; fructose-bisphosphate aldolase, class I [EC:4.1.2.13]	0	0	0	1	0	0	0
K11717	sufS; cysteine desulfurase / selenocysteine lyase [EC:2.8.1.7 4.4.1.16]	1	1	1	1	1	1	1
K11731	atuD; citronellyl-CoA dehydrogenase [EC:1.3.99.-]	0	0	0	1	0	1	0
K11741	sugE; quaternary ammonium compound-resistance protein SugE	1	1	1	0	1	0	1
K11749	rseP; regulator of sigma E protease [EC:3.4.24.-]	1	1	1	1	1	2	1
K11752	ribD; diaminohydroxyphosphoribosylaminopyrimidine deaminase / 5-amino-6-(5-phosphoribosylamino)uracil reductase [EC:3.5.4.26 1.1.1.193]	1	1	1	1	1	1	1
K11753	ribF; riboflavin kinase / FMN adenylyltransferase [EC:2.7.1.26 2.7.7.2]	1	1	1	1	1	1	1
K11754	folC; dihydrofolate synthase / folylpolyglutamate synthase [EC:6.3.2.12 6.3.2.17]	1	1	1	1	1	1	1
K11755	hisIE; phosphoribosyl-AMP cyclohydrolase / phosphoribosyl-ATP pyrophosphohydrolase [EC:3.5.4.19 3.6.1.31]	1	0	0	0	1	0	1
K11779	fbiC; FO synthase [EC:2.5.1.147 4.3.1.32]	1	1	1	1	1	1	1
K11936	pgaC, icaA; poly-beta-1,6-N-acetyl-D-glucosamine synthase [EC:2.4.1.-]	0	1	0	0	0	0	0
K11939	rhtA; inner membrane transporter RhtA	0	0	1	0	0	1	0
K11959	urtA; urea transport system substrate-binding protein	1	0	0	0	0	1	0
K11960	urtB; urea transport system permease protein	1	0	0	0	0	1	0
K11962	urtD; urea transport system ATP-binding protein	1	0	0	0	0	1	0
K11963	urtE; urea transport system ATP-binding protein	1	0	0	0	0	1	0
K11991	tadA; tRNA(adenine34) deaminase [EC:3.5.4.33]	1	0	1	1	0	0	0
K12132	prkC, stkP; eukaryotic-like serine/threonine-protein kinase [EC:2.7.11.1]	5	3	3	3	6	1	4
K12234	cofE, fbiB; coenzyme F420-0:L-glutamate ligase / coenzyme F420-1:gamma-L-glutamate ligase [EC:6.3.2.31 6.3.2.34]	1	1	0	1	1	1	1
K12251	aguB; N-carbamoylputrescine amidase [EC:3.5.1.53]	0	0	1	0	0	1	0
K12262	cybB; superoxide oxidase [EC:1.10.3.17]	0	0	1	0	0	0	0
K12263	cccB; cytochrome c551	0	0	0	1	0	0	0
K12297	rlmL, rlmK; 23S rRNA (guanine2445-N2)-methyltransferase / 23S rRNA (guanine2069-N7)-methyltransferase [EC:2.1.1.173 2.1.1.264]	1	0	0	0	0	0	0
K12410	npdA; NAD-dependent deacetylase [EC:2.3.1.286]	1	1	1	1	1	1	1
K12429	fadD36; fatty acid CoA ligase FadD36	0	0	1	0	1	0	0
K12452	ascC, ddhC, rfbH; CDP-4-dehydro-6-deoxyglucose reductase, E1 [EC:1.17.1.1]	0	0	0	0	0	2	2
K12454	rfbE; CDP-paratose 2-epimerase [EC:5.1.3.10]	1	1	0	0	1	0	0
K12507	fadK; acyl-CoA synthetase [EC:6.2.1.-]	0	1	0	0	0	0	1
K12510	tadB; tight adherence protein B	6	2	1	3	4	3	3
K12511	tadC; tight adherence protein C	5	3	1	2	2	2	2
K12573	rnr, vacB; ribonuclease R [EC:3.1.13.1]	1	0	1	0	1	1	0
K12574	rnj; ribonuclease J [EC:3.1.-.-]	1	1	1	1	1	1	1
K12663	ECH1; Delta3,5-Delta2,4-dienoyl-CoA isomerase [EC:5.3.3.21]	0	0	0	1	0	0	0
K12675	cs; clavaminate synthase [EC:1.14.11.21]	0	0	0	0	0	1	0
K12952	ctpE; cation-transporting P-type ATPase E [EC:7.2.2.-]	0	0	1	1	1	1	1
K12960	mtaD; 5-methylthioadenosine/S-adenosylhomocysteine deaminase [EC:3.5.4.31 3.5.4.28]	0	0	0	1	0	0	1
K12979	lpxO; beta-hydroxylase [EC:1.14.11.-]	0	3	0	0	0	0	0
K12994	wbdB, wbpY, mtfB; mannosyl-N-acetyl-alpha-D-glucosaminyl-diphospho-ditrans,octacis-undecaprenol 3-alpha-mannosyltransferase / alpha-1,3-rhamnosyltransferase [EC:2.4.1.349 2.4.1.-]	1	0	0	0	0	1	0
K12996	rgpA; rhamnosyltransferase [EC:2.4.1.-]	0	0	0	0	0	1	0
K13006	wbqR; UDP-perosamine 4-acetyltransferase [EC:2.3.1.-]	0	0	1	0	0	0	0
K13010	per, rfbE; perosamine synthetase [EC:2.6.1.102]	1	0	1	0	0	1	2
K13012	wbqP; O-antigen biosynthesis protein WbqP	1	0	0	0	0	0	0
K13038	coaBC, dfp; phosphopantothenoylcysteine decarboxylase / phosphopantothenate---cysteine ligase [EC:4.1.1.36 6.3.2.5]	1	1	1	1	1	1	1
K13075	ahlD, aiiA, attM, blcC; N-acyl homoserine lactone hydrolase [EC:3.1.1.81]	1	0	0	0	0	2	0
K13274	wprA; cell wall-associated protease [EC:3.4.21.-]	1	0	0	0	0	0	0
K13277	epr; minor extracellular protease Epr [EC:3.4.21.-]	1	0	0	0	0	0	0
K13282	cphB; cyanophycinase [EC:3.4.15.6]	0	1	1	1	1	1	1
K13288	orn, REX2, REXO2; oligoribonuclease [EC:3.1.-.-]	1	1	1	1	1	1	1
K13327	spnN, oleW; dTDP-3,4-didehydro-2,6-dideoxy-alpha-D-glucose 3-reductase [EC:1.1.1.384]	0	0	1	0	0	0	0
K13481	xdhA; xanthine dehydrogenase small subunit [EC:1.17.1.4]	0	1	0	0	0	0	0
K13507	GAT; glycerol-3-phosphate O-acyltransferase / dihydroxyacetone phosphate acyltransferase [EC:2.3.1.15 2.3.1.42]	0	0	0	0	0	0	1
K13527	mpa; proteasome-associated ATPase	1	1	1	1	1	1	1
K13529	ada-alkA; AraC family transcriptional regulator, regulatory protein of adaptative response / DNA-3-methyladenine glycosylase II [EC:3.2.2.21]	1	1	1	0	0	1	0
K13542	cobA-hemD; uroporphyrinogen III methyltransferase / synthase [EC:2.1.1.107 4.2.1.75]	1	1	1	1	0	1	1
K13570	pup; prokaryotic ubiquitin-like protein Pup	1	1	1	1	1	1	1
K13571	pafA; proteasome accessory factor A [EC:6.3.1.19]	1	1	1	1	1	1	1
K13572	pafB; proteasome accessory factor B	2	1	1	1	2	2	1
K13573	pafC; proteasome accessory factor C	0	1	1	1	1	0	1
K13607	fldA; cinnamoyl-CoA:phenyllactate CoA-transferase [EC:2.8.3.17]	0	0	0	1	0	0	0
K13626	fliW; flagellar assembly factor FliW	0	0	0	0	1	1	0
K13628	iscA; iron-sulfur cluster assembly protein	1	1	1	1	1	1	2
K13633	ftrA; AraC family transcriptional regulator, transcriptional activator FtrA	0	0	0	0	1	0	0
K13638	zntR; MerR family transcriptional regulator, Zn(II)-responsive regulator of zntA	0	1	0	0	0	0	0
K13639	soxR; MerR family transcriptional regulator, redox-sensitive transcriptional activator SoxR	1	0	0	0	1	1	0
K13640	hspR; MerR family transcriptional regulator, heat shock protein HspR	1	1	1	1	1	1	1
K13641	iclR; IclR family transcriptional regulator, acetate operon repressor	0	0	0	0	0	0	1
K13643	iscR; Rrf2 family transcriptional regulator, iron-sulfur cluster assembly transcription factor	1	1	0	1	0	2	2
K13668	pimB; phosphatidyl-myo-inositol dimannoside synthase [EC:2.4.1.346]	1	1	1	1	1	1	1
K13671	K13671; alpha-1,2-mannosyltransferase [EC:2.4.1.-]	0	0	0	1	0	0	0
K13687	aftB; arabinofuranosyltransferase [EC:2.4.2.-]	1	2	1	0	0	1	0
K13693	gpgS; glucosyl-3-phosphoglycerate synthase [EC:2.4.1.266]	1	1	1	1	1	1	1
K13787	idsA; geranylgeranyl diphosphate synthase, type I [EC:2.5.1.1 2.5.1.10 2.5.1.29]	1	0	1	2	1	1	2
K13821	putA; RHH-type transcriptional regulator, proline utilization regulon repressor / proline dehydrogenase / delta 1-pyrroline-5-carboxylate dehydrogenase [EC:1.5.5.2 1.2.1.88]	1	1	0	0	0	0	0
K13874	araB; L-arabinonolactonase [EC:3.1.1.15]	0	1	1	0	1	0	0
K13953	adhP; alcohol dehydrogenase, propanol-preferring [EC:1.1.1.1]	0	2	1	2	1	0	3
K13963	SERPINB; serpin B	0	0	1	1	1	0	0
K13993	HSP20; HSP20 family protein	1	1	1	2	1	1	0
K14136	K14136; decaprenyl-phosphate phosphoribosyltransferase [EC:2.4.2.45]	1	1	1	1	0	1	1
K14161	imuB; protein ImuB	1	1	1	1	1	1	1
K14162	dnaE2; error-prone DNA polymerase [EC:2.7.7.7]	1	1	1	1	1	1	1
K14166	ycnJ; copper transport protein	0	1	2	0	1	0	1
K14267	dapC; N-succinyldiaminopimelate aminotransferase [EC:2.6.1.17]	0	1	0	0	0	0	0
K14274	xylC; xylono-1,5-lactonase [EC:3.1.1.110]	0	0	0	0	0	1	0
K14337	mptA; alpha-1,6-mannosyltransferase [EC:2.4.1.-]	0	0	0	1	0	0	1
K14340	K14340; mannosyltransferase [EC:2.4.1.-]	0	1	0	0	0	0	0
K14358	SCRN; secernin	0	0	0	1	0	0	1
K14415	RTCB, rtcB; tRNA-splicing ligase RtcB (3'-phosphate/5'-hydroxy nucleic acid ligase) [EC:6.5.1.8]	0	0	0	1	0	2	0
K14441	rimO; ribosomal protein S12 methylthiotransferase [EC:2.8.4.4]	1	1	1	1	1	1	1
K14447	ecm; ethylmalonyl-CoA mutase [EC:5.4.99.63]	1	0	1	1	1	1	1
K14449	mch, mcd; 2-methylfumaryl-CoA hydratase [EC:4.2.1.148]	1	0	0	0	1	0	0
K14475	ICP; inhibitor of cysteine peptidase	1	0	0	0	0	0	0
K14520	hapE; 4-hydroxyacetophenone monooxygenase [EC:1.14.13.84]	1	1	1	0	1	1	2
K14627	actVI3; dehydratase [EC:4.2.1.-]	0	0	0	0	0	1	0
K14633	gra6, RED2; ketoreductase RED2 [EC:1.1.1.-]	0	1	0	1	0	0	0
K14645	K14645; serine protease [EC:3.4.21.-]	1	1	0	0	0	0	0
K14652	ribBA; 3,4-dihydroxy 2-butanone 4-phosphate synthase / GTP cyclohydrolase II [EC:4.1.99.12 3.5.4.25]	1	1	1	1	1	1	1
K14659	nodB; chitooligosaccharide deacetylase [EC:3.5.1.-]	0	0	1	0	0	0	0
K14731	mlhB, chnC; epsilon-lactone hydrolase [EC:3.1.1.83]	0	3	1	0	1	2	1
K14733	limB; limonene 1,2-monooxygenase [EC:1.14.13.107]	1	0	0	1	0	1	0
K14743	mycP; membrane-anchored mycosin MYCP [EC:3.4.21.-]	2	1	0	0	1	0	0
K14761	ybcJ; ribosome-associated protein	0	0	1	0	0	0	1
K14938	NVD, DAF36; cholesterol 7-desaturase [EC:1.14.19.21]	0	0	0	0	0	2	0
K14941	cofC, fbiD; 2-phospho-L-lactate/phosphoenolpyruvate guanylyltransferase [EC:2.7.7.68 2.7.7.105]	1	1	1	1	1	1	1
K14952	namH; UDP-MurNAc hydroxylase	0	1	0	0	0	0	0
K14998	SURF1, SHY1; surfeit locus 1 family protein	0	0	0	0	0	1	1
K15034	yaeJ; ribosome-associated protein	0	0	0	0	1	1	0
K15269	pecM; probable blue pigment (indigoidine) exporter	1	0	1	0	0	0	0
K15342	cas1; CRISP-associated protein Cas1	0	0	0	3	0	0	0
K15357	nicD; N-formylmaleamate deformylase [EC:3.5.1.106]	0	0	0	0	0	1	0
K15371	GDH2; glutamate dehydrogenase [EC:1.4.1.2]	0	1	0	0	0	0	0
K15372	toa; taurine---2-oxoglutarate transaminase [EC:2.6.1.55]	0	0	1	0	0	1	0
K15520	mshD; mycothiol synthase [EC:2.3.1.189]	1	1	1	1	1	1	1
K15521	mshA; D-inositol-3-phosphate glycosyltransferase [EC:2.4.1.250]	1	1	1	1	1	1	1
K15531	rexA; oligosaccharide reducing-end xylanase [EC:3.2.1.156]	0	0	1	0	0	0	0
K15551	tauA; taurine transport system substrate-binding protein	0	0	0	0	0	1	0
K15552	tauC; taurine transport system permease protein	0	0	0	0	0	1	0
K15553	ssuA; sulfonate transport system substrate-binding protein	0	0	0	0	0	1	0
K15554	ssuC; sulfonate transport system permease protein	0	0	0	0	0	1	0
K15555	ssuB; sulfonate transport system ATP-binding protein [EC:7.6.2.14]	0	0	0	0	0	1	0
K15583	oppD; oligopeptide transport system ATP-binding protein	1	0	0	0	0	0	0
K15634	gpmB; 2,3-bisphosphoglycerate-dependent phosphoglycerate mutase [EC:5.4.2.11]	2	2	0	1	2	2	1
K15635	apgM; 2,3-bisphosphoglycerate-independent phosphoglycerate mutase [EC:5.4.2.12]	0	1	0	1	0	1	1
K15640	K15640, phoE; uncharacterized phosphatase	1	1	1	1	0	1	1
K15736	lhgO; (S)-2-hydroxyglutarate dehydrogenase [EC:1.1.5.13]	0	0	0	1	1	1	1
K15738	uup; ABC transport system ATP-binding/permease protein	1	1	1	0	1	1	1
K15739	vanB, vanA, vanD; D-alanine---(R)-lactate ligase [EC:6.1.2.1]	0	0	0	0	0	1	0
K15746	crtZ; beta-carotene 3-hydroxylase [EC:1.14.15.24]	1	0	0	1	0	1	1
K15773	hipB; HTH-type transcriptional regulator / antitoxin HipB	1	1	0	0	1	0	0
K15777	DOPA; 4,5-DOPA dioxygenase extradiol [EC:1.13.11.-]	0	1	1	0	1	1	0
K15781	serB-plsC; putative phosphoserine phosphatase / 1-acylglycerol-3-phosphate O-acyltransferase [EC:3.1.3.3 2.3.1.51]	1	0	0	0	0	0	0
K15856	rmd; GDP-4-dehydro-6-deoxy-D-mannose reductase [EC:1.1.1.281]	1	1	1	1	1	1	1
K15866	paaG; 2-(1,2-epoxy-1,2-dihydrophenyl)acetyl-CoA isomerase [EC:5.3.3.18]	2	2	1	3	1	1	2
K15868	baiB; bile acid-coenzyme A ligase [EC:6.2.1.7]	1	0	0	0	1	0	0
K15894	pseB, wbjB; UDP-N-acetylglucosamine 4,6-dehydratase/5-epimerase [EC:4.2.1.115 5.1.3.-]	0	0	0	0	0	0	1
K15942	snoaC, dnrC, dauC, aknG; O-methyltransferase / aklanonic acid methyltransferase [EC:2.1.1.- 2.1.1.288]	0	2	0	1	1	0	0
K15977	K15977; putative oxidoreductase	1	2	0	1	2	1	1
K15981	CYP125A; cholest-4-en-3-one 26-monooxygenase [EC:1.14.15.29]	1	2	1	0	0	1	0
K15982	kshA; 3-ketosteroid 9alpha-monooxygenase subunit A [EC:1.14.15.30]	0	0	0	1	0	0	0
K15987	hppA; K(+)-stimulated pyrophosphate-energized sodium pump	1	1	1	1	1	1	1
K16013	cydD; ATP-binding cassette, subfamily C, bacterial CydD	0	1	1	0	0	1	0
K16020	rifG, asm47; 5-deoxy-5-amino-3-dehydroquinate synthase	1	0	0	0	1	0	0
K16022	rif19; flavoprotein hydroxylase	0	2	0	0	0	0	0
K16039	asm25; N-glycosyltransferase [EC:2.4.1.-]	0	0	0	0	1	0	0
K16045	hsd; 3beta-hydroxy-Delta5-steroid dehydrogenase / steroid Delta-isomerase [EC:1.1.1.145 5.3.3.1]	0	0	0	0	0	0	1
K16046	CYP142; cholest-4-en-3-one 26-monooxygenase [EC:1.14.15.28]	3	3	1	2	0	3	2
K16048	hsaB; 3-hydroxy-9,10-secoandrosta-1,3,5(10)-triene-9,17-dione monooxygenase reductase component [EC:1.5.1.-]	0	0	1	0	0	1	0
K16049	hsaC; 3,4-dihydroxy-9,10-secoandrosta-1,3,5(10)-triene-9,17-dione 4,5-dioxygenase [EC:1.13.11.25]	0	0	0	0	0	1	1
K16052	ynaI, mscMJ; MscS family membrane protein	0	1	0	0	0	0	1
K16066	ydfG; 3-hydroxy acid dehydrogenase / malonic semialdehyde reductase [EC:1.1.1.381 1.1.1.-]	1	0	0	1	0	0	0
K16137	nemR; TetR/AcrR family transcriptional regulator, transcriptional repressor for nem operon	1	0	0	0	0	0	0
K16146	pep2; maltokinase [EC:2.7.1.175]	0	0	0	0	0	1	0
K16147	glgE; starch synthase (maltosyl-transferring) [EC:2.4.99.16]	0	1	1	1	1	1	1
K16148	glgM; alpha-maltose-1-phosphate synthase [EC:2.4.1.342]	0	0	0	0	1	0	0
K16167	bpsA, srsA, pks11, pks10; alkylresorcinol/alkylpyrone synthase	0	0	0	1	0	0	1
K16171	faaH; fumarylacetoacetate (FAA) hydrolase [EC:3.7.1.2]	0	1	0	0	0	0	0
K16264	czcD, zitB; cobalt-zinc-cadmium efflux system protein	1	2	1	1	2	2	1
K16267	zipB; zinc and cadmium transporter	0	0	0	0	0	0	1
K16301	efeB; deferrochelatase/peroxidase EfeB [EC:1.11.1.-]	0	1	0	0	0	1	1
K16328	psuK; pseudouridine kinase [EC:2.7.1.83]	0	0	0	1	1	0	0
K16329	psuG; pseudouridylate synthase [EC:4.2.1.70]	0	1	1	0	1	0	0
K16444	gtfB, gtfE; vancomycin aglycone glucosyltransferase [EC:2.4.1.310]	0	0	0	0	2	0	0
K16593	bioI, CYP107H; pimeloyl-[acyl-carrier protein] synthase [EC:1.14.14.46]	1	0	0	0	0	0	0
K16652	dprE2; decaprenylphospho-beta-D-erythro-pentofuranosid-2-ulose 2-reductase [EC:1.1.1.333]	0	1	1	1	0	2	1
K16653	dprE1; decaprenylphospho-beta-D-ribofuranose 2-oxidase [EC:1.1.98.3]	0	1	1	1	0	1	1
K16692	etk-wzc; tyrosine-protein kinase Etk/Wzc [EC:2.7.10.-]	0	1	0	0	0	0	0
K16703	wcaL, amsK; colanic acid/amylovoran biosynthesis glycosyltransferase [EC:2.4.-.-]	0	0	1	0	0	0	0
K16785	ecfT; energy-coupling factor transport system permease protein	0	0	0	1	0	1	1
K16786	ecfA1; energy-coupling factor transport system ATP-binding protein [EC:7.-.-.-]	0	1	0	1	0	1	1
K16881	K16881; mannose-1-phosphate guanylyltransferase / phosphomannomutase [EC:2.7.7.13 5.4.2.8]	0	1	1	1	0	1	1
K16927	cbrT; energy-coupling factor transport system substrate-specific component	0	1	0	1	0	1	1
K16937	doxD; thiosulfate dehydrogenase (quinone) large subunit [EC:1.8.5.2]	0	0	0	0	3	0	1
K16950	asrA; anaerobic sulfite reductase subunit A	0	0	0	1	0	0	0
K17103	CHO1, pssA; CDP-diacylglycerol---serine O-phosphatidyltransferase [EC:2.7.8.8]	0	0	1	0	0	0	0
K17218	sqr; sulfide:quinone oxidoreductase [EC:1.8.5.4]	0	1	1	3	0	1	1
K17247	msrQ; methionine sulfoxide reductase heme-binding subunit	0	0	0	0	1	0	0
K17414	MRPS36; small subunit ribosomal protein S36	0	0	1	0	0	0	0
K17686	copA, ctpA, ATP7; P-type Cu+ transporter [EC:7.2.2.8]	1	2	4	1	1	1	1
K17734	aprX; serine protease AprX [EC:3.4.21.-]	1	0	0	0	0	0	0
K17752	rsbT; serine/threonine-protein kinase RsbT [EC:2.7.11.1]	1	0	0	0	0	0	0
K17758	nnrD; ADP-dependent NAD(P)H-hydrate dehydratase [EC:4.2.1.136]	1	1	2	1	1	1	1
K17828	pyrDI; dihydroorotate dehydrogenase (NAD+) catalytic subunit [EC:1.3.1.14]	1	1	1	1	1	1	1
K17829	ccrA; crotonyl-CoA reductase [EC:1.3.1.86]	0	1	1	1	1	1	1
K17840	aac2-I; aminoglycoside 2'-N-acetyltransferase I [EC:2.3.1.59]	0	0	1	0	0	0	0
K17883	mtr; mycothione reductase [EC:1.8.1.15]	1	0	0	0	0	1	0
K17947	wbiB; dTDP-L-rhamnose 4-epimerase [EC:5.1.3.25]	1	1	0	0	0	1	0
K18007	hoxY; NAD-reducing hydrogenase small subunit [EC:1.12.1.2]	0	0	0	1	0	0	0
K18013	kce; 3-keto-5-aminohexanoate cleavage enzyme [EC:2.3.1.247]	0	0	0	0	0	0	1
K18053	luci; renilla-luciferin 2-monooxygenase [EC:1.13.12.5]	1	0	0	0	0	0	0
K18229	PAMO; phenylacetone monooxygenase [EC:1.14.13.92]	2	0	0	0	0	0	0
K18230	tylC, oleB, carA, srmB; macrolide transport system ATP-binding/permease protein	0	0	0	0	1	0	0
K18288	ict-Y; itaconate CoA-transferase [EC:2.8.3.-]	0	0	0	0	1	0	0
K18334	fucD; L-fuconate dehydratase [EC:4.2.1.68]	1	0	0	0	0	0	0
K18350	vanSC, vanSE, vanSG; two-component system, OmpR family, sensor histidine kinase VanS [EC:2.7.13.3]	1	1	0	0	0	0	0
K18351	vanSAc; two-component system, OmpR family, sensor histidine kinase VanS [EC:2.7.13.3]	0	0	0	0	0	1	0
K18352	vanRAc; two-component system, OmpR family, response regulator VanR	0	0	0	0	0	1	0
K18369	adh2; alcohol dehydrogenase [EC:1.1.1.-]	0	0	0	0	2	0	0
K18371	acmA; acetone monooxygenase (methyl acetate-forming) [EC:1.14.13.226]	0	0	0	0	0	1	0
K18372	acmB; methyl acetate hydrolase [EC:3.1.1.114]	0	0	0	0	0	0	1
K18399	BPHL; valacyclovir hydrolase [EC:3.1.-.-]	0	0	1	0	0	0	0
K18455	mca; mycothiol S-conjugate amidase [EC:3.5.1.115]	1	1	1	1	1	1	1
K18456	E3.5.4.32; 8-oxoguanine deaminase [EC:3.5.4.32]	0	1	0	0	0	1	0
K18562	thnQ, cmmQ; 2-oxoglutarate-dependent dioxygenase [EC:1.14.20.-]	1	0	0	0	0	0	0
K18570	cmm17; putative hydratase	0	0	0	0	0	0	1
K18661	matB; malonyl-CoA/methylmalonyl-CoA synthetase [EC:6.2.1.-]	0	0	0	0	0	1	0
K18672	dacA; diadenylate cyclase [EC:2.7.7.85]	1	2	0	0	0	1	0
K18687	fadD3; HIP---CoA ligase [EC:6.2.1.41]	0	1	1	1	0	2	0
K18688	fadD19; 3-oxocholest-4-en-26-oate---CoA ligase [EC:6.2.1.42]	2	4	1	1	5	3	1
K18697	pgpC; phosphatidylglycerophosphatase C [EC:3.1.3.27]	0	0	1	0	0	0	0
K18827	wbdD, wbbD; O-antigen chain-terminating methyltransferase [EC:2.1.1.- 2.1.1.294 2.7.1.181]	0	0	0	0	0	1	0
K18833	cmr; MFS transporter, DHA3 family, multidrug efflux protein	0	0	1	0	0	0	0
K18911	egtD; L-histidine Nalpha-methyltransferase [EC:2.1.1.44]	1	1	1	1	0	1	0
K18912	egtB; gamma-glutamyl hercynylcysteine S-oxide synthase [EC:1.14.99.50]	0	1	0	1	0	0	0
K18917	mrx1; mycoredoxin [EC:1.20.4.3]	0	0	0	0	0	1	0
K18939	lmrA, yxaF; TetR/AcrR family transcriptional regulator, lmrAB and yxaGH operons repressor	0	0	0	0	0	1	0
K18955	whiB1_2_3_4; WhiB family transcriptional regulator, redox-sensing transcriptional regulator	5	6	5	6	6	4	6
K18958	whiB7; WhiB family transcriptional regulator, redox-sensing transcriptional regulator	1	1	1	1	1	1	1
K18979	queG; epoxyqueuosine reductase [EC:1.17.99.6]	1	1	2	1	1	2	1
K19062	arr; rifampin ADP-ribosylating transferase	1	1	0	0	0	0	1
K19092	parE1_3_4; toxin ParE1/3/4	2	0	0	0	0	0	1
K19131	csb1; CRISPR-associated protein Csb1	0	0	0	1	0	0	0
K19134	csx10; CRISPR-associated protein Csx10	0	0	0	1	0	0	0
K19147	mcrC; 5-methylcytosine-specific restriction enzyme subunit McrC	0	1	0	0	0	0	0
K19169	dndB; DNA sulfur modification protein DndB	0	1	0	0	0	0	0
K19221	cobA, btuR; cob(I)alamin adenosyltransferase [EC:2.5.1.17]	1	0	1	1	1	0	0
K19225	gluP; rhomboid protease GluP [EC:3.4.21.105]	1	1	1	1	1	0	1
K19265	gpr; L-glyceraldehyde 3-phosphate reductase [EC:1.1.1.-]	0	1	0	0	0	0	1
K19294	algI; alginate O-acetyltransferase complex protein AlgI	0	1	0	0	0	0	0
K19300	aph3-II; aminoglycoside 3'-phosphotransferase II [EC:2.7.1.95]	0	0	0	0	1	0	0
K19302	bcrC; undecaprenyl-diphosphatase [EC:3.6.1.27]	3	2	3	1	2	2	2
K19304	mepM; murein DD-endopeptidase [EC:3.4.24.-]	1	0	0	0	0	0	0
K19311	lipV; lipase [EC:3.1.1.-]	0	0	0	0	1	0	0
K19360	NPHP3; nephrocystin-3	0	0	1	0	0	0	0
K19424	epsF; glycosyltransferase EpsF [EC:2.4.-.-]	1	1	0	2	0	1	0
K19428	epsL; sugar transferase EpsL [EC:2.-.-.-]	0	0	0	0	0	0	1
K19545	lnuA_C_D_E, lin; lincosamide nucleotidyltransferase A/C/D/E	0	0	1	0	0	0	0
K19591	cueR; MerR family transcriptional regulator, copper efflux regulator	0	1	0	0	0	0	0
K19707	rsbQ; sigma-B regulation protein RsbQ	1	0	1	0	0	0	0
K19710	E2.7.7.53; ATP adenylyltransferase [EC:2.7.7.53]	1	1	1	1	1	1	1
K19745	acuI; acrylyl-CoA reductase (NADPH) [EC:1.3.1.-]	0	0	0	0	1	1	0
K19784	chrR, NQR; chromate reductase, NAD(P)H dehydrogenase (quinone)	0	0	0	0	0	1	0
K19811	hsdA; 3alpha-hydroxysteroid 3-dehydrogenase [EC:1.1.1.357]	0	0	0	1	0	0	0
K20035	dmdC; 3-(methylthio)propanoyl-CoA dehydrogenase [EC:1.3.8.-]	0	1	1	1	1	1	1
K20074	prpC, phpP; PPM family protein phosphatase [EC:3.1.3.16]	1	1	0	1	0	0	0
K20265	gadC; glutamate:GABA antiporter	0	1	0	0	0	0	0
K20276	bapA; large repetitive protein	1	1	2	0	1	1	0
K20421	ncsB1; 2,7-dihydroxy-5-methyl-1-naphthoate 7-O-methyltransferase [EC:2.1.1.303]	0	0	0	0	0	1	0
K20444	rfbC; O-antigen biosynthesis protein [EC:2.4.1.-]	0	0	0	1	0	1	0
K20454	dml; 2,3-dimethylmalate lyase [EC:4.1.3.32]	1	0	0	0	0	0	0
K20469	K20469; putative heme transporter	0	0	0	0	1	0	0
K20497	CYP124; methyl-branched lipid omega-hydroxylase [EC:1.14.15.14]	2	1	2	1	1	3	1
K20534	gtrB, csbB; polyisoprenyl-phosphate glycosyltransferase [EC:2.4.-.-]	0	1	1	0	0	0	0
K20628	exlX; expansin	0	0	0	0	0	1	0
K20742	ykfC; gamma-D-glutamyl-L-lysine dipeptidyl-peptidase [EC:3.4.14.13]	0	2	0	0	1	2	0
K20757	dthadh; threo-3-hydroxy-D-aspartate ammonia-lyase [EC:4.3.1.27]	0	0	0	1	0	0	0
K20814	dop; Pup amidohydrolase [EC:3.5.1.119]	1	1	1	1	1	1	1
K20866	yihX; glucose-1-phosphatase [EC:3.1.3.10]	0	1	0	0	0	0	0
K21001	pslH; polysaccharide biosynthesis protein PslH	0	0	0	0	1	0	0
K21014	stf0; trehalose 2-sulfotransferase [EC:2.8.2.37]	0	0	0	0	0	1	0
K21019	sadC; diguanylate cyclase [EC:2.7.7.65]	1	0	0	0	0	1	0
K21021	tpbB; diguanylate cyclase [EC:2.7.7.65]	0	1	0	1	0	0	0
K21023	mucR; diguanylate cyclase [EC:2.7.7.65]	1	0	1	0	0	0	0
K21024	bifA; c-di-GMP phosphodiesterase [EC:3.1.4.52]	0	0	0	0	0	0	1
K21036	vldW; validamycin A dioxygenase [EC:1.14.11.52]	0	0	0	0	0	1	0
K21064	ycsE, yitU, ywtE; 5-amino-6-(5-phospho-D-ribitylamino)uracil phosphatase [EC:3.1.3.104]	0	0	0	0	0	1	0
K21071	pfk, pfp; ATP-dependent phosphofructokinase / diphosphate-dependent phosphofructokinase [EC:2.7.1.11 2.7.1.90]	1	1	1	0	1	1	1
K21084	yegE; diguanylate cyclase [EC:2.7.7.65]	0	0	0	1	0	0	0
K21104	E3.1.1.101; poly(ethylene terephthalate) hydrolase [EC:3.1.1.101]	0	0	0	0	1	0	0
K21119	CYP130; cytochrome P450 family 130	0	0	0	1	0	1	0
K21140	mec; [CysO sulfur-carrier protein]-S-L-cysteine hydrolase [EC:3.13.1.6]	1	1	1	1	1	1	1
K21147	moeZR, moeBR; sulfur-carrier protein adenylyltransferase/sulfurtransferase [EC:2.7.7.80 2.7.7.- 2.8.1.11 2.8.1.-]	1	1	0	0	0	1	0
K21148	cysM; [CysO sulfur-carrier protein]-thiocarboxylate-dependent cysteine synthase [EC:2.5.1.113]	1	1	1	1	1	1	1
K21159	sgcF, ncsF2, kedF; epoxide hydrolase	0	0	0	0	1	0	3
K21195	phnY; 2-aminoethylphosphonate dioxygenase [EC:1.14.11.46]	1	1	1	0	0	0	1
K21210	ncsC; NDP-mannose synthase	0	0	0	0	1	0	0
K21328	calS13, atmS13; dTDP-4-amino-4,6-dideoxy-D-glucose/dTDP-4-amino-2,4-dideoxy-beta-L-xylose transaminase [EC:2.6.1.33 2.6.1.-]	0	0	0	0	1	0	0
K21401	menJ; menaquinone-9 beta-reductase [EC:1.3.99.38]	2	1	2	1	2	2	2
K21449	ata, sadA, emaA; trimeric autotransporter adhesin	1	0	0	0	2	0	1
K21460	sfmM2; L-tyrosine C(3)-methyltransferase [EC:2.1.1.304]	0	0	1	0	0	0	0
K21471	cwlO; peptidoglycan DL-endopeptidase CwlO [EC:3.4.-.-]	2	2	2	2	2	0	1
K21472	lytH; peptidoglycan LD-endopeptidase LytH [EC:3.4.-.-]	2	0	0	0	0	2	0
K21480	HO, pbsA1, hmuO; heme oxygenase (biliverdin-producing, ferredoxin) [EC:1.14.15.20]	1	1	0	1	0	1	1
K21481	mhuD, hmoB; heme oxygenase (mycobilin-producing) [EC:1.14.99.57]	1	1	1	1	1	0	1
K21515	aviRa; 23S rRNA (guanine2535-N1)-methyltransferase [EC:2.1.1.209]	1	0	0	0	0	0	0
K21600	csoR, ricR; CsoR family transcriptional regulator, copper-sensing transcriptional repressor	1	3	2	1	3	1	1
K21672	ord; 2,4-diaminopentanoate dehydrogenase [EC:1.4.1.12 1.4.1.26]	1	3	2	0	0	3	2
K21686	prpR; XRE family transcriptional regulator, fatty acid utilization regulator	0	1	0	0	0	0	0
K21687	rpfA; resuscitation-promoting factor RpfA	0	1	1	1	0	1	0
K21688	rpfB; resuscitation-promoting factor RpfB	1	0	0	0	1	0	2
K21703	cbbR, cmpR, ndhR; LysR family transcriptional regulator, low CO2-responsive transcriptional regulator	1	0	0	0	1	0	1
K21793	redK; oxidoreductase	1	1	0	0	0	0	0
K21822	E1.13.11.82; 8'-apo-carotenoid 13,14-cleaving dioxygenase [EC:1.13.11.82]	0	0	0	0	0	1	0
K21885	cmtR; ArsR family transcriptional regulator, cadmium/lead-responsive transcriptional repressor	1	1	0	0	0	0	0
K21903	cadC, smtB; ArsR family transcriptional regulator, lead/cadmium/zinc/bismuth-responsive transcriptional repressor	1	1	0	0	1	0	0
K21929	udg; uracil-DNA glycosylase [EC:3.2.2.27]	1	1	1	2	1	2	2
K21947	ttuA; tRNA-5-methyluridine54 2-sulfurtransferase [EC:2.8.1.15]	1	1	1	1	1	1	1
K21990	yfdC; formate-nitrite transporter family protein	0	1	0	0	0	0	0
K22010	pdtaR; two-component system, response regulator PdtaR	1	1	1	1	1	1	1
K22027	iacA; indole-3-acetate monooxygenase [EC:1.14.13.235]	1	0	0	0	0	1	0
K22044	ybiO; moderate conductance mechanosensitive channel	1	1	1	1	1	1	1
K22105	fabR; TetR/AcrR family transcriptional regulator, fatty acid biosynthesis regulator	0	0	0	0	0	1	0
K22107	kstR; TetR/AcrR family transcriptional regulator, cholesterol catabolism regulator	2	2	1	1	0	3	2
K22108	kstR2; TetR/AcrR family transcriptional regulator, cholesterol catabolism regulator	0	1	0	0	0	1	1
K22135	bshB2; N-acetylglucosamine malate deacetylase 2 [EC:3.5.1.-]	0	0	0	0	1	0	1
K22187	xylA; alpha-ketoglutaric semialdehyde dehydrogenase [EC:1.2.1.-]	1	0	0	0	0	0	0
K22205	K22205; S-adenosyl-L-methionine hydrolase (adenosine-forming) [EC:3.13.1.8]	1	1	1	1	1	1	1
K22278	pgdA; peptidoglycan-N-acetylglucosamine deacetylase [EC:3.5.1.104]	0	0	0	0	0	2	0
K22295	K22295; TetR/AcrR family transcriptional regulator, repressor for neighboring sulfatase	0	0	0	0	1	0	0
K22297	furA; Fur family transcriptional regulator, stress-responsive regulator	2	2	1	2	0	0	2
K22303	atsK; alpha-ketoglutarate-dependent sulfate ester dioxygenase [EC:1.14.11.-]	0	0	0	0	0	2	0
K22311	ptfP1; phosphatidylinositol dimannoside acyltransferase [EC:2.3.1.265]	1	1	1	1	1	1	1
K22319	oleC; olefin beta-lactone synthetase [EC:6.1.3.1]	0	0	0	0	0	0	1
K22342	dmmA; dimethylamine monooxygenase subunit A [EC:1.14.13.238]	1	0	0	0	0	1	0
K22347	nox; 4,4'-dithiodibutanoate disulfide reductase [EC:1.8.1.20]	1	1	3	1	0	1	1
K22445	ald; 4,4'-diapolycopenoate synthase [EC:1.2.99.10]	0	1	0	0	0	1	0
[truncated: 1 more rows]
