# Supplementary material for: Actinospongicola halichondriae gen. nov. sp. nov., the first sponge-derived cultivated representative of a new genus within the class Acidimicrobiia
Source: Research Square preprint supplement (doi:10.21203/rs.3.rs-5934688/v1), 2025-03-12
Supplement: Supplementary file 5 [file ea11c08683bdb5ab3fe362a5.docx]

| Characteristic | 1 | 2 | 3 | 4 | 5 | 6 | 7 |
| --- | --- | --- | --- | --- | --- | --- | --- |
| Origin | Sponge | Human skin (keratinocytes) | Daechung Reservoir water sample | South China Sea sediment | Saline lake sediment | Hot spring sediment | The abdominal epidermis of a sea cucumber, *Holothuria edulis* |
| Cell morphology | Rod | Rod | Short rod | Short rod | Short rod | Short rod | Rod |
| Cell length (μm) | 1.5 - 2 | 0.8-1.4 | 0.7-1.0 | 1.0-2.0 | 1.1 | 0.8-1.0 | 1.2-1.7 |
| Cell width (μm) | 0.5 | 0.4-0.7 | 0.3-0.5 | 0.3-0.6 | 0.5 | 0.5-0.6 | 0.3-0.5 |
| Temperature (℃) range (optimum) | 5-35 (30-35) | 18-37 (25) | 15-37 (30) | 10-45 (35-37) | 28-37 (37) | 37-55 (45) | 15-40 (28-30) |
| Salt tolerance  (% w/v) range | 1-2 (tropic marine salt) | 0-1.0 (NaCl) | 0-0.5 (NaCl) | 0-5.0 (NaCl) | 0-6.0 (NaCl) | 0-3.0 (NaCl) | 0-12.0 (NaCl) |
| Ph range (optimum) | 6.0-8.5 (6.0-7.0) | 6.0-8.0 (7.0) | 7.0 (7.0) | 6.0-9.0 (7.0) | 6.0–10.0 (8.0) | 7.0-8.0 (7.0) | 6.0-9.0 (7.0) |
| Major menaquinones | MK-9(H8) | MK-9(H8) | MK-9(H6) | MK-9(H8) | MK-9(H8) | MK-9(H8) | MK-9(H6) |
| Diaminopimelic acid | meso-DAP | meso-DAP | NA | dd-DAP | meso-DAP | meso-DAP | meso-DAP |
| Polar lipids | DPG, GPL, GL, PL | DPG, APL  APGL, PGL,  L1, L2 | DPG, PI, PIM | DPG, PI, PC, PIM | DPG, PI, PIM | DPG, PI, PIM | NA |
| Major fatty acids | C18:1 ω7c, C16:1 ω7c, C17:1 ω8c | C16:0,  C18:1 ω9c | C16:1 ω5c, C16:0, C17:1 ω8c,  C18:1 ω9c | C17:1 ω8c, C17:0 | iso-C16:0, C17:0, C16:0 | C16:0, C17:0, C18:0, iso-C16:0 | C17:0,  C17:1 ω8c, C15:0, C16:0 |
|  |  |  |  |  |  |  |  |

**Table 3** Phenotypic characteristics of strain Hal317T and phylogenetically related type strains in the family *Iamiaceae*

Strains: 1, Hal317T (CP107030, this study); 2, *Actinomarinicola tropica* SCSIO 58843T (GCA_009650215.1); 3, *Aquihabitans daechungensis* CH22-21T (CP172265, this study); 4, *Dermatobacter hominis* Kera-3T (GCA_020715685.1); 5, *Iamia majanohamensis* F12T (GCA_028532485.1); 6, *Rhabdothermincola salaria* EGI L10124T (GCA_021246445.1); 7, *Rhabdothermincola sediminis* SYSU G02662T (GCA_014805525.1); APGL, aminophosphoglycolipids; APL, aminophospholipids; DPG, diphosphatidylglycerol; GL, glycolipid; GPL, glycophosholipid; L, lipid; PC, phospatidylcholine; PGL, phosphoglycolipids; PI, phosphatidylinositol; PIM, phosphatidylinositol mannoside; PL, phospholipid; NA, not specified
